# Supplementary material for: Breakdown of local information processing may underlie isoflurane anesthesia effects
Source: PubMed Central journal article supplement (PMC5453425; doi:10.1371/journal.pcbi.1005511), 2017-06-01
Supplement: pcbi.1005511.s002.pdf [file pcbi.1005511.s002.pdf]

| <b>animal</b> | <b>isoflurane level</b> | <b>recording site</b> | $p$       | $\tilde{R}^2$ ( $max(R^2)$ ) |
|---------------|-------------------------|-----------------------|-----------|------------------------------|
| 1             | iso 0.0 %               | PFC                   | 1.0000    | 0.024 (0.289)                |
|               |                         | V1                    | 0.1028    | 0.003 (0.153)                |
|               | iso 0.5 %               | PFC                   | 0.0013**  | 0.001 (0.122)                |
|               |                         | V1                    | 0.0000*** | 0.014 (0.114)                |
|               | iso 1.0 %               | PFC                   | 0.0000*** | 0.005 (0.271)                |
|               |                         | V1                    | 0.9998    | 0.004 (0.051)                |
| 2             | iso 0.0 %               | PFC                   | 0.0000*** | 0.022 (0.116)                |
|               |                         | V1                    | 0.0000*** | 0.029 (0.175)                |
|               | iso 0.5 %               | PFC                   | 0.7672    | 0.007 (0.018)                |
|               |                         | V1                    | 0.0000*** | 0.017 (0.076)                |
|               | iso 1.0 %               | PFC                   | 0.0000*** | 0.008 (0.121)                |
|               |                         | V1                    | 0.8247    | 0.009 (0.214)                |

\* $p < 0.05$ ; \*\* $p < 0.01$ ; \*\*\* $p < 0.001$
