# Supplementary material for: Breakdown of local information processing may underlie isoflurane anesthesia effects
Source: PubMed Central journal article supplement (PMC5453425; doi:10.1371/journal.pcbi.1005511), 2017-06-01
Supplement: pcbi.1005511.s004.pdf [file pcbi.1005511.s004.pdf]

| animal | isoflurane level | direction | ACT      |                          | signal variance |                          |
|--------|------------------|-----------|----------|--------------------------|-----------------|--------------------------|
|        |                  |           | $p$      | $\tilde{R}^2 (max(R^2))$ | $p$             | $\tilde{R}^2 (max(R^2))$ |
| 1      | iso 0.0 %        | PFC → V1  | 1.0000   | 0.035 (0.110)            | 0.9861          | 0.009 (0.060)            |
|        |                  | V1 → PFC  | 0.9996   | 0.029 (0.215)            | 0.6644          | 0.024 (0.089)            |
|        | iso 0.5 %        | PFC → V1  | 1.0000   | 0.016 (0.110)            | 1.0000          | 0.024 (0.033)            |
|        |                  | V1 → PFC  | 0.7310   | 0.003 (0.014)            | 0.0063*         | 0.005 (0.011)            |
|        | iso 1.0 %        | PFC → V1  | 1.0000   | 0.006 (0.047)            | 0.5836          | 0.002 (0.037)            |
|        |                  | V1 → PFC  | 0.0069*  | 0.001 (0.032)            | 0.0000***       | 0.005 (0.092)            |
| 2      | iso 0.0 %        | PFC → V1  | 1.0000   | 0.063 (0.105)            | 0.8315          | 0.008 (0.025)            |
|        |                  | V1 → PFC  | 0.9996   | 0.006 (0.041)            | 0.0434          | 0.005 (0.031)            |
|        | iso 0.5 %        | PFC → V1  | 1.0000   | 0.115 (0.155)            | 0.0440          | 0.017 (0.103)            |
|        |                  | V1 → PFC  | 1.0000   | 0.022 (0.125)            | 0.9985          | 0.005 (0.086)            |
|        | iso 1.0 %        | PFC → V1  | 0.0000** | 0.011 (0.111)            | 0.0000***       | 0.012 (0.058)            |
|        |                  | V1 → PFC  | 0.0076*  | 0.009 (0.031)            | 0.0000***       | 0.015 (0.032)            |

\* $p < 0.05$ ; \*\* $p < 0.01$ ; \*\*\* $p < 0.001$
