# Supplementary material for: Breakdown of local information processing may underlie isoflurane anesthesia effects
Source: PubMed Central journal article supplement (PMC5453425; doi:10.1371/journal.pcbi.1005511), 2017-06-01
Supplement: pcbi.1005511.s006.pdf [file pcbi.1005511.s006.pdf]

| animal | level     | site | $\delta$ |                          | $\theta$  |                          | $\alpha$  |                          |
|--------|-----------|------|----------|--------------------------|-----------|--------------------------|-----------|--------------------------|
|        |           |      | $p$      | $\tilde{R}^2 (max(R^2))$ | $p$       | $\tilde{R}^2 (max(R^2))$ | $p$       | $\tilde{R}^2 (max(R^2))$ |
| 1      | iso 0.0 % | PFC  | 1.0000   | 0.095 (0.458)            | 1.0000    | 0.015 (0.201)            | 1.0000    | 0.020 (0.271)            |
|        |           | V1   | 1.0000   | 0.091 (0.706)            | 0.9998    | 0.037 (0.109)            | 1.0000    | 0.041 (0.097)            |
|        | iso 0.5 % | PFC  | 1.0000   | 0.046 (0.202)            | 1.0000    | 0.004 (0.036)            | 1.0000    | 0.003 (0.059)            |
|        |           | V1   | 1.0000   | 0.035 (0.133)            | 0.9100    | 0.040 (0.051)            | 0.8029    | 0.002 (0.086)            |
|        | iso 1.0 % | PFC  | 1.0000   | 0.020 (0.079)            | 0.0359    | 0.005 (0.082)            | 0.9198    | 0.004 (0.023)            |
|        |           | V1   | 1.0000   | 0.010 (0.461)            | 0.9941    | 0.003 (0.061)            | 0.9991    | 0.004 (0.032)            |
| 2      | iso 0.0 % | PFC  | 1.0000   | 0.171 (0.395)            | 1.0000    | 0.058 (0.110)            | 1.0000    | 0.024 (0.060)            |
|        |           | V1   | 1.0000   | 0.031 (0.723)            | 1.0000    | 0.036 (0.135)            | 1.0000    | 0.048 (0.170)            |
|        | iso 0.5 % | PFC  | 1.0000   | 0.035 (0.298)            | 1.0000    | 0.011 (0.016)            | 1.0000    | 0.015 (0.088)            |
|        |           | V1   | 1.0000   | 0.038 (0.135)            | 0.0428    | 0.021 (0.073)            | 0.0000*** | 0.016 (0.045)            |
|        | iso 1.0 % | PFC  | 1.0000   | 0.015 (0.580)            | 0.0000*** | 0.006 (0.076)            | 0.0000*** | 0.008 (0.219)            |
|        |           | V1   | 1.0000   | 0.112 (0.601)            | 0.1329    | 0.003 (0.062)            | 0.0000*** | 0.009 (0.094)            |

| animal | level     | site | $\beta$   |                          | $\gamma$  |                          |
|--------|-----------|------|-----------|--------------------------|-----------|--------------------------|
|        |           |      | $p$       | $\tilde{R}^2 (max(R^2))$ | $p$       | $\tilde{R}^2 (max(R^2))$ |
| 1      | iso 0.0 % | PFC  | 0.9665    | 0.018 (0.165)            | 0.0000*** | 0.052 (0.097)            |
|        |           | V1   | 0.9999    | 0.046 (0.121)            | 0.0000*** | 0.014 (0.358)            |
|        | iso 0.5 % | PFC  | 1.0000    | 0.007 (0.020)            | 0.5510    | 0.013 (0.064)            |
|        |           | V1   | 0.0000*** | 0.028 (0.089)            | 0.0000*** | 0.006 (0.011)            |
|        | iso 1.0 % | PFC  | 0.2144    | 0.005 (0.056)            | 0.0269    | 0.006 (0.082)            |
|        |           | V1   | 0.4394    | 0.002 (0.040)            | 0.2250    | 0.003 (0.053)            |
| 2      | iso 0.0 % | PFC  | 1.0000    | 0.011 (0.043)            | 0.0000*** | 0.001 (0.068)            |
|        |           | V1   | 0.5631    | 0.022 (0.094)            | 0.0000*** | 0.037 (0.061)            |
|        | iso 0.5 % | PFC  | 1.0000    | 0.013 (0.107)            | 1.0000    | 0.012 (0.095)            |
|        |           | V1   | 0.0000*** | 0.034 (0.096)            | 0.0000*** | 0.010 (0.102)            |
|        | iso 1.0 % | PFC  | 0.0000*** | 0.007 (0.051)            | 0.0000*** | 0.012 (0.290)            |
|        |           | V1   | 0.0017*   | 0.011 (0.072)            | 0.0000*** | 0.013 (0.103)            |

\* $p < 0.05$ ; \*\* $p < 0.01$ ; \*\*\* $p < 0.001$
