# Supplementary material for: Breakdown of local information processing may underlie isoflurane anesthesia effects
Source: PubMed Central journal article supplement (PMC5453425; doi:10.1371/journal.pcbi.1005511), 2017-06-01
Supplement: pcbi.1005511.s008.pdf [file pcbi.1005511.s008.pdf]

| <b>measure</b>          | <b>toolbox/implementation</b> | <b>mean running time [min]</b> |
|-------------------------|-------------------------------|--------------------------------|
| <i>TE<sub>SPO</sub></i> | TRENTOOL/GPU-implementation   | 2235.93 (314.27 SD)            |
| <i>TE<sub>SPO</sub></i> | TRENTOOL/CPU-implementation   | 1871.51 (926.56 SD)            |
| <i>AIS</i>              | TRENTOOL/CPU-implementation   | 2.83 (1.51 SD)                 |
| <i>H</i>                | JIDT/CPU-implementation       | 1.55 (0.56 SD)                 |

SD = standard deviation
