# Supplementary material for: Breakdown of local information processing may underlie isoflurane anesthesia effects
Source: PLoS Comput Biol. 2017 Jun 1;13(6):e1005511. doi: 10.1371/journal.pcbi.1005511 (PMC5453425; doi:10.1371/journal.pcbi.1005511)
Supplement: S1 Dataset — (ZIP) [file pcbi.1005511.s001.zip]

Archive with 45 entries (45 files):
- ferret_1_ais_ksg_median_param_interaction.csv
- ferret_1_ais_ksg_median_param_main_effect.csv
- ferret_1_ais_ksg_raw_lmm.csv
- ferret_1_ais_ksg_raw_median.csv
- ferret_1_ais_nsb_mean_param_interaction.csv
- ferret_1_ais_nsb_mean_param_main_effect.csv
- ferret_1_ais_nsb_raw_mean.csv
- ferret_1_h_ksg_median_param_interaction.csv
- ferret_1_h_ksg_median_param_main_effect.csv
- ferret_1_h_ksg_raw_lmm.csv
- ferret_1_h_ksg_raw_median.csv
- ferret_1_h_nsb_mean_param_interaction.csv
- ferret_1_h_nsb_mean_param_main_effect.csv
- ferret_1_h_nsb_raw_mean.csv
- ferret_1_te_ksg_median_param_interaction.csv
- ferret_1_te_ksg_median_param_main_effect.csv
- ferret_1_te_ksg_raw_lmm.csv
- ferret_1_te_ksg_raw_median.csv
- ferret_1_te_nsb_mean_param_interaction.csv
- ferret_1_te_nsb_mean_param_main_effect.csv
- ferret_1_te_nsb_raw_mean.csv
- ferret_1_te_opt_u.csv
- ferret_2_ais_ksg_median_param_interaction.csv
- ferret_2_ais_ksg_median_param_main_effect.csv
- ferret_2_ais_ksg_raw_lmm.csv
- ferret_2_ais_ksg_raw_median.csv
- ferret_2_ais_nsb_mean_param_interaction.csv
- ferret_2_ais_nsb_mean_param_main_effect.csv
- ferret_2_ais_nsb_raw_mean.csv
- ferret_2_h_ksg_median_param_interaction.csv
- ferret_2_h_ksg_median_param_main_effect.csv
- ferret_2_h_ksg_raw_lmm.csv
- ferret_2_h_ksg_raw_median.csv
- ferret_2_h_nsb_mean_param_interaction.csv
- ferret_2_h_nsb_mean_param_main_effect.csv
- ferret_2_h_nsb_raw_mean.csv
- ferret_2_te_ksg_median_param_interaction.csv
- ferret_2_te_ksg_median_param_main_effect.csv
- ferret_2_te_ksg_raw_lmm.csv
- ferret_2_te_ksg_raw_median.csv
- ferret_2_te_nsb_mean_param_interaction.csv
- ferret_2_te_nsb_mean_param_main_effect.csv
- ferret_2_te_nsb_raw_mean.csv
- ferret_2_te_opt_u.csv
- readme.txt
