# Supplementary material for: Breakdown of local information processing may underlie isoflurane anesthesia effects
Source: PLoS Comput Biol. 2017 Jun 1;13(6):e1005511. doi: 10.1371/journal.pcbi.1005511 (PMC5453425; doi:10.1371/journal.pcbi.1005511)
Supplement: S1 Dataset — (ZIP) [file pcbi.1005511.s001.zip › ferret_1_ais_ksg_median_param_interaction.csv]

mean PFC	sem PFC	mean V1	sem V1
-1.1268	0.14888	0.50452	0.23903
-0.11905	0.48252	-0.77087	0.2427
1.0901	0.18566	-0.14733	0.21824
