# Supplementary material for: Breakdown of local information processing may underlie isoflurane anesthesia effects
Source: PLoS Comput Biol. 2017 Jun 1;13(6):e1005511. doi: 10.1371/journal.pcbi.1005511 (PMC5453425; doi:10.1371/journal.pcbi.1005511)
Supplement: S1 Dataset — (ZIP) [file pcbi.1005511.s001.zip › ferret_1_ais_ksg_median_param_main_effect.csv]

mean	sem
-0.31113	0.25071
-0.44496	0.27682
0.47138	0.19898
