# Supplementary material for: Breakdown of local information processing may underlie isoflurane anesthesia effects
Source: PLoS Comput Biol. 2017 Jun 1;13(6):e1005511. doi: 10.1371/journal.pcbi.1005511 (PMC5453425; doi:10.1371/journal.pcbi.1005511)
Supplement: S1 Dataset — (ZIP) [file pcbi.1005511.s001.zip › ferret_1_ais_ksg_raw_lmm.csv]

raw data	factor anesthesia	factor direction	factor recording
1.4478	1	0	1
1.5891	1	0	1
1.5042	1	0	1
1.2742	1	0	1
1.2153	1	0	1
1.2432	1	0	1
1.3133	1	0	1
1.2899	1	0	1
1.414	1	0	1
1.3389	1	0	1
1.294	1	0	1
1.2171	1	0	1
1.3315	1	0	1
0.93891	1	0	1
1.6048	1	0	1
1.2884	1	0	1
1.2479	1	0	1
1.26	1	0	1
1.2287	1	0	1
1.2741	1	0	1
1.6308	1	0	1
1.286	1	0	1
1.2902	1	0	1
1.2658	1	0	1
1.3692	1	0	1
1.445	1	0	1
1.5016	1	0	1
1.4719	1	0	1
1.4542	1	0	1
1.4933	1	0	1
1.4477	1	0	1
1.4442	1	0	1
1.4753	1	0	1
1.5046	1	0	1
1.5084	1	0	1
1.6334	1	0	1
1.6598	1	0	1
1.5124	1	0	1
1.5671	1	0	1
1.5238	1	0	1
1.5085	1	0	1
1.5452	1	0	1
1.5288	1	0	1
1.5447	1	0	1
1.5357	1	0	1
1.5467	1	0	1
1.5664	1	0	1
1.6368	1	0	1
1.6088	1	0	1
1.5628	1	0	1
1.5706	1	0	1
1.5512	1	0	1
1.5984	1	0	1
1.5681	1	0	1
1.6018	1	0	1
1.5335	1	0	1
1.5747	1	0	1
1.567	1	0	1
1.5163	1	0	1
1.6325	1	0	1
1.6059	1	0	1
1.5674	1	0	1
1.5331	1	0	1
1.5016	1	0	1
1.496	1	0	1
1.5312	1	0	1
1.5219	1	0	1
1.5149	1	0	1
1.4757	1	0	1
1.4893	1	0	1
1.4849	1	0	1
1.4723	1	0	1
1.5077	1	0	1
1.5036	1	0	1
1.4617	1	0	1
1.4849	1	0	1
1.4709	1	0	1
1.5223	1	0	1
1.5502	1	0	1
1.5349	1	0	1
1.5274	1	0	1
1.5303	1	0	1
1.4813	1	0	1
1.4219	1	0	1
1.4455	1	0	1
1.4862	1	0	1
1.5378	1	0	1
1.536	1	0	1
1.5393	1	0	1
1.4635	1	0	1
1.4563	1	0	1
1.4183	1	0	1
1.415	1	0	1
1.4145	1	0	1
1.4405	1	0	1
1.4034	1	0	1
1.3848	1	0	1
1.4509	1	0	1
1.3761	1	0	1
1.4966	1	0	1
1.4084	1	0	1
1.4075	1	0	1
1.4182	1	0	1
1.3652	1	0	1
1.4151	1	0	1
1.4903	1	0	1
1.494	1	0	1
1.4628	1	0	1
1.4115	1	0	1
1.4141	1	0	1
1.4496	1	0	1
1.428	1	0	1
1.4145	1	0	1
1.525	1	0	1
1.4228	1	0	1
1.388	1	0	1
1.4529	1	0	1
1.4544	1	0	1
1.3739	1	0	1
1.4566	1	0	1
1.476	1	0	1
1.5662	1	0	1
1.4105	1	0	1
1.4906	1	0	1
1.6573	1	0	1
1.4922	1	0	1
1.6061	1	0	1
1.4407	1	0	1
1.4073	1	0	1
1.3825	1	0	1
1.3494	1	0	1
1.3436	1	0	1
1.3771	1	0	1
1.3429	1	0	1
1.354	1	0	1
1.4044	1	0	1
1.4232	1	0	1
1.3604	1	0	1
1.4383	1	0	1
1.3322	1	0	1
1.3235	1	0	1
1.2886	1	0	1
1.3291	1	0	1
1.2902	1	0	1
1.3213	1	0	1
1.3282	1	0	1
1.3509	1	0	1
1.3406	1	0	1
1.3646	1	0	1
1.3444	1	0	1
1.3868	1	0	1
1.3169	1	0	1
1.2869	1	0	1
1.2711	1	0	1
1.2999	1	0	1
1.4286	1	0	1
1.3214	1	0	1
1.2724	1	0	1
1.2761	1	0	1
1.382	1	0	1
1.3464	1	0	1
1.7746	1	0	1
1.6216	1	0	1
1.443	1	0	1
1.4246	1	0	1
1.5295	1	0	1
1.8043	1	0	1
1.5764	1	0	1
1.4738	1	0	1
1.7443	1	0	1
2.0565	1	0	1
1.454	1	0	1
1.438	1	0	1
1.3435	1	0	1
1.3828	1	0	1
1.2644	1	0	1
1.3639	1	0	1
1.2429	1	0	1
1.3981	1	0	1
1.3109	1	0	1
1.3111	1	0	1
1.2684	1	0	1
1.2672	1	0	1
1.3721	1	0	1
1.3353	1	0	1
1.2737	1	0	1
1.2931	1	0	1
1.3128	1	0	1
1.3008	1	0	1
1.3093	1	0	1
1.267	1	0	1
1.288	1	0	1
1.3357	1	0	1
1.4019	1	0	1
1.2909	1	0	1
1.2618	1	0	1
1.3279	1	0	1
1.2821	1	0	1
1.3031	1	0	1
1.3235	1	0	1
1.2452	1	0	1
1.3016	1	0	1
1.3016	1	0	1
1.2575	1	0	1
1.3083	1	0	1
1.3553	1	0	1
1.3301	1	0	1
1.2991	1	0	1
1.2575	1	0	1
1.3033	1	0	1
1.3192	1	0	1
1.3245	1	0	1
1.284	1	0	1
1.3048	1	0	1
1.3272	1	0	1
1.2411	1	0	1
1.3395	1	0	1
1.2699	1	0	1
1.2367	1	0	1
1.3016	1	0	1
1.3159	1	0	1
1.287	1	0	1
1.3131	1	0	1
1.2636	1	0	1
1.2316	1	0	1
1.3763	1	0	1
1.2825	1	0	1
1.282	1	0	1
1.3484	1	0	1
1.3022	1	0	1
1.2964	1	0	1
1.3216	1	0	1
1.2359	1	0	1
1.3471	1	0	1
1.2433	1	0	1
1.2656	1	0	1
1.2641	1	0	1
1.2813	1	0	1
1.2742	1	0	1
1.2969	1	0	1
1.3294	1	0	1
1.2836	1	0	1
1.3139	1	0	1
1.3231	1	0	1
1.1398	1	0	2
1.0094	1	0	2
1.1431	1	0	2
1.481	1	0	2
1.0742	1	0	2
1.0532	1	0	2
0.82774	1	0	2
0.88931	1	0	2
1.248	1	0	2
1.3248	1	0	2
0.92545	1	0	2
1.2441	1	0	2
1.1376	1	0	2
0.86238	1	0	2
1.3997	1	0	2
0.99057	1	0	2
1.2575	1	0	2
0.86215	1	0	2
0.95794	1	0	2
1.514	1	0	2
1.2257	1	0	2
0.85304	1	0	2
0.99149	1	0	2
1.271	1	0	2
0.81991	1	0	2
1.0868	1	0	2
1.9171	1	0	2
0.77578	1	0	2
2.1731	1	0	2
0.94736	1	0	2
0.6973	1	0	2
1.0173	1	0	2
1.4897	1	0	2
1.2943	1	0	2
0.6672	1	0	2
0.64827	1	0	2
0.95619	1	0	2
0.73453	1	0	2
1.4466	1	0	2
1.3335	1	0	2
1.4234	1	0	2
1.2119	1	0	2
0.88102	1	0	2
0.94177	1	0	2
0.97346	1	0	2
1.6322	1	0	2
1.5113	1	0	2
0.80784	1	0	2
0.68394	1	0	2
1.4208	1	0	2
0.9012	1	0	2
1.455	1	0	2
1.8813	1	0	2
0.92626	1	0	2
0.68249	1	0	2
1.3746	1	0	2
1.2311	1	0	2
1.5727	1	0	2
0.99915	1	0	2
1.365	1	0	2
1.0699	1	0	2
0.90985	1	0	2
0.9185	1	0	2
1.4585	1	0	2
1.2348	1	0	2
1.6798	1	0	2
1.2691	1	0	2
1.2899	1	0	2
0.85749	1	0	2
0.88528	1	0	2
0.76492	1	0	2
1.2857	1	0	2
1.6801	1	0	2
1.662	1	0	2
1.1713	1	0	2
1.1371	1	0	2
1.218	1	0	2
1.0881	1	0	2
0.68269	1	0	2
0.84958	1	0	2
2.013	1	0	2
1.9067	1	0	2
2.0085	1	0	2
1.0173	1	0	2
0.59233	1	0	2
0.93399	1	0	2
1.2403	1	0	2
0.76681	1	0	2
0.94248	1	0	2
1.6138	1	0	2
1.6704	1	0	2
1.7862	1	0	2
1.8658	1	0	2
0.8566	1	0	2
0.69676	1	0	2
0.63197	1	0	2
0.83264	1	0	2
1.6855	1	0	2
1.2258	1	0	2
0.83663	1	0	2
1.2384	1	0	2
1.2386	1	0	2
1.104	1	0	2
1.5011	1	0	2
1.592	1	0	2
1.3936	1	0	2
1.3306	1	0	2
1.0194	1	0	2
1.172	1	0	2
0.75558	1	0	2
0.7926	1	0	2
0.67801	1	0	2
0.84713	1	0	2
1.2024	1	0	2
1.3454	1	0	2
1.1902	1	0	2
1.5556	1	0	2
1.3657	1	0	2
1.4901	1	0	2
1.1645	1	0	2
1.3599	1	0	2
1.2383	1	0	3
1.7377	1	0	3
1.3251	1	0	3
0.78409	1	0	3
1.2637	1	0	3
0.9312	1	0	3
1.0769	1	0	3
1.4083	1	0	3
0.79157	1	0	3
1.124	1	0	3
0.79286	1	0	3
1.2389	1	0	3
1.1131	1	0	3
0.95951	1	0	3
1.1578	1	0	3
0.72561	1	0	3
1.1872	1	0	3
1.1965	1	0	3
1.4326	1	0	3
0.93963	1	0	3
0.92662	1	0	3
1.4345	1	0	3
0.61443	1	0	3
1.0406	1	0	3
1.1984	1	0	3
1.3005	1	0	3
1.0284	1	0	3
1.4221	1	0	3
1.0993	1	0	3
1.1122	1	0	3
1.0678	1	0	3
0.96653	1	0	3
1.0627	1	0	3
1.1074	1	0	3
1.3428	1	0	3
1.0146	1	0	3
1.2771	1	0	3
1.0427	1	0	3
1.3709	1	0	3
1.1217	1	0	3
1.5822	1	0	3
1.462	1	0	3
1.6567	1	0	3
0.61378	1	0	3
1.259	1	0	3
1.1716	1	0	3
1.6046	1	0	3
1.0691	1	0	3
0.89761	1	0	3
1.7719	1	0	3
1.2709	1	0	3
1.7101	1	0	3
1.583	1	0	3
1.351	1	0	3
1.3886	1	0	3
0.98731	1	0	3
1.0515	1	0	3
1.4119	1	0	3
0.99588	1	0	3
1.6144	1	0	3
1.2418	1	0	3
1.5487	1	0	3
1.4218	1	0	3
0.94537	1	0	3
1.1021	1	0	3
0.97051	1	0	3
0.79217	1	0	3
0.94417	1	0	3
1.4595	1	0	3
1.6051	1	0	3
1.0256	1	0	3
0.99111	1	0	3
1.2814	1	0	3
0.994	1	0	3
0.72906	1	0	3
0.72065	1	0	3
1.4971	1	0	3
1.6108	1	0	3
0.88894	1	0	3
1.526	1	0	3
0.81894	1	0	3
0.82212	1	0	3
1.2289	1	0	3
0.90707	1	0	3
0.68547	1	0	3
0.78438	1	0	3
0.87765	1	0	3
1.122	1	0	3
1.292	1	0	3
1.0594	1	0	4
0.86834	1	0	4
0.86965	1	0	4
1.6116	1	0	4
0.9191	1	0	4
1.6827	1	0	4
0.96587	1	0	4
0.81009	1	0	4
0.9157	1	0	4
1.2521	1	0	4
0.89339	1	0	4
1.1424	1	0	4
0.88909	1	0	4
1.0733	1	0	4
1.1026	1	0	4
1.1762	1	0	4
1.0407	1	0	4
0.96291	1	0	4
0.94144	1	0	4
1.022	1	0	4
0.86761	1	0	4
0.94523	1	0	4
0.97325	1	0	4
0.75354	1	0	4
1.0183	1	0	4
0.80175	1	0	4
0.75793	1	0	4
0.76144	1	0	4
0.68633	1	0	4
0.83038	1	0	4
1.225	1	0	4
0.84421	1	0	4
1.0219	1	0	4
0.81853	1	0	4
0.83322	1	0	4
0.89606	1	0	4
0.76672	1	0	4
0.79701	1	0	4
1.0059	1	0	4
0.71106	1	0	4
1.0043	1	0	4
0.84168	1	0	4
0.80427	1	0	4
0.77878	1	0	4
0.84235	1	0	4
0.82637	1	0	4
0.69149	1	0	4
0.99202	1	0	4
0.79352	1	0	4
0.70054	1	0	4
0.7606	1	0	4
0.76198	1	0	4
0.97777	1	0	4
0.68398	1	0	4
0.84766	1	0	4
0.81996	1	0	4
0.80765	1	0	4
0.96283	1	0	4
0.81337	1	0	4
1.0249	1	0	4
0.97995	1	0	4
0.6532	1	0	4
1.0015	1	0	4
0.7151	1	0	4
0.82073	1	0	4
1.1147	1	0	4
1.5866	1	0	4
1.0082	1	0	4
0.98418	1	0	4
1.0528	1	0	4
0.74916	1	0	4
0.90351	1	0	4
0.94827	1	0	4
1.3253	1	0	4
0.74425	1	0	4
0.90306	1	0	4
0.8387	1	0	4
1.2829	1	0	4
1.0746	1	0	4
1.1889	1	0	4
1.2293	1	0	4
1.0991	1	0	4
0.81531	1	0	4
1.0186	1	0	4
0.76051	1	0	4
1.7459	1	0	4
1.0117	1	0	4
1.1344	1	0	4
1.2631	1	0	4
1.0124	1	0	4
1.8554	1	0	4
1.4495	1	0	4
1.4202	1	0	4
1.6125	1	0	4
1.4055	1	0	4
1.148	1	0	4
1.0144	1	0	4
0.94091	1	0	4
0.63442	1	0	4
0.76827	1	0	4
1.1371	1	0	4
1.0198	1	0	4
0.87947	1	0	4
1.2941	1	0	4
0.81865	1	0	4
1.0046	1	0	4
0.89167	1	0	4
0.8542	1	0	4
0.73649	1	0	4
1.0061	1	0	4
0.93979	1	0	4
1.3433	1	0	4
1.5817	1	0	4
1.2222	1	0	4
0.78749	1	0	4
0.85773	1	0	4
0.9622	1	0	4
1.2755	1	0	4
0.8004	1	0	4
1.0955	1	0	4
0.76833	1	0	4
0.86616	1	0	4
1.4839	1	0	4
1.7847	1	0	4
1.1115	1	0	4
1.0107	1	0	4
1.1064	1	0	4
0.81121	1	0	4
0.83062	1	0	4
0.87722	1	0	4
0.90181	1	0	4
0.88415	1	0	4
1.25	1	0	4
0.80015	1	0	4
0.65917	1	0	4
1.0527	1	0	4
1.1584	1	0	4
0.67138	1	0	4
0.68808	1	0	4
0.82505	1	0	4
0.9968	1	0	4
0.97958	1	0	4
1.348	1	0	4
1.5553	1	0	4
0.82515	1	0	4
0.86394	1	0	4
1.0181	1	0	4
1.2317	1	0	4
0.74527	1	0	4
1.2505	1	0	4
0.66373	1	0	4
1.1379	1	0	4
1.3933	1	0	4
1.5252	1	0	4
1.2446	1	0	4
0.92712	1	0	4
0.65026	1	0	4
1.0579	1	0	4
0.65629	1	0	4
0.75677	1	0	4
0.92851	1	0	4
0.60297	1	0	4
0.70523	1	0	4
1.1056	1	0	4
1.1902	1	0	4
1.0707	1	0	4
1.0503	1	0	4
1.6632	1	0	4
1.5014	1	0	4
0.77999	1	0	4
1.1775	1	0	4
0.79429	1	0	4
1.2569	1	0	4
2.9966	1	0	4
0.81041	1	0	4
1.4616	1	0	4
1.2394	1	0	4
1.6521	1	0	4
0.88995	1	0	4
0.93541	1	0	5
0.88487	1	0	5
0.83292	1	0	5
0.85693	1	0	5
0.8676	1	0	5
1.0946	1	0	5
1.0156	1	0	5
1.13	1	0	5
0.95252	1	0	5
1.4074	1	0	5
0.99616	1	0	5
1.0001	1	0	5
1.1164	1	0	5
1.1508	1	0	5
1.0794	1	0	5
0.94764	1	0	5
0.95381	1	0	5
0.83292	1	0	5
0.82034	1	0	5
0.75626	1	0	5
0.79556	1	0	5
0.84925	1	0	5
0.64605	1	0	5
0.97999	1	0	5
0.86871	1	0	5
0.87501	1	0	5
0.86642	1	0	5
1.033	1	0	5
1.0046	1	0	5
0.85204	1	0	5
0.85278	1	0	5
0.81876	1	0	5
0.77099	1	0	5
0.89115	1	0	5
0.84505	1	0	5
0.81242	1	0	5
0.79699	1	0	5
0.8713	1	0	5
0.79564	1	0	5
0.79156	1	0	5
0.94604	1	0	5
0.98688	1	0	5
0.88483	1	0	5
0.98219	1	0	5
0.98601	1	0	5
0.87387	1	0	5
0.85433	1	0	5
0.78658	1	0	5
0.92044	1	0	5
0.84741	1	0	5
0.90799	1	0	5
1.3795	1	0	5
0.64859	1	0	5
1.0209	1	0	5
1.0789	1	0	5
0.91436	1	0	5
0.98678	1	0	5
0.80152	1	0	5
0.88826	1	0	5
0.97258	1	0	5
0.66332	1	0	5
0.61598	1	0	5
0.57588	1	0	5
1.2888	1	0	5
1.236	1	0	5
1.2436	1	0	5
0.89741	1	0	5
1.049	1	0	5
0.82492	1	0	5
1.0443	1	0	5
0.90762	1	0	5
1.3358	1	0	5
0.91355	1	0	5
0.66786	1	0	5
0.86377	1	0	5
0.69578	1	0	5
0.85642	1	0	5
1.1102	1	0	5
0.9058	1	0	5
1.0897	1	0	5
0.72228	1	0	5
0.81848	1	0	5
0.92111	1	0	5
0.7254	1	0	5
1.0849	1	0	5
0.67793	1	0	5
0.82324	1	0	5
1.0799	1	0	5
1.5578	1	0	5
1.0148	1	0	5
0.93912	1	0	5
0.67107	1	0	5
0.82264	1	0	5
0.99195	1	0	5
0.71738	1	0	5
1.0463	1	0	5
1.1892	1	0	5
0.99532	1	0	5
0.94343	1	0	5
1.0691	1	0	5
0.8709	1	0	5
0.89996	1	0	5
0.68755	1	0	5
0.67034	1	0	5
1.035	1	0	5
1.0778	1	0	5
0.58769	1	0	5
0.66494	1	0	5
1.1115	1	0	5
1.0213	1	0	5
0.92588	1	0	5
1.1926	1	0	5
1.2907	1	0	5
1.1076	1	0	5
1.1402	1	0	5
1.2736	1	0	5
1.4401	1	0	5
1.3305	1	0	5
0.80646	1	0	5
0.98432	1	0	5
1.117	1	0	5
0.62661	1	0	5
0.92088	1	0	5
1.2421	1	0	5
1.389	1	0	5
1.0198	1	0	5
0.94894	1	0	5
1.0979	1	0	5
0.86746	1	0	5
0.81495	1	0	5
0.74557	1	0	5
0.56894	1	0	5
0.7144	1	0	5
0.57653	1	0	5
1.1174	1	0	5
1.4873	1	0	5
0.99264	1	0	5
0.93598	1	0	5
1.0537	1	0	5
1.2601	1	0	5
1.1186	1	0	5
1.0111	1	0	5
0.62851	1	0	5
0.66069	1	0	5
0.81715	1	0	5
0.96121	1	0	5
0.81192	1	0	5
0.81672	1	0	5
0.82157	1	0	5
0.98076	1	0	5
1.2716	1	0	5
0.78357	1	0	5
0.75009	1	0	5
0.85442	1	0	5
0.53827	1	0	5
0.89547	1	0	5
0.82297	1	0	5
0.78502	1	0	5
0.86328	1	0	5
0.86334	1	0	5
1.3128	1	0	5
1.1665	1	0	5
0.95838	1	0	5
1.7399	1	0	5
0.89058	1	0	5
0.66154	1	0	5
0.91832	1	0	5
0.64212	1	0	5
0.83234	1	0	5
0.70341	1	0	5
0.64231	1	0	5
0.79931	1	0	5
0.94623	1	0	5
0.98521	1	0	5
1.425	1	0	5
1.0396	1	0	5
1.3158	1	0	5
1.6179	1	0	5
1.6166	1	0	5
1.2765	1	0	5
1.236	1	0	5
0.96635	1	0	5
1.1919	1	0	5
1.1969	1	0	6
0.93084	1	0	6
1.1914	1	0	6
1.3199	1	0	6
1.5138	1	0	6
0.9989	1	0	6
0.89671	1	0	6
1.9027	1	0	6
2.0447	1	0	6
1.5561	1	0	6
0.90177	1	0	6
1.0078	1	0	6
0.79939	1	0	6
0.92111	1	0	6
1.5335	1	0	6
1.1377	1	0	6
1.0602	1	0	6
0.79358	1	0	6
1.0867	1	0	6
1.4104	1	0	6
1.5693	1	0	6
1.5684	1	0	6
1.3558	1	0	6
1.2555	1	0	6
1.1147	1	0	6
0.98227	1	0	6
1.0828	1	0	6
1.0595	1	0	6
0.85148	1	0	6
1.867	1	0	6
1.1968	1	0	6
1.0045	1	0	6
0.88824	1	0	6
1.0919	1	0	6
1.0724	1	0	6
0.86079	1	0	6
1.1186	1	0	6
1.1565	1	0	6
0.93423	1	0	6
1.1517	1	0	6
1.2583	1	0	6
1.8342	1	0	6
1.5735	1	0	6
2.039	1	0	6
1.8675	1	0	6
1.1589	1	0	6
0.79846	1	0	6
0.8248	1	0	6
0.70748	1	0	6
0.96038	1	0	6
1.0798	1	0	6
0.79842	1	0	6
1.21	1	0	6
1.4683	1	0	6
1.5054	1	0	6
1.22	1	0	6
1.553	1	0	6
1.2756	1	0	6
1.7353	1	0	6
1.3387	1	0	6
1.2933	1	0	6
1.4136	1	0	6
1.5916	1	0	6
1.3388	1	0	6
1.3827	1	0	6
1.1443	1	0	6
0.94526	1	0	6
0.70802	1	0	6
0.78309	1	0	6
0.82594	1	0	6
0.74513	1	0	6
0.86302	1	0	6
0.89548	1	0	6
1.0429	1	0	6
1.0495	1	0	6
0.98755	1	0	6
1.08	1	0	6
1.025	1	0	6
1.017	1	0	6
1.1457	1	0	6
0.74219	1	0	6
0.76136	1	0	6
0.8834	1	0	6
1.0239	1	0	6
0.73024	1	0	6
0.89822	1	0	6
0.8473	1	0	6
0.85342	1	0	6
0.78083	1	0	6
1.3391	1	0	6
1.0079	1	0	6
0.7505	1	0	6
0.89623	1	0	6
0.65669	1	0	6
0.87583	1	0	6
0.69643	1	0	6
0.85543	1	0	6
0.87576	1	0	6
1.2164	1	0	6
0.84506	1	0	6
0.74171	1	0	6
0.81191	1	0	6
0.82	1	0	6
0.87433	1	0	6
0.88489	1	0	6
0.9254	1	0	6
0.89483	1	0	6
0.81312	1	0	6
0.77562	1	0	6
1.3335	1	0	6
0.99715	1	0	6
0.88122	1	0	6
0.94799	1	0	6
0.87805	1	0	6
0.7764	1	0	6
0.61512	1	0	6
0.78524	1	0	6
0.65405	1	0	6
0.73005	1	0	6
0.78514	1	0	6
0.89822	1	0	6
0.6099	1	0	6
0.72193	1	0	6
1.1898	1	0	6
1.1736	1	0	6
0.71018	1	0	6
0.85671	1	0	6
0.93385	1	0	6
1.1561	1	0	6
1.291	1	0	6
1.0195	1	0	6
1.2054	1	0	6
1.185	1	0	6
1.1185	1	0	6
0.82554	1	0	6
0.89647	1	0	6
0.75661	1	0	6
0.78466	1	0	6
0.65349	1	0	6
0.74008	1	0	6
0.69099	1	0	6
0.93257	1	0	6
0.89272	1	0	6
0.83847	1	0	6
1.0423	1	0	6
0.8705	1	0	6
0.79014	1	0	6
0.83234	1	0	6
0.97945	1	0	6
0.83327	1	0	6
0.8679	1	0	6
0.84274	1	0	6
0.86702	1	0	6
0.79863	1	0	6
1.0867	1	0	6
1.0929	1	0	6
0.99736	1	0	6
1.0987	1	0	6
0.96392	1	0	6
1.0721	1	0	6
0.81585	1	0	6
0.68593	1	0	6
0.80121	1	0	6
1.1698	1	0	6
0.74465	1	0	6
0.63622	1	0	6
0.63375	1	0	6
0.59214	1	0	6
1.1745	1	0	6
1.1784	1	0	6
1.055	1	0	6
1.2846	1	0	6
0.87431	1	0	6
1.0119	1	0	6
0.71236	1	0	6
0.90943	1	0	6
1.0501	1	0	6
1.197	1	0	6
0.98744	1	0	6
2.1134	1	0	6
2.407	1	0	6
1.2003	1	0	6
0.82293	1	0	6
1.6327	1	0	6
1.0047	1	0	6
0.82283	1	0	6
0.8004	1	0	6
1.0067	1	0	6
1.4825	1	0	6
1.5073	1	0	6
1.0716	1	0	6
1.5222	1	0	6
1.544	1	0	6
1.642	1	0	6
0.83613	1	0	6
1.2856	1	0	6
1.1167	1	0	6
0.896	1	0	6
1.1035	1	0	6
1.1649	1	0	6
0.93939	1	0	6
1.0058	1	0	6
1.0882	1	0	6
0.94622	1	0	6
0.89108	1	0	6
0.90833	1	0	6
1.0165	1	0	6
1.4336	1	0	6
1.8931	1	0	6
1.2815	1	0	6
1.3633	1	0	6
1.6977	1	0	6
1.0999	1	0	6
0.88176	1	0	6
1.0562	1	0	6
1.3745	1	0	6
0.85115	1	0	6
1.3399	1	0	6
1.0909	1	0	6
1.2611	1	0	6
1.4404	1	0	6
1.3393	1	0	6
1.2995	1	0	6
1.2714	1	0	6
0.84276	1	0	6
1.0731	1	0	6
0.83028	1	0	6
1.0943	1	0	6
0.94729	1	0	6
1.2655	1	0	6
1.1102	1	0	6
0.80716	1	0	6
1.0313	1	0	6
0.72919	1	0	6
0.97202	1	0	6
0.86626	1	0	6
1.079	1	0	6
1.4885	1	0	6
1.2075	1	0	6
0.80991	1	0	6
0.70347	1	0	6
0.74645	1	0	6
0.63698	1	0	6
0.96668	1	0	6
0.8408	1	0	6
0.73252	1	0	6
0.83405	1	0	6
0.70659	1	0	6
0.63741	1	0	6
0.95037	1	0	6
1.0814	1	0	6
0.9185	1	0	6
0.76733	1	0	6
0.78261	1	0	6
0.81614	1	0	6
0.72429	1	0	6
1.0868	1	0	6
0.65879	1	0	6
0.79093	1	0	6
0.99948	1	0	6
0.72623	1	0	6
0.69582	1	0	6
0.77307	1	0	6
0.61891	1	0	6
0.85862	1	0	6
0.92771	1	0	6
0.93166	1	0	6
0.63968	1	0	6
0.80825	1	0	6
0.74715	1	0	6
0.83682	1	0	6
0.8133	1	0	6
0.70282	1	0	6
0.79256	1	0	6
0.63191	1	0	6
0.86975	1	0	6
0.62646	1	0	6
0.66032	1	0	6
0.70852	1	0	6
0.6931	1	0	6
0.93423	1	0	6
0.77284	1	0	6
0.93198	1	0	6
0.81688	1	0	6
0.9731	1	0	6
0.90329	1	0	6
0.75662	1	0	6
0.8185	1	0	6
0.88795	1	0	6
1.0195	1	0	7
1.1977	1	0	7
1.0325	1	0	7
0.96428	1	0	7
0.95367	1	0	7
1.0714	1	0	7
1.0381	1	0	7
1.1223	1	0	7
1.0038	1	0	7
0.98522	1	0	7
1.2841	1	0	7
1.0634	1	0	7
1.1977	1	0	7
1.6133	1	0	7
0.96671	1	0	7
0.96294	1	0	7
0.99581	1	0	7
1.1908	1	0	7
0.78377	1	0	7
0.97391	1	0	7
0.96206	1	0	7
0.98499	1	0	7
1.0122	1	0	7
2.1005	1	0	7
1.3326	1	0	7
1.1455	1	0	7
1.4054	1	0	7
1.4576	1	0	7
0.88092	1	0	7
0.83743	1	0	7
0.69791	1	0	7
0.88678	1	0	7
1.1088	1	0	7
1.3126	1	0	7
0.72111	1	0	7
0.91635	1	0	7
1.1614	1	0	7
0.81505	1	0	7
0.75849	1	0	7
1.7538	1	0	7
1.3203	1	0	7
1.3752	1	0	7
0.94502	1	0	7
1.3322	1	0	7
1.1706	1	0	7
1.1645	1	0	7
2.0051	1	0	7
1.0095	1	0	7
1.0142	1	0	7
1.0084	1	0	7
1.2494	1	0	7
1.5562	1	0	7
1.4224	1	0	7
1.4528	1	0	7
0.78092	1	0	7
0.91016	1	0	7
1.1582	1	0	7
1.3827	1	0	7
0.90652	1	0	7
1.0122	1	0	7
0.9294	1	0	7
1.0008	1	0	7
1.0309	1	0	7
1.2917	1	0	7
1.7238	1	0	7
1.3428	1	0	7
1.8339	1	0	7
1.8551	1	0	7
1.525	1	0	7
1.3794	1	0	7
1.9409	1	0	7
1.2865	1	0	7
0.80985	1	0	7
1.1652	1	0	7
0.9796	1	0	7
0.73509	1	0	7
0.86931	1	0	7
0.85301	1	0	7
1.1514	1	0	7
0.82574	1	0	7
1.0784	1	0	7
1.2797	1	0	7
0.93271	1	0	7
0.91238	1	0	7
0.91736	1	0	7
0.75738	1	0	7
1.0049	1	0	7
0.73883	1	0	7
0.8469	1	0	7
0.84744	1	0	7
0.83184	1	0	7
0.87396	1	0	7
0.81716	1	0	7
1.2949	1	0	7
1.1445	1	0	7
0.93634	1	0	7
0.90094	1	0	7
1.5794	1	0	7
0.74073	1	0	7
1.1475	1	0	7
1.2651	1	0	7
1.1449	1	0	7
1.3303	1	0	7
0.86974	1	0	7
0.79043	1	0	7
0.73627	1	0	7
1.3336	1	0	7
1.4953	1	0	7
0.58802	1	0	7
1.316	1	0	7
0.8522	1	0	7
0.87448	1	0	7
1.2004	1	0	7
1.1128	1	0	7
1.9111	1	0	8
1.1752	1	0	8
1.0762	1	0	8
1.6873	1	0	8
1.423	1	0	8
1.0464	1	0	8
1.0066	1	0	8
1.2	1	0	8
0.71423	1	0	8
0.69735	1	0	8
1.0513	1	0	8
0.90463	1	0	8
1.0502	1	0	8
0.75311	1	0	8
0.64289	1	0	8
1.0191	1	0	8
0.73397	1	0	8
0.98619	1	0	8
0.87464	1	0	8
0.59392	1	0	8
0.96978	1	0	8
1.2928	1	0	8
1.1008	1	0	8
0.94602	1	0	8
0.62065	1	0	8
0.968	1	0	8
0.62218	1	0	8
1.1345	1	0	8
0.94259	1	0	8
1.169	1	0	8
0.7607	1	0	8
0.98709	1	0	8
0.94491	1	0	8
0.72999	1	0	8
0.82148	1	0	8
1.0472	1	0	8
1.0119	1	0	8
1.2203	1	0	8
0.95131	1	0	8
0.78443	1	0	8
0.98165	1	0	8
1.252	1	0	8
0.82508	1	0	8
1.1617	1	0	8
1.0008	1	0	8
0.88291	1	0	8
0.89547	1	0	8
0.49857	1	0	8
0.7974	1	0	8
0.91981	1	0	8
0.86001	1	0	8
0.78569	1	0	8
1.1071	1	0	8
0.8928	1	0	8
0.63619	1	0	8
1.1247	1	0	8
1.2341	1	0	8
1.0173	1	0	8
1.0782	1	0	8
1.1794	1	0	8
0.53738	1	0	8
0.72412	1	0	8
0.63017	1	0	8
0.67535	1	0	8
1.0323	1	0	8
1.3655	1	0	8
1.1139	1	0	8
0.57003	1	0	8
1.2112	1	0	8
1.136	1	0	8
1.0064	1	0	8
1.1517	1	0	8
1.2319	1	0	8
1.254	1	0	8
0.62306	1	0	8
0.92625	1	0	8
0.58803	1	0	8
0.66567	1	0	8
0.93836	1	0	8
0.96326	1	0	8
0.92832	1	0	8
0.97941	1	0	8
1.2092	1	0	8
1.3171	1	0	8
1.0905	1	0	8
0.65122	1	0	8
0.92411	1	0	8
1.1963	1	0	8
1.3721	1	0	8
0.90337	1	0	8
1.1116	1	0	8
0.81254	1	0	8
0.69428	1	0	8
1.1296	1	0	8
0.97346	1	0	8
0.97451	1	0	8
0.98338	1	0	8
0.77115	1	0	8
0.80614	1	0	8
1.3396	1	0	8
0.71022	1	0	8
0.73073	1	0	8
1.2185	1	0	8
0.86558	1	0	8
0.90102	1	0	8
1.0207	1	0	8
0.82248	1	0	8
0.97679	1	0	8
0.94838	1	0	8
0.91005	1	0	8
1.5269	1	0	8
1.2628	1	0	8
1.0478	1	0	8
1.2903	1	0	8
0.93171	1	0	8
0.99148	1	0	8
1.0517	1	0	8
0.83688	1	0	8
0.70135	1	0	8
0.67582	1	0	8
0.89619	1	0	8
0.84074	1	0	8
0.86857	1	0	8
1.3159	1	0	8
1.1428	1	0	8
0.79688	1	0	8
0.86777	1	0	8
0.90721	1	0	8
0.63269	1	0	8
1.1113	1	0	8
0.53131	1	0	8
0.66332	1	0	8
1.0079	1	0	8
1.1338	1	0	8
0.91546	1	0	8
0.81876	1	0	8
0.97527	1	0	8
0.89987	1	0	8
0.82268	1	0	8
1.1434	1	0	8
1.2035	1	0	8
1.1922	1	0	8
0.82728	1	0	8
1.2977	1	0	8
1.5414	1	0	8
1.1662	1	0	8
0.97976	1	0	8
0.89689	1	0	8
1.0114	1	0	8
1.0414	1	0	8
0.94622	1	0	8
0.93499	1	0	8
1.2306	1	0	8
0.84177	1	0	8
1.0482	1	0	8
1.0174	1	0	8
0.97766	1	0	8
0.92061	1	0	8
0.918	1	0	8
1.0728	1	0	8
0.94358	1	0	8
1.0548	1	0	8
1.0742	1	0	8
0.90129	1	0	8
1.0627	1	0	8
1.2365	1	0	8
1.0179	1	0	8
1.3337	1	0	8
1.0235	1	0	8
1.0254	1	0	8
0.89193	1	0	8
0.91975	1	0	8
0.856	1	0	8
0.89763	1	0	8
0.86468	1	0	8
0.95036	1	0	8
0.8646	1	0	8
0.77001	1	0	8
0.87334	1	0	8
0.62037	1	0	8
0.80975	1	0	8
1.136	1	0	8
0.89214	1	0	8
1.0119	1	0	8
0.83527	1	0	8
0.83603	1	0	8
0.9685	1	0	8
0.91531	1	0	8
0.75259	1	0	8
1.0079	1	0	8
1.083	1	0	8
0.96269	1	0	8
1.0867	1	0	8
1.0082	1	0	8
1.5435	1	0	8
0.97428	1	0	8
1.0241	1	0	8
1.2652	1	0	8
0.94638	1	0	8
0.87173	1	0	8
1.0919	1	0	8
1.0278	1	0	8
0.88397	1	0	8
0.85313	1	0	8
0.97164	1	0	8
1.0221	1	0	8
1.5341	1	0	8
1.1756	1	0	8
1.0585	1	0	8
0.91374	1	0	8
0.94564	1	0	8
1.1153	1	0	8
0.7476	1	0	8
1.0923	1	0	8
1.2425	1	0	8
1.2192	1	0	8
1.089	1	0	8
1.2044	1	0	8
0.9647	1	0	8
1.0659	1	0	8
1.0961	1	0	8
1.1104	1	0	8
1.0497	1	0	8
0.99161	1	0	8
1.0883	1	0	8
0.96494	1	0	8
0.993	1	0	8
1.0991	1	0	8
1.1395	1	0	8
0.72819	1	0	8
0.98143	1	0	8
1.0737	1	0	8
1.0194	1	0	8
0.9694	1	0	8
0.81791	1	0	8
1.1219	1	0	8
0.68715	1	0	8
0.77224	1	0	8
1.1018	1	0	8
1.0144	1	0	8
1.2292	1	0	8
1.1697	1	0	8
1.1055	1	0	8
1.045	1	0	8
1.0635	1	0	8
0.68824	1	0	8
1.114	1	0	8
0.96535	1	0	8
1.3285	1	0	8
1.2468	1	0	8
0.78676	1	0	8
0.72241	1	0	8
0.73868	1	0	8
0.64728	1	0	8
1.2554	1	0	8
1.1703	1	0	8
1.0514	1	0	8
1.2154	1	0	8
1.0334	1	0	8
1.0686	1	0	8
0.79567	1	0	8
1.0065	1	0	8
1.1867	1	0	8
1.7111	1	0	8
1.3953	1	0	8
0.91851	1	0	8
1.5577	1	0	8
1.0401	1	0	8
0.77288	1	0	8
1.1523	1	0	8
1.4088	1	0	8
1.2883	1	0	8
1.2605	1	0	8
1.2173	1	0	8
1.1182	1	0	8
1.0923	1	0	8
1.0391	1	0	8
0.91583	1	0	8
1.3799	1	0	8
0.76825	1	0	8
1.5424	1	0	8
1.5437	1	0	8
0.81575	1	0	8
0.70669	1	0	8
0.97949	1	0	8
1.0583	1	0	8
1.0841	1	0	8
0.95804	1	0	8
0.9	1	0	8
0.9544	1	0	8
0.87937	1	0	8
0.89836	1	0	8
1.0408	1	0	8
0.98583	1	0	8
1.0344	1	0	8
0.94742	1	0	8
0.91368	1	0	8
1.0572	1	0	8
0.91476	1	0	8
1.2363	1	0	8
1.1885	1	0	8
0.71651	1	0	8
0.89745	1	0	8
1.18	1	0	8
1.066	1	0	8
0.95578	1	0	8
0.88233	1	0	8
0.89687	1	0	8
1.0373	1	0	8
0.70782	1	0	8
0.79728	1	0	8
0.87057	1	0	8
0.76625	1	0	8
0.76475	1	0	8
0.65858	1	0	8
0.67012	1	0	8
0.82717	1	0	8
0.64122	1	0	8
0.90709	1	0	8
0.77286	1	0	8
1.125	1	0	8
0.97228	1	0	8
1.1401	1	0	8
0.92967	1	0	8
0.93064	1	0	8
1.0513	1	0	8
0.7781	1	0	8
0.97276	1	0	8
1.1457	1	0	8
0.98952	1	0	8
0.76682	1	0	8
0.84305	1	0	8
1.2314	1	0	8
0.89244	1	0	8
1.0586	1	0	8
1.3863	1	0	8
1.584	1	0	8
1.7522	1	0	8
1.212	1	0	8
1.1576	1	0	8
1.1876	1	0	8
0.71546	1	0	8
1.0742	1	0	8
0.68435	1	0	8
1.0446	1	0	8
1.068	1	0	8
0.93966	1	0	8
0.98046	1	0	8
1.033	1	0	8
1.0499	1	0	8
0.70344	1	0	8
1.0835	1	0	8
1.1852	1	0	8
0.83922	1	0	8
1.1249	1	0	8
0.95524	1	0	8
1.2489	1	0	8
1.2274	1	0	8
1.0564	1	0	8
1.0025	1	0	8
0.60719	1	0	8
0.77758	1	0	8
0.86894	1	0	8
0.95591	1	0	8
0.62256	1	0	8
0.78618	1	0	8
0.77035	1	0	8
1.5629	1	0	8
0.73611	1	0	8
0.61306	1	0	8
0.58924	1	0	8
0.95027	1	0	8
0.92517	1	0	8
0.68487	1	0	8
0.95545	1	0	8
1.186	1	0	8
1.3892	1	0	8
1.2759	1	0	8
0.84234	1	0	8
0.62492	1	0	8
0.87401	1	0	8
0.68875	1	0	8
0.64748	1	0	8
0.73731	1	0	8
0.76387	1	0	8
0.86733	1	0	8
1.0101	1	0	8
1.1087	1	0	8
1.2268	1	0	8
1.1918	1	0	8
0.91527	1	0	8
1.1202	1	0	8
1.2183	1	0	8
1.0551	1	0	8
0.99004	1	0	8
1.2289	1	0	8
1.5141	1	0	8
1.2749	1	0	8
1.1814	1	0	8
0.62106	1	0	8
1.0047	1	0	8
1.5301	1	0	8
1.5588	1	0	8
0.89298	1	0	8
1.0318	1	0	8
1.0413	1	0	8
0.83666	1	0	8
1.1927	1	0	8
1.1872	1	0	8
1.3488	1	0	8
1.493	1	0	8
1.3214	1	0	8
1.4495	1	0	8
1.3188	1	0	8
1.1786	1	0	8
1.4758	1	0	8
0.93494	1	0	8
1.2745	1	0	8
1.4181	1	0	8
2.209	1	1	1
1.6361	1	1	1
2.1035	1	1	1
1.889	1	1	1
1.3882	1	1	1
1.6554	1	1	1
1.8071	1	1	1
1.9585	1	1	1
2.206	1	1	1
1.491	1	1	1
2.0755	1	1	1
1.7512	1	1	1
1.9314	1	1	1
1.7456	1	1	1
1.883	1	1	1
2.2391	1	1	1
1.9039	1	1	1
2.003	1	1	1
2.1523	1	1	1
2.0266	1	1	1
1.9487	1	1	1
1.9754	1	1	1
1.6798	1	1	1
1.7724	1	1	1
2.1925	1	1	1
2.0963	1	1	1
2.1524	1	1	1
1.9901	1	1	1
2.1775	1	1	1
2.2241	1	1	1
2.0605	1	1	1
2.1292	1	1	1
2.1027	1	1	1
2.5646	1	1	1
2.528	1	1	1
1.7162	1	1	1
2.7832	1	1	1
2.2155	1	1	1
2.3454	1	1	1
2.5762	1	1	1
2.3524	1	1	1
2.0136	1	1	1
2.6346	1	1	1
2.274	1	1	1
2.5859	1	1	1
2.3944	1	1	1
2.3585	1	1	1
2.2236	1	1	1
2.2413	1	1	1
2.112	1	1	1
2.3313	1	1	1
1.9307	1	1	1
2.3009	1	1	1
2.1134	1	1	1
2.2806	1	1	1
2.4323	1	1	1
2.496	1	1	1
2.0063	1	1	1
2.271	1	1	1
2.3984	1	1	1
2.2831	1	1	1
2.355	1	1	1
2.2291	1	1	1
2.5069	1	1	1
2.519	1	1	1
2.619	1	1	1
2.1403	1	1	1
2.1984	1	1	1
2.2109	1	1	1
2.0368	1	1	1
2.1876	1	1	1
2.2416	1	1	1
2.1074	1	1	1
2.3917	1	1	1
2.5018	1	1	1
1.9543	1	1	1
2.3367	1	1	1
2.3649	1	1	1
1.9028	1	1	1
2.3729	1	1	1
2.1321	1	1	1
2.1504	1	1	1
2.3909	1	1	1
2.0933	1	1	1
2.1703	1	1	1
1.711	1	1	1
2.0603	1	1	1
2.3467	1	1	1
1.9684	1	1	1
2.2156	1	1	1
2.1011	1	1	1
2.059	1	1	1
2.0636	1	1	1
1.9767	1	1	1
1.9812	1	1	1
1.6611	1	1	1
2.0527	1	1	1
2.3969	1	1	1
2.23	1	1	1
2.2608	1	1	1
2.6526	1	1	1
2.7512	1	1	1
2.3279	1	1	1
2.1923	1	1	1
2.0034	1	1	1
2.1395	1	1	1
2.4805	1	1	1
2.2212	1	1	1
2.6774	1	1	1
2.4933	1	1	1
2.387	1	1	1
2.3786	1	1	1
2.6386	1	1	1
2.4977	1	1	1
2.5468	1	1	1
2.4536	1	1	1
2.5306	1	1	1
2.275	1	1	1
2.9924	1	1	1
2.3357	1	1	1
2.362	1	1	1
2.3238	1	1	1
2.0295	1	1	1
2.5373	1	1	1
1.7802	1	1	1
2.6658	1	1	1
2.2755	1	1	1
2.8088	1	1	1
1.6276	1	1	1
2.2446	1	1	1
1.9779	1	1	1
1.7478	1	1	1
1.9787	1	1	1
1.5549	1	1	1
2.4094	1	1	1
2.1958	1	1	1
1.6222	1	1	1
2.133	1	1	1
2.1456	1	1	1
1.4286	1	1	1
2.1216	1	1	1
2.3743	1	1	1
2.1748	1	1	1
1.6123	1	1	1
1.7304	1	1	1
2.1883	1	1	1
1.8686	1	1	1
2.3243	1	1	1
2.2494	1	1	1
1.9391	1	1	1
1.8441	1	1	1
1.4449	1	1	1
2.5087	1	1	1
2.3014	1	1	1
2.0642	1	1	1
2.2383	1	1	1
2.5756	1	1	1
2.5228	1	1	1
2.0792	1	1	1
2.4887	1	1	1
2.1704	1	1	1
2.204	1	1	1
2.2887	1	1	1
2.1209	1	1	1
2.0908	1	1	1
1.8905	1	1	1
2.2223	1	1	1
2.2656	1	1	1
2.2441	1	1	1
2.3501	1	1	1
2.1977	1	1	1
1.8771	1	1	1
1.4966	1	1	1
2.1051	1	1	1
1.6511	1	1	1
1.9525	1	1	1
1.6402	1	1	1
1.9145	1	1	1
1.8109	1	1	1
1.7874	1	1	1
1.8669	1	1	1
1.911	1	1	1
1.9714	1	1	1
1.6897	1	1	1
2.2586	1	1	1
2.4936	1	1	1
1.9766	1	1	1
2.1729	1	1	1
2.1115	1	1	1
2.3779	1	1	1
1.9583	1	1	1
1.9246	1	1	1
2.209	1	1	1
1.4859	1	1	1
1.4433	1	1	1
2.0439	1	1	1
1.8938	1	1	1
2.1463	1	1	1
2.3017	1	1	1
2.4594	1	1	1
2.4426	1	1	1
2.1557	1	1	1
2.1602	1	1	1
2.0872	1	1	1
2.3131	1	1	1
1.6071	1	1	1
1.8328	1	1	1
2.0882	1	1	1
1.8781	1	1	1
1.9159	1	1	1
1.6491	1	1	1
1.7648	1	1	1
1.9145	1	1	1
2.6578	1	1	1
2.138	1	1	1
2.0517	1	1	1
2.347	1	1	1
2.2012	1	1	1
2.1833	1	1	1
2.1683	1	1	1
2.1261	1	1	1
2.2177	1	1	1
1.8376	1	1	1
2.2003	1	1	1
1.5852	1	1	1
1.346	1	1	1
2.2058	1	1	1
2.301	1	1	1
2.0857	1	1	1
1.7329	1	1	1
1.5226	1	1	1
1.6427	1	1	1
2.0779	1	1	1
2.0097	1	1	1
1.987	1	1	1
1.9912	1	1	1
1.989	1	1	1
1.9044	1	1	1
2.0016	1	1	1
1.3795	1	1	2
1.9433	1	1	2
1.5133	1	1	2
1.4528	1	1	2
1.4263	1	1	2
1.6093	1	1	2
1.7804	1	1	2
1.5022	1	1	2
1.5334	1	1	2
1.811	1	1	2
1.7742	1	1	2
1.3468	1	1	2
1.2732	1	1	2
1.6262	1	1	2
1.5412	1	1	2
1.7231	1	1	2
1.3656	1	1	2
1.5128	1	1	2
1.5254	1	1	2
1.4293	1	1	2
1.7008	1	1	2
1.4302	1	1	2
1.8041	1	1	2
1.7521	1	1	2
1.728	1	1	2
1.4364	1	1	2
1.0662	1	1	2
1.8259	1	1	2
1.5999	1	1	2
1.5448	1	1	2
1.4668	1	1	2
1.7109	1	1	2
1.3377	1	1	2
1.5962	1	1	2
1.567	1	1	2
1.9603	1	1	2
1.8393	1	1	2
1.5024	1	1	2
1.9152	1	1	2
1.4221	1	1	2
1.3809	1	1	2
1.5743	1	1	2
0.96489	1	1	2
1.2957	1	1	2
1.3371	1	1	2
1.549	1	1	2
1.3751	1	1	2
1.4161	1	1	2
1.7661	1	1	2
1.5754	1	1	2
1.3487	1	1	2
1.6522	1	1	2
1.3138	1	1	2
1.5067	1	1	2
1.324	1	1	2
1.4677	1	1	2
1.763	1	1	2
1.3808	1	1	2
1.3314	1	1	2
1.6608	1	1	2
1.6254	1	1	2
1.8388	1	1	2
1.16	1	1	2
1.8339	1	1	2
1.6437	1	1	2
1.6743	1	1	2
1.524	1	1	2
1.2829	1	1	2
1.1527	1	1	2
1.0936	1	1	2
1.6264	1	1	2
1.3923	1	1	2
1.901	1	1	2
2.1719	1	1	2
1.7225	1	1	2
1.0698	1	1	2
2.319	1	1	2
1.6898	1	1	2
0.97258	1	1	2
2.1638	1	1	2
1.5349	1	1	2
1.1832	1	1	2
1.9575	1	1	2
2.1376	1	1	2
2.0009	1	1	2
1.6001	1	1	2
1.2614	1	1	2
1.1772	1	1	2
1.2846	1	1	2
1.5355	1	1	2
1.9846	1	1	2
2.0331	1	1	2
1.6753	1	1	2
1.3632	1	1	2
1.0696	1	1	2
1.277	1	1	2
1.5111	1	1	2
1.8834	1	1	2
1.4686	1	1	2
1.391	1	1	2
2.1238	1	1	2
1.1973	1	1	2
1.6828	1	1	2
1.2193	1	1	2
2.2082	1	1	2
2.4086	1	1	2
2.0486	1	1	2
1.8889	1	1	2
1.8123	1	1	2
1.1134	1	1	2
1.6947	1	1	2
1.2846	1	1	2
1.963	1	1	2
1.7913	1	1	2
1.7189	1	1	2
1.7378	1	1	2
1.2613	1	1	2
2.443	1	1	2
1.905	1	1	2
2.2955	1	1	2
1.9135	1	1	2
1.7616	1	1	2
[truncated: 13,974 more rows]
