# Supplementary material for: Breakdown of local information processing may underlie isoflurane anesthesia effects
Source: PLoS Comput Biol. 2017 Jun 1;13(6):e1005511. doi: 10.1371/journal.pcbi.1005511 (PMC5453425; doi:10.1371/journal.pcbi.1005511)
Supplement: S1 Dataset — (ZIP) [file pcbi.1005511.s001.zip › ferret_1_ais_ksg_raw_median.csv]

raw data	data z_scored	factor direction	factor anesthesia
1.4	-0.24916	1	1
1.1645	-0.86566	1	1
1.1217	-0.97774	1	1
0.96283	-1.3938	1	1
0.92044	-1.5048	1	1
0.93423	-1.4687	1	1
1.0252	-1.2305	1	1
0.98952	-1.3239	1	1
2.1456	1.703	2	1
1.5707	0.19772	2	1
1.8381	0.89798	2	1
1.6655	0.44599	2	1
1.7434	0.65001	2	1
1.3081	-0.48982	2	1
1.7927	0.77911	2	1
1.4387	-0.14784	2	1
1.0435	-1.1826	1	2
0.97558	-1.3604	1	2
1.8712	0.98453	1	2
1.7364	0.63155	1	2
1.6218	0.33164	1	2
1.4019	-0.24408	2	2
1.4139	-0.21277	2	2
1.1967	-0.78152	2	2
1.0251	-1.2308	2	2
0.9661	-1.3852	2	2
1.7606	0.69493	1	3
1.7166	0.57988	1	3
1.4678	-0.071748	1	3
1.8609	0.95762	1	3
2.0258	1.3894	1	3
2.2044	1.8569	1	3
2.1491	1.7121	1	3
2.1037	1.5933	1	3
1.9193	1.1105	1	3
1.9069	1.078	1	3
1.4514	-0.11449	2	3
1.7003	0.53708	2	3
1.6384	0.37516	2	3
1.6796	0.48292	2	3
1.6013	0.27785	2	3
1.5925	0.25499	2	3
1.2144	-0.73498	2	3
1.4698	-0.066441	2	3
0.95843	-1.4053	2	3
1.0826	-1.0801	2	3
