# Supplementary material for: Breakdown of local information processing may underlie isoflurane anesthesia effects
Source: PLoS Comput Biol. 2017 Jun 1;13(6):e1005511. doi: 10.1371/journal.pcbi.1005511 (PMC5453425; doi:10.1371/journal.pcbi.1005511)
Supplement: S1 Dataset — (ZIP) [file pcbi.1005511.s001.zip › ferret_1_ais_nsb_mean_param_interaction.csv]

mean PFC	sem PFC	mean V1	sem V1
1.7767	0.015007	1.5924	0.078978
1.7021	0.029325	1.7618	0.031856
1.7079	0.021629	1.7967	0.013119
