# Supplementary material for: Breakdown of local information processing may underlie isoflurane anesthesia effects
Source: PLoS Comput Biol. 2017 Jun 1;13(6):e1005511. doi: 10.1371/journal.pcbi.1005511 (PMC5453425; doi:10.1371/journal.pcbi.1005511)
Supplement: S1 Dataset — (ZIP) [file pcbi.1005511.s001.zip › ferret_1_ais_nsb_raw_mean.csv]

raw data	factor direction	factor anesthesia
1.7064	1	1
1.8031	1	1
1.7984	1	1
1.7663	1	1
1.7894	1	1
1.7963	1	1
1.5826	2	1
1.7407	2	1
1.4816	2	1
1.7319	2	1
1.753	2	1
1.2645	2	1
1.7551	1	2
1.7018	1	2
1.6204	1	2
1.7309	1	2
1.6694	2	2
1.8096	2	2
1.7975	2	2
1.7707	2	2
1.763	1	3
1.7579	1	3
1.7531	1	3
1.7555	1	3
1.6623	1	3
1.7221	1	3
1.6131	1	3
1.6365	1	3
1.7197	2	3
1.7977	2	3
1.7782	2	3
1.8134	2	3
1.8242	2	3
1.8449	2	3
1.7989	2	3
1.7969	2	3
