# Supplementary material for: Breakdown of local information processing may underlie isoflurane anesthesia effects
Source: PLoS Comput Biol. 2017 Jun 1;13(6):e1005511. doi: 10.1371/journal.pcbi.1005511 (PMC5453425; doi:10.1371/journal.pcbi.1005511)
Supplement: S1 Dataset — (ZIP) [file pcbi.1005511.s001.zip › ferret_1_h_ksg_median_param_interaction.csv]

mean PFC	sem PFC	mean V1	sem V1
1.2087	0.13098	-0.46858	0.24696
0.13888	0.41733	0.6952	0.232
-1.0897	0.16952	0.080624	0.24903
