# Supplementary material for: Breakdown of local information processing may underlie isoflurane anesthesia effects
Source: PLoS Comput Biol. 2017 Jun 1;13(6):e1005511. doi: 10.1371/journal.pcbi.1005511 (PMC5453425; doi:10.1371/journal.pcbi.1005511)
Supplement: S1 Dataset — (ZIP) [file pcbi.1005511.s001.zip › ferret_1_h_ksg_raw_lmm.csv]

raw data	factor anesthesia	factor direction	factor recording
0.29094	1	0	1
-2.3263	1	0	1
-1.0971	1	0	1
1.5601	1	0	1
2.4511	1	0	1
1.9075	1	0	1
1.308	1	0	1
1.5341	1	0	1
-0.12193	1	0	1
0.82981	1	0	1
1.2411	1	0	1
2.4736	1	0	1
0.96794	1	0	1
7.8691	1	0	1
-4.5412	1	0	1
1.3515	1	0	1
1.7953	1	0	1
1.6826	1	0	1
2.2337	1	0	1
1.7201	1	0	1
-3.451	1	0	1
1.4944	1	0	1
1.5449	1	0	1
1.5485	1	0	1
0.54077	1	0	1
-1.0413	1	0	1
-1.8164	1	0	1
-1.6605	1	0	1
-1.6436	1	0	1
-1.9207	1	0	1
-1.1732	1	0	1
-1.1305	1	0	1
-1.8418	1	0	1
-2.1683	1	0	1
-2.0445	1	0	1
-3.6781	1	0	1
-4.25	1	0	1
-1.9683	1	0	1
-3.008	1	0	1
-2.3788	1	0	1
-2.3518	1	0	1
-2.7089	1	0	1
-2.7145	1	0	1
-2.8773	1	0	1
-2.6835	1	0	1
-2.8248	1	0	1
-3.2887	1	0	1
-3.7906	1	0	1
-3.4769	1	0	1
-2.8758	1	0	1
-2.886	1	0	1
-3.0436	1	0	1
-3.4053	1	0	1
-3.3004	1	0	1
-3.1912	1	0	1
-2.1207	1	0	1
-3.033	1	0	1
-2.9978	1	0	1
-2.3581	1	0	1
-3.5621	1	0	1
-3.4191	1	0	1
-3.2841	1	0	1
-2.3731	1	0	1
-2.0193	1	0	1
-1.9678	1	0	1
-2.9281	1	0	1
-2.2342	1	0	1
-2.3438	1	0	1
-1.7159	1	0	1
-1.7486	1	0	1
-2.051	1	0	1
-1.6116	1	0	1
-2.1514	1	0	1
-1.9718	1	0	1
-1.2507	1	0	1
-1.5461	1	0	1
-1.5306	1	0	1
-1.9101	1	0	1
-2.6569	1	0	1
-2.2995	1	0	1
-2.1796	1	0	1
-2.6534	1	0	1
-1.8548	1	0	1
-0.90134	1	0	1
-1.2607	1	0	1
-1.6375	1	0	1
-2.2918	1	0	1
-2.3889	1	0	1
-2.54	1	0	1
-1.2842	1	0	1
-0.91391	1	0	1
-0.8212	1	0	1
-0.65451	1	0	1
-0.62829	1	0	1
-0.80323	1	0	1
-0.33832	1	0	1
-0.002289	1	0	1
-0.8892	1	0	1
-0.087773	1	0	1
-1.7503	1	0	1
-0.77113	1	0	1
-0.53162	1	0	1
-0.90259	1	0	1
-0.11767	1	0	1
-0.47882	1	0	1
-1.3883	1	0	1
-1.4333	1	0	1
-0.93211	1	0	1
-0.37723	1	0	1
-0.6895	1	0	1
-1.1	1	0	1
-0.73494	1	0	1
-0.60004	1	0	1
-2.0071	1	0	1
-0.43818	1	0	1
-0.14684	1	0	1
-1.165	1	0	1
-1.3078	1	0	1
0.15651	1	0	1
-1.1156	1	0	1
-1.3872	1	0	1
-2.5666	1	0	1
-0.54008	1	0	1
-1.7319	1	0	1
-3.6371	1	0	1
-1.3468	1	0	1
-3.6292	1	0	1
-1.0113	1	0	1
-0.59545	1	0	1
-0.036916	1	0	1
0.42629	1	0	1
0.35646	1	0	1
-0.026645	1	0	1
0.53653	1	0	1
0.32401	1	0	1
-0.1737	1	0	1
-0.10586	1	0	1
0.67395	1	0	1
-0.16679	1	0	1
1.0901	1	0	1
1.0777	1	0	1
1.4671	1	0	1
0.87928	1	0	1
1.3812	1	0	1
1.0542	1	0	1
0.95429	1	0	1
0.56876	1	0	1
0.39021	1	0	1
0.42729	1	0	1
0.53984	1	0	1
0.24284	1	0	1
1.1304	1	0	1
1.4636	1	0	1
1.5529	1	0	1
1.3859	1	0	1
-0.17091	1	0	1
1.0909	1	0	1
1.7971	1	0	1
1.5048	1	0	1
0.35216	1	0	1
0.7248	1	0	1
-5.3617	1	0	1
-3.3813	1	0	1
-0.53375	1	0	1
-0.26654	1	0	1
-1.5238	1	0	1
-6.0625	1	0	1
-2.5387	1	0	1
-1.0334	1	0	1
-4.9287	1	0	1
-10.768	1	0	1
-1.1491	1	0	1
-0.38316	1	0	1
0.66419	1	0	1
0.5853	1	0	1
1.4778	1	0	1
0.62862	1	0	1
2.0213	1	0	1
0.28482	1	0	1
0.91186	1	0	1
1.1588	1	0	1
1.7756	1	0	1
1.4671	1	0	1
0.45016	1	0	1
0.99518	1	0	1
1.5057	1	0	1
1.1758	1	0	1
1.1024	1	0	1
1.0933	1	0	1
0.84435	1	0	1
1.6892	1	0	1
1.3671	1	0	1
0.66919	1	0	1
-0.062928	1	0	1
1.402	1	0	1
1.8035	1	0	1
0.94739	1	0	1
1.0912	1	0	1
1.1964	1	0	1
0.63635	1	0	1
1.8734	1	0	1
1.1751	1	0	1
1.2861	1	0	1
1.6692	1	0	1
1.3081	1	0	1
0.63616	1	0	1
1.0017	1	0	1
1.2246	1	0	1
1.7627	1	0	1
1.0853	1	0	1
0.7194	1	0	1
1.0934	1	0	1
1.3134	1	0	1
1.1868	1	0	1
0.89656	1	0	1
1.8417	1	0	1
0.90493	1	0	1
1.5816	1	0	1
2.042	1	0	1
1.1881	1	0	1
0.66145	1	0	1
1.3205	1	0	1
1.0188	1	0	1
1.9427	1	0	1
2.2733	1	0	1
0.36413	1	0	1
1.6493	1	0	1
1.5693	1	0	1
0.65911	1	0	1
1.2156	1	0	1
1.4944	1	0	1
0.9682	1	0	1
1.9973	1	0	1
0.94194	1	0	1
1.9336	1	0	1
1.7893	1	0	1
1.4278	1	0	1
1.2183	1	0	1
1.4913	1	0	1
1.0257	1	0	1
0.65457	1	0	1
1.4249	1	0	1
1.0834	1	0	1
0.6878	1	0	1
3.7532	1	0	2
3.4281	1	0	2
3.9184	1	0	2
-1.3077	1	0	2
2.6929	1	0	2
3.3272	1	0	2
7.4616	1	0	2
4.3872	1	0	2
0.17601	1	0	2
1.2053	1	0	2
3.8068	1	0	2
-0.10926	1	0	2
6.0371	1	0	2
5.1142	1	0	2
-3.8917	1	0	2
2.7476	1	0	2
-0.70018	1	0	2
5.8305	1	0	2
3.3113	1	0	2
-1.5466	1	0	2
2.6415	1	0	2
8.0347	1	0	2
7.1509	1	0	2
-0.53863	1	0	2
7.327	1	0	2
-3.3394	1	0	2
-10.887	1	0	2
8.0635	1	0	2
-16.689	1	0	2
7.5312	1	0	2
6.5898	1	0	2
6.494	1	0	2
-0.96412	1	0	2
1.6729	1	0	2
7.8964	1	0	2
7.7197	1	0	2
4.0715	1	0	2
4.2639	1	0	2
-0.23536	1	0	2
-4.9497	1	0	2
-0.03979	1	0	2
2.12	1	0	2
7.8808	1	0	2
3.6708	1	0	2
6.2081	1	0	2
-1.9884	1	0	2
-2.0175	1	0	2
7.0457	1	0	2
7.7154	1	0	2
-0.70547	1	0	2
0.21235	1	0	2
-2.067	1	0	2
-6.5071	1	0	2
6.4594	1	0	2
7.7946	1	0	2
-1.5548	1	0	2
1.5494	1	0	2
-5.7374	1	0	2
5.749	1	0	2
-1.7327	1	0	2
0.88516	1	0	2
3.0144	1	0	2
6.7592	1	0	2
-4.7828	1	0	2
1.9822	1	0	2
-9.3712	1	0	2
-0.58191	1	0	2
-0.0029646	1	0	2
1.7996	1	0	2
3.7764	1	0	2
6.5874	1	0	2
-1.8642	1	0	2
-6.8039	1	0	2
-3.8453	1	0	2
1.6882	1	0	2
3.7983	1	0	2
3.2667	1	0	2
2.4478	1	0	2
7.7825	1	0	2
4.4907	1	0	2
-8.894	1	0	2
-7.178	1	0	2
-12.354	1	0	2
5.4874	1	0	2
6.3891	1	0	2
2.0146	1	0	2
0.23247	1	0	2
7.7425	1	0	2
4.328	1	0	2
-3.5976	1	0	2
-5.3903	1	0	2
-8.2097	1	0	2
-8.0607	1	0	2
7.4018	1	0	2
6.1058	1	0	2
7.409	1	0	2
7.7385	1	0	2
-5.5642	1	0	2
0.78515	1	0	2
7.976	1	0	2
2.2342	1	0	2
1.1172	1	0	2
3.6663	1	0	2
-1.4709	1	0	2
-6.1804	1	0	2
-4.5572	1	0	2
0.087076	1	0	2
6.1594	1	0	2
-5.3599	1	0	2
6.2641	1	0	2
7.6263	1	0	2
6.6794	1	0	2
7.5644	1	0	2
2.6457	1	0	2
0.59727	1	0	2
-0.82046	1	0	2
-6.6514	1	0	2
0.70742	1	0	2
-2.375	1	0	2
1.2762	1	0	2
1.0334	1	0	2
2.3577	1	0	3
-12.115	1	0	3
0.1628	1	0	3
7.285	1	0	3
2.2589	1	0	3
7.0728	1	0	3
1.1635	1	0	3
0.058843	1	0	3
7.0608	1	0	3
2.7691	1	0	3
6.3072	1	0	3
-0.25844	1	0	3
4.7075	1	0	3
5.5419	1	0	3
2.874	1	0	3
7.1136	1	0	3
2.4726	1	0	3
-1.6738	1	0	3
-1.8055	1	0	3
6.5871	1	0	3
-0.66937	1	0	3
-9.5372	1	0	3
2.8458	1	0	3
-4.1458	1	0	3
-2.5124	1	0	3
-0.38171	1	0	3
4.223	1	0	3
-5.7406	1	0	3
1.8976	1	0	3
2.1551	1	0	3
4.6748	1	0	3
5.0568	1	0	3
4.5241	1	0	3
1.7285	1	0	3
-0.23026	1	0	3
4.0627	1	0	3
-0.72809	1	0	3
4.8313	1	0	3
-6.4029	1	0	3
3.1021	1	0	3
-1.968	1	0	3
-0.35568	1	0	3
-8.3989	1	0	3
7.8822	1	0	3
-0.29104	1	0	3
1.385	1	0	3
-3.6502	1	0	3
-4.4805	1	0	3
0.89048	1	0	3
-7.6343	1	0	3
-6.7977	1	0	3
-9.4653	1	0	3
-6.5717	1	0	3
-3.4128	1	0	3
-9.7807	1	0	3
-2.416	1	0	3
-1.9859	1	0	3
-0.91587	1	0	3
3.0052	1	0	3
-3.0036	1	0	3
1.6497	1	0	3
-8.63	1	0	3
-0.72924	1	0	3
6.0754	1	0	3
3.8597	1	0	3
4.0114	1	0	3
0.18103	1	0	3
5.7715	1	0	3
-4.2198	1	0	3
-7.9225	1	0	3
1.2984	1	0	3
4.691	1	0	3
2.1794	1	0	3
6.9218	1	0	3
6.7244	1	0	3
6.6818	1	0	3
-2.6684	1	0	3
-5.9327	1	0	3
7.6663	1	0	3
-1.3301	1	0	3
5.533	1	0	3
6.8692	1	0	3
2.7163	1	0	3
6.0426	1	0	3
7.0305	1	0	3
7.4071	1	0	3
1.7995	1	0	3
1.3966	1	0	3
0.10738	1	0	3
1.8653	1	0	4
4.6578	1	0	4
5.0082	1	0	4
-6.2847	1	0	4
-2.8562	1	0	4
-10.346	1	0	4
-10.308	1	0	4
6.1905	1	0	4
4.8872	1	0	4
-0.67527	1	0	4
2.6626	1	0	4
0.013771	1	0	4
-6.8847	1	0	4
1.1419	1	0	4
0.21398	1	0	4
-1.1875	1	0	4
2.0007	1	0	4
1.647	1	0	4
1.2555	1	0	4
2.4477	1	0	4
1.9206	1	0	4
3.6418	1	0	4
2.6534	1	0	4
6.844	1	0	4
2.3561	1	0	4
-0.67843	1	0	4
-1.8134	1	0	4
-9.2533	1	0	4
-7.8845	1	0	4
4.6737	1	0	4
-2.2103	1	0	4
0.8406	1	0	4
2.1952	1	0	4
6.4359	1	0	4
5.4964	1	0	4
4.5471	1	0	4
6.6603	1	0	4
3.3306	1	0	4
1.979	1	0	4
6.8651	1	0	4
1.2815	1	0	4
4.9122	1	0	4
4.6179	1	0	4
5.6926	1	0	4
5.3287	1	0	4
0.5463	1	0	4
7.3313	1	0	4
2.4121	1	0	4
5.7996	1	0	4
7.1263	1	0	4
6.6071	1	0	4
6.6715	1	0	4
2.0034	1	0	4
-4.9251	1	0	4
5.3318	1	0	4
5.8108	1	0	4
5.9592	1	0	4
2.4979	1	0	4
7.465	1	0	4
2.2307	1	0	4
-5.1774	1	0	4
-0.74303	1	0	4
1.8561	1	0	4
-2.6448	1	0	4
2.1343	1	0	4
-0.1928	1	0	4
-8.071	1	0	4
0.16433	1	0	4
-0.42225	1	0	4
-2.4676	1	0	4
4.682	1	0	4
-7.4913	1	0	4
-0.97209	1	0	4
-2.2549	1	0	4
6.6823	1	0	4
3.8353	1	0	4
4.9952	1	0	4
-0.36707	1	0	4
0.41613	1	0	4
-8.3112	1	0	4
-18.097	1	0	4
-3.7076	1	0	4
6.5384	1	0	4
0.020182	1	0	4
-4.4108	1	0	4
-9.5864	1	0	4
-19.825	1	0	4
-16.715	1	0	4
-1.4208	1	0	4
2.7461	1	0	4
-15.68	1	0	4
-3.7042	1	0	4
-4.4575	1	0	4
-9.402	1	0	4
-4.5889	1	0	4
-0.80574	1	0	4
1.0828	1	0	4
-1.6089	1	0	4
1.2419	1	0	4
2.2501	1	0	4
-0.38786	1	0	4
2.512	1	0	4
3.6639	1	0	4
-2.7146	1	0	4
5.1404	1	0	4
2.7636	1	0	4
4.916	1	0	4
4.8455	1	0	4
4.4812	1	0	4
0.93592	1	0	4
3.4647	1	0	4
-3.5923	1	0	4
-10.615	1	0	4
-1.5446	1	0	4
4.0876	1	0	4
1.5631	1	0	4
3.5279	1	0	4
-4.0453	1	0	4
1.789	1	0	4
1.8606	1	0	4
5.8003	1	0	4
1.2457	1	0	4
-4.6439	1	0	4
-13.831	1	0	4
0.17501	1	0	4
2.1611	1	0	4
1.5265	1	0	4
6.0269	1	0	4
5.2343	1	0	4
4.7844	1	0	4
4.3657	1	0	4
4.9357	1	0	4
-1.452	1	0	4
5.7114	1	0	4
2.8445	1	0	4
-3.8028	1	0	4
0.51637	1	0	4
6.6952	1	0	4
5.8437	1	0	4
0.786	1	0	4
0.25319	1	0	4
1.5978	1	0	4
-2.367	1	0	4
-6.4395	1	0	4
5.4656	1	0	4
4.5805	1	0	4
-3.7461	1	0	4
-3.9619	1	0	4
3.2251	1	0	4
-3.2912	1	0	4
3.4141	1	0	4
-3.1321	1	0	4
-2.2198	1	0	4
-9.8697	1	0	4
-2.093	1	0	4
4.0834	1	0	4
-1.2882	1	0	4
2.6254	1	0	4
7.3373	1	0	4
5.1092	1	0	4
0.88296	1	0	4
3.1845	1	0	4
-2.6206	1	0	4
-2.4351	1	0	4
-0.25172	1	0	4
1.1489	1	0	4
2.7158	1	0	4
-8.984	1	0	4
-5.5589	1	0	4
5.4405	1	0	4
-3.1284	1	0	4
-2.5124	1	0	4
-12.319	1	0	4
-33.411	1	0	4
-0.79904	1	0	4
-6.6399	1	0	4
-1.2632	1	0	4
-8.6713	1	0	4
3.4975	1	0	4
5.0627	1	0	5
5.9234	1	0	5
7.7977	1	0	5
6.6072	1	0	5
4.2809	1	0	5
-0.015877	1	0	5
-2.1345	1	0	5
1.1813	1	0	5
4.2103	1	0	5
-4.5506	1	0	5
3.4516	1	0	5
3.8591	1	0	5
0.44125	1	0	5
-0.93613	1	0	5
-3.6369	1	0	5
6.9914	1	0	5
6.9928	1	0	5
6.4769	1	0	5
7.7321	1	0	5
7.9122	1	0	5
7.8455	1	0	5
6.4338	1	0	5
3.9226	1	0	5
6.9441	1	0	5
5.7639	1	0	5
7.5986	1	0	5
6.5442	1	0	5
6.7484	1	0	5
6.9202	1	0	5
5.728	1	0	5
7.6314	1	0	5
7.6213	1	0	5
7.913	1	0	5
4.6388	1	0	5
6.3836	1	0	5
7.7937	1	0	5
7.8973	1	0	5
7.722	1	0	5
7.9576	1	0	5
7.8592	1	0	5
7.4477	1	0	5
7.1079	1	0	5
6.7283	1	0	5
7.1803	1	0	5
7.1302	1	0	5
7.7112	1	0	5
7.8435	1	0	5
7.9355	1	0	5
7.3741	1	0	5
7.8086	1	0	5
7.651	1	0	5
1.717	1	0	5
6.8719	1	0	5
2.7194	1	0	5
5.9326	1	0	5
7.5368	1	0	5
7.2516	1	0	5
7.9044	1	0	5
7.7477	1	0	5
7.054	1	0	5
7.5327	1	0	5
5.3981	1	0	5
4.0245	1	0	5
-2.3511	1	0	5
0.50183	1	0	5
3.3564	1	0	5
4.487	1	0	5
6.5935	1	0	5
7.9226	1	0	5
5.5672	1	0	5
7.4677	1	0	5
1.4214	1	0	5
7.582	1	0	5
7.7889	1	0	5
7.7735	1	0	5
7.8317	1	0	5
7.8312	1	0	5
6.0686	1	0	5
7.5318	1	0	5
6.2585	1	0	5
7.3294	1	0	5
7.8783	1	0	5
7.5982	1	0	5
7.8363	1	0	5
6.2687	1	0	5
7.5845	1	0	5
7.8967	1	0	5
6.4602	1	0	5
-2.0545	1	0	5
6.899	1	0	5
5.6217	1	0	5
6.7153	1	0	5
7.87	1	0	5
7.0415	1	0	5
7.6122	1	0	5
6.5071	1	0	5
4.6746	1	0	5
6.9758	1	0	5
7.3974	1	0	5
2.7403	1	0	5
7.7514	1	0	5
7.5108	1	0	5
7.911	1	0	5
7.5429	1	0	5
3.9572	1	0	5
1.1805	1	0	5
7.7465	1	0	5
7.4432	1	0	5
2.1928	1	0	5
2.6873	1	0	5
4.3318	1	0	5
1.0813	1	0	5
-1.2147	1	0	5
1.5516	1	0	5
2.4807	1	0	5
3.0157	1	0	5
-0.2351	1	0	5
-2.6647	1	0	5
6.5983	1	0	5
3.658	1	0	5
5.4615	1	0	5
7.6196	1	0	5
7.1518	1	0	5
3.3011	1	0	5
0.73536	1	0	5
3.6446	1	0	5
7.2806	1	0	5
2.6706	1	0	5
6.6103	1	0	5
7.8174	1	0	5
7.4794	1	0	5
7.5363	1	0	5
6.759	1	0	5
7.9532	1	0	5
5.7901	1	0	5
-0.38536	1	0	5
6.7917	1	0	5
7.289	1	0	5
4.9717	1	0	5
2.9387	1	0	5
5.7808	1	0	5
6.6723	1	0	5
7.3724	1	0	5
7.7703	1	0	5
7.8822	1	0	5
6.9158	1	0	5
7.8559	1	0	5
7.8725	1	0	5
7.6307	1	0	5
6.9984	1	0	5
3.3229	1	0	5
-0.19852	1	0	5
6.7537	1	0	5
7.7816	1	0	5
7.3498	1	0	5
7.4252	1	0	5
7.8516	1	0	5
7.9785	1	0	5
6.5794	1	0	5
7.6992	1	0	5
0.097594	1	0	5
0.74202	1	0	5
5.1796	1	0	5
-12.133	1	0	5
-3.4586	1	0	5
6.9403	1	0	5
4.6647	1	0	5
7.9809	1	0	5
6.604	1	0	5
7.2573	1	0	5
4.3472	1	0	5
6.7861	1	0	5
4.7338	1	0	5
4.4515	1	0	5
-4.6237	1	0	5
3.1485	1	0	5
-5.1767	1	0	5
-3.1609	1	0	5
-6.8876	1	0	5
-1.2103	1	0	5
3.6635	1	0	5
-1.2482	1	0	5
-6.0696	1	0	5
-0.27581	1	0	6
4.164	1	0	6
-0.33088	1	0	6
-1.6185	1	0	6
-30.834	1	0	6
-1.7988	1	0	6
-17.246	1	0	6
-13.103	1	0	6
-14.668	1	0	6
-6.7227	1	0	6
4.0602	1	0	6
2.0961	1	0	6
4.1717	1	0	6
3.591	1	0	6
-11.016	1	0	6
-1.3177	1	0	6
-1.1263	1	0	6
2.106	1	0	6
-2.3038	1	0	6
-3.6197	1	0	6
-8.7163	1	0	6
-6.2691	1	0	6
-4.2168	1	0	6
-1.5449	1	0	6
0.77853	1	0	6
3.0429	1	0	6
1.0426	1	0	6
1.7853	1	0	6
5.2414	1	0	6
-12.775	1	0	6
-0.91905	1	0	6
3.024	1	0	6
4.8151	1	0	6
0.33097	1	0	6
-2.2501	1	0	6
5.1149	1	0	6
-5.1497	1	0	6
0.82565	1	0	6
3.8128	1	0	6
0.69007	1	0	6
-2.3136	1	0	6
-11.857	1	0	6
-7.0506	1	0	6
-17.156	1	0	6
-14.838	1	0	6
1.0225	1	0	6
-0.28805	1	0	6
5.1844	1	0	6
5.2387	1	0	6
3.5165	1	0	6
-7.7557	1	0	6
5.1354	1	0	6
-0.27741	1	0	6
-6.9188	1	0	6
-4.9501	1	0	6
-0.27982	1	0	6
-7.6362	1	0	6
-4.4064	1	0	6
-12.671	1	0	6
-3.3865	1	0	6
-1.7216	1	0	6
-3.4832	1	0	6
-7.714	1	0	6
-4.2348	1	0	6
-5.1337	1	0	6
0.60634	1	0	6
3.195	1	0	6
6.4116	1	0	6
6.1049	1	0	6
5.6781	1	0	6
6.8611	1	0	6
5.2381	1	0	6
4.238	1	0	6
3.0923	1	0	6
2.3778	1	0	6
3.0868	1	0	6
0.927	1	0	6
2.5941	1	0	6
2.9921	1	0	6
-5.4724	1	0	6
6.5247	1	0	6
6.1879	1	0	6
3.4287	1	0	6
3.0641	1	0	6
6.202	1	0	6
5.2467	1	0	6
5.7826	1	0	6
5.2623	1	0	6
5.3245	1	0	6
-1.3586	1	0	6
3.3946	1	0	6
6.7037	1	0	6
4.9113	1	0	6
7.0283	1	0	6
3.3047	1	0	6
7.2224	1	0	6
5.0764	1	0	6
5.8276	1	0	6
0.43935	1	0	6
4.1441	1	0	6
4.9878	1	0	6
4.5529	1	0	6
5.2618	1	0	6
4.1636	1	0	6
5.2506	1	0	6
4.8094	1	0	6
4.9538	1	0	6
6.3472	1	0	6
6.4349	1	0	6
-2.5281	1	0	6
3.0642	1	0	6
2.6539	1	0	6
4.5936	1	0	6
4.5852	1	0	6
6.6427	1	0	6
7.7658	1	0	6
6.2918	1	0	6
6.9538	1	0	6
6.3797	1	0	6
6.4358	1	0	6
5.08	1	0	6
2.5618	1	0	6
6.4294	1	0	6
0.28628	1	0	6
0.23838	1	0	6
6.9013	1	0	6
4.982	1	0	6
4.4111	1	0	6
0.94276	1	0	6
-1.0788	1	0	6
2.7085	1	0	6
-0.20176	1	0	6
-5.4701	1	0	6
0.4859	1	0	6
5.812	1	0	6
5.0689	1	0	6
7.1152	1	0	6
6.7357	1	0	6
7.4223	1	0	6
6.2028	1	0	6
6.9474	1	0	6
4.9809	1	0	6
5.4477	1	0	6
5.2265	1	0	6
3.0822	1	0	6
5.2886	1	0	6
6.7433	1	0	6
5.0131	1	0	6
3.5983	1	0	6
6.1596	1	0	6
5.5474	1	0	6
5.1971	1	0	6
4.085	1	0	6
6.1135	1	0	6
2.198	1	0	6
2.336	1	0	6
3.4865	1	0	6
-0.90062	1	0	6
3.5932	1	0	6
2.3182	1	0	6
6.1129	1	0	6
6.9201	1	0	6
4.2015	1	0	6
-2.6069	1	0	6
1.0678	1	0	6
6.9058	1	0	6
7.3327	1	0	6
7.2052	1	0	6
1.1599	1	0	6
0.82668	1	0	6
-0.58818	1	0	6
-17.306	1	0	6
-15.091	1	0	6
-5.9536	1	0	6
5.4193	1	0	6
3.9252	1	0	6
0.24933	1	0	6
-1.1028	1	0	6
3.1236	1	0	6
-18.32	1	0	6
-25.172	1	0	6
-3.1114	1	0	6
5.7642	1	0	6
-8.1577	1	0	6
3.0131	1	0	6
5.1995	1	0	6
5.3346	1	0	6
3.107	1	0	6
-3.5847	1	0	6
-5.289	1	0	6
-6.1771	1	0	6
-6.7367	1	0	6
-7.4434	1	0	6
-8.2215	1	0	6
5.8302	1	0	6
-1.5785	1	0	6
1.0031	1	0	6
4.917	1	0	6
1.5031	1	0	6
-1.5427	1	0	6
1.2154	1	0	6
3.0785	1	0	6
1.4147	1	0	6
3.6608	1	0	6
4.382	1	0	6
3.3107	1	0	6
1.5412	1	0	6
-4.2438	1	0	6
-11.512	1	0	6
-4.8999	1	0	6
-3.8962	1	0	6
-8.0386	1	0	6
1.335	1	0	6
1.2432	1	0	6
2.0467	1	0	6
-8.492	1	0	6
5.3953	1	0	6
-3.6275	1	0	6
0.26815	1	0	6
-1.501	1	0	6
-4.4517	1	0	6
-2.6822	1	0	6
-2.5829	1	0	6
-5.905	1	0	6
3.8438	1	0	6
1.4021	1	0	6
5.7244	1	0	6
1.8581	1	0	6
2.6981	1	0	6
-0.48262	1	0	6
-0.72047	1	0	6
5.5416	1	0	6
2.7097	1	0	6
6.7234	1	0	6
1.7151	1	0	6
4.9661	1	0	6
2.5129	1	0	6
-5.864	1	0	6
-1.2544	1	0	6
6.1972	1	0	6
7.2021	1	0	6
6.9704	1	0	6
7.6772	1	0	6
4.7851	1	0	6
5.803	1	0	6
6.4867	1	0	6
6.1747	1	0	6
6.9211	1	0	6
7.6598	1	0	6
4.21	1	0	6
-0.37854	1	0	6
4.9902	1	0	6
4.9192	1	0	6
6.1706	1	0	6
6.3635	1	0	6
5.5778	1	0	6
2.7277	1	0	6
7.3276	1	0	6
6.5807	1	0	6
2.4199	1	0	6
7.2168	1	0	6
6.9405	1	0	6
6.194	1	0	6
7.3476	1	0	6
4.9176	1	0	6
4.6731	1	0	6
4.3649	1	0	6
7.2423	1	0	6
5.9203	1	0	6
6.6212	1	0	6
5.5483	1	0	6
5.1192	1	0	6
6.864	1	0	6
6.5638	1	0	6
7.5979	1	0	6
5.9275	1	0	6
2.054	1	0	6
7.2145	1	0	6
6.5494	1	0	6
7.2244	1	0	6
4.531	1	0	6
6.8022	1	0	6
4.7794	1	0	6
5.85	1	0	6
3.8283	1	0	6
4.9935	1	0	6
6.2778	1	0	6
5.8636	1	0	6
5.272	1	0	6
2.6904	1	0	7
-1.2053	1	0	7
2.4843	1	0	7
0.388	1	0	7
4.2491	1	0	7
2.0241	1	0	7
2.3413	1	0	7
0.99737	1	0	7
2.5437	1	0	7
3.3437	1	0	7
-2.4327	1	0	7
1.7837	1	0	7
-11.637	1	0	7
-7.8994	1	0	7
3.9762	1	0	7
-3.0068	1	0	7
3.6441	1	0	7
1.0557	1	0	7
-3.0435	1	0	7
3.8153	1	0	7
3.4181	1	0	7
2.7886	1	0	7
2.5024	1	0	7
-16.794	1	0	7
-6.2093	1	0	7
1.5324	1	0	7
-5.1273	1	0	7
-10.849	1	0	7
5.4734	1	0	7
6.0023	1	0	7
7.3368	1	0	7
5.8109	1	0	7
-0.30871	1	0	7
-1.4339	1	0	7
7.4929	1	0	7
5.5212	1	0	7
1.3961	1	0	7
5.4902	1	0	7
6.7987	1	0	7
-9.8159	1	0	7
-4.7323	1	0	7
-7.9149	1	0	7
-5.2062	1	0	7
-0.68472	1	0	7
-9.0115	1	0	7
0.07873	1	0	7
-12.334	1	0	7
3.4635	1	0	7
1.3552	1	0	7
0.44485	1	0	7
-0.74546	1	0	7
-8.9597	1	0	7
-3.3916	1	0	7
-15.717	1	0	7
-11.083	1	0	7
0.72422	1	0	7
0.90451	1	0	7
-10.399	1	0	7
-2.0367	1	0	7
3.3911	1	0	7
4.8715	1	0	7
1.1403	1	0	7
2.6949	1	0	7
-4.4234	1	0	7
-8.0576	1	0	7
-3.917	1	0	7
-11.105	1	0	7
-11.651	1	0	7
-9.6733	1	0	7
-4.591	1	0	7
-19.101	1	0	7
-16.219	1	0	7
6.2925	1	0	7
0.40035	1	0	7
4.704	1	0	7
-8.1915	1	0	7
-2.0626	1	0	7
6.1814	1	0	7
-5.6509	1	0	7
-4.0212	1	0	7
1.6307	1	0	7
-3.1153	1	0	7
4.4013	1	0	7
5.0374	1	0	7
-4.2151	1	0	7
-3.2143	1	0	7
-1.1477	1	0	7
-0.97687	1	0	7
6.0255	1	0	7
5.8345	1	0	7
5.6938	1	0	7
4.6699	1	0	7
3.2934	1	0	7
-3.8667	1	0	7
-4.9904	1	0	7
-5.0803	1	0	7
1.7294	1	0	7
-19.078	1	0	7
6.8673	1	0	7
-0.6186	1	0	7
-1.0918	1	0	7
-9.3069	1	0	7
-5.7798	1	0	7
4.9476	1	0	7
6.5547	1	0	7
6.723	1	0	7
-11.39	1	0	7
-10.147	1	0	7
3.0941	1	0	7
-3.845	1	0	7
5.4591	1	0	7
5.081	1	0	7
0.96179	1	0	7
1.3074	1	0	7
-11.27	1	0	8
-4.4502	1	0	8
-3.0581	1	0	8
-10.835	1	0	8
-3.8006	1	0	8
2.1567	1	0	8
6.3123	1	0	8
2.9786	1	0	8
7.6617	1	0	8
7.7728	1	0	8
6.3163	1	0	8
4.994	1	0	8
4.3637	1	0	8
6.1411	1	0	8
7.6926	1	0	8
5.4049	1	0	8
6.6428	1	0	8
6.948	1	0	8
6.2467	1	0	8
7.3115	1	0	8
6.6268	1	0	8
1.5618	1	0	8
3.5906	1	0	8
7.1788	1	0	8
7.9595	1	0	8
6.7847	1	0	8
7.093	1	0	8
3.7879	1	0	8
7.0505	1	0	8
4.7038	1	0	8
7.9836	1	0	8
5.3683	1	0	8
7.2332	1	0	8
7.5586	1	0	8
7.7388	1	0	8
4.8312	1	0	8
6.4022	1	0	8
3.4575	1	0	8
7.2927	1	0	8
7.9156	1	0	8
7.2349	1	0	8
3.5211	1	0	8
7.0938	1	0	8
3.3945	1	0	8
5.3219	1	0	8
7.6953	1	0	8
7.5562	1	0	8
5.3447	1	0	8
7.7964	1	0	8
5.7732	1	0	8
7.6792	1	0	8
7.5587	1	0	8
5.6989	1	0	8
7.3573	1	0	8
7.4889	1	0	8
3.5203	1	0	8
2.6292	1	0	8
4.4793	1	0	8
4.2749	1	0	8
4.3588	1	0	8
7.4693	1	0	8
8.0204	1	0	8
7.9379	1	0	8
7.7125	1	0	8
6.8668	1	0	8
-2.0777	1	0	8
0.42284	1	0	8
7.1747	1	0	8
2.6192	1	0	8
5.8988	1	0	8
6.8748	1	0	8
3.3265	1	0	8
1.9839	1	0	8
3.858	1	0	8
7.6825	1	0	8
7.5263	1	0	8
7.1954	1	0	8
7.8544	1	0	8
5.7606	1	0	8
7.2704	1	0	8
5.8602	1	0	8
5.4031	1	0	8
1.9414	1	0	8
2.8676	1	0	8
6.3489	1	0	8
8.006	1	0	8
7.5308	1	0	8
4.1677	1	0	8
2.0311	1	0	8
5.9876	1	0	8
4.0747	1	0	8
7.4784	1	0	8
7.3836	1	0	8
3.6409	1	0	8
7.337	1	0	8
7.2863	1	0	8
5.3493	1	0	8
7.9547	1	0	8
7.8775	1	0	8
-5.4957	1	0	8
6.4509	1	0	8
1.9458	1	0	8
2.6997	1	0	8
7.7417	1	0	8
7.7001	1	0	8
5.0152	1	0	8
7.9575	1	0	8
5.3174	1	0	8
7.264	1	0	8
5.034	1	0	8
-3.8595	1	0	8
-3.1324	1	0	8
3.0826	1	0	8
1.5459	1	0	8
5.4772	1	0	8
7.3356	1	0	8
4.6528	1	0	8
7.8593	1	0	8
7.6188	1	0	8
7.9117	1	0	8
7.5559	1	0	8
7.0269	1	0	8
7.78	1	0	8
1.0209	1	0	8
5.5657	1	0	8
7.8989	1	0	8
7.8818	1	0	8
7.676	1	0	8
7.6999	1	0	8
3.9989	1	0	8
4.6826	1	0	8
6.4225	1	0	8
5.2706	1	0	8
5.7555	1	0	8
7.4083	1	0	8
7.8999	1	0	8
7.035	1	0	8
7.6557	1	0	8
6.9076	1	0	8
3.5619	1	0	8
2.2318	1	0	8
4.8729	1	0	8
7.8416	1	0	8
2.8914	1	0	8
-2.1009	1	0	8
5.141	1	0	8
5.4313	1	0	8
7.6808	1	0	8
6.9622	1	0	8
4.9299	1	0	8
7.383	1	0	8
7.5474	1	0	8
4.3954	1	0	8
7.8722	1	0	8
6.5324	1	0	8
4.9622	1	0	8
5.4251	1	0	8
7.5674	1	0	8
6.1112	1	0	8
4.5947	1	0	8
5.6816	1	0	8
4.8787	1	0	8
4.4353	1	0	8
6.1972	1	0	8
4.6904	1	0	8
4.0881	1	0	8
5.0269	1	0	8
2.766	1	0	8
5.1492	1	0	8
4.6753	1	0	8
7.5178	1	0	8
5.8829	1	0	8
7.808	1	0	8
7.6707	1	0	8
7.8298	1	0	8
5.5701	1	0	8
7.9112	1	0	8
7.9851	1	0	8
7.8669	1	0	8
7.1784	1	0	8
7.9341	1	0	8
3.7767	1	0	8
7.7543	1	0	8
6.8385	1	0	8
7.8953	1	0	8
7.8925	1	0	8
7.2755	1	0	8
7.6704	1	0	8
7.1111	1	0	8
5.0103	1	0	8
4.3031	1	0	8
5.6482	1	0	8
4.1811	1	0	8
4.999	1	0	8
-1.7059	1	0	8
7.2398	1	0	8
4.7216	1	0	8
3.0931	1	0	8
7.1329	1	0	8
7.7382	1	0	8
3.9538	1	0	8
6.8915	1	0	8
7.7825	1	0	8
7.7753	1	0	8
5.4722	1	0	8
4.6019	1	0	8
-1.9784	1	0	8
3.2135	1	0	8
4.2992	1	0	8
7.7406	1	0	8
7.6233	1	0	8
3.8299	1	0	8
8.0033	1	0	8
6.4373	1	0	8
4.7958	1	0	8
2.348	1	0	8
6.5308	1	0	8
2.5863	1	0	8
7.7229	1	0	8
6.8757	1	0	8
6.8587	1	0	8
6.5513	1	0	8
6.9386	1	0	8
7.3974	1	0	8
3.9888	1	0	8
7.57	1	0	8
7.4077	1	0	8
6.5782	1	0	8
3.3625	1	0	8
7.7174	1	0	8
5.6509	1	0	8
6.8344	1	0	8
7.0444	1	0	8
7.4663	1	0	8
7.2876	1	0	8
3.447	1	0	8
6.9841	1	0	8
7.6282	1	0	8
6.2649	1	0	8
7.2853	1	0	8
2.4163	1	0	8
5.7319	1	0	8
3.7963	1	0	8
6.805	1	0	8
6.7099	1	0	8
6.7	1	0	8
3.8172	1	0	8
4.6053	1	0	8
0.97304	1	0	8
1.8701	1	0	8
7.4129	1	0	8
6.7995	1	0	8
5.2002	1	0	8
7.5811	1	0	8
4.0951	1	0	8
5.1316	1	0	8
6.7149	1	0	8
2.7686	1	0	8
4.6108	1	0	8
6.6086	1	0	8
7.2735	1	0	8
7.1008	1	0	8
3.2258	1	0	8
-3.5095	1	0	8
-1.7887	1	0	8
7.7293	1	0	8
-6.0389	1	0	8
4.6729	1	0	8
7.7586	1	0	8
5.8298	1	0	8
-0.11442	1	0	8
3.2677	1	0	8
4.1634	1	0	8
2.4328	1	0	8
3.6376	1	0	8
3.8171	1	0	8
4.6869	1	0	8
7.6688	1	0	8
-2.5059	1	0	8
7.581	1	0	8
-1.773	1	0	8
-1.9155	1	0	8
6.2331	1	0	8
7.9565	1	0	8
7.4246	1	0	8
4.5414	1	0	8
4.2201	1	0	8
7.5453	1	0	8
7.7336	1	0	8
6.5585	1	0	8
7.0351	1	0	8
7.7108	1	0	8
6.8027	1	0	8
7.4148	1	0	8
4.6635	1	0	8
7.6702	1	0	8
7.768	1	0	8
4.5137	1	0	8
7.5139	1	0	8
4.5658	1	0	8
5.0583	1	0	8
7.7478	1	0	8
7.6288	1	0	8
4.9786	1	0	8
5.8056	1	0	8
7.3771	1	0	8
7.7594	1	0	8
7.7534	1	0	8
6.7161	1	0	8
7.4596	1	0	8
5.6881	1	0	8
6.4327	1	0	8
6.6991	1	0	8
7.4607	1	0	8
7.3144	1	0	8
7.5231	1	0	8
7.1883	1	0	8
7.5687	1	0	8
7.7163	1	0	8
7.3761	1	0	8
3.7973	1	0	8
6.9879	1	0	8
5.7172	1	0	8
7.4207	1	0	8
7.5687	1	0	8
6.4599	1	0	8
7.4338	1	0	8
7.3256	1	0	8
2.7586	1	0	8
6.9474	1	0	8
7.3165	1	0	8
6.1624	1	0	8
1.1787	1	0	8
2.7081	1	0	8
3.1348	1	0	8
-2.7072	1	0	8
-2.9267	1	0	8
-7.2726	1	0	8
0.32605	1	0	8
4.658	1	0	8
4.5129	1	0	8
7.657	1	0	8
5.7547	1	0	8
7.8807	1	0	8
6.2178	1	0	8
4.4188	1	0	8
7.2959	1	0	8
6.8304	1	0	8
6.6417	1	0	8
6.1966	1	0	8
7.3427	1	0	8
6.1036	1	0	8
2.7009	1	0	8
5.9653	1	0	8
5.4364	1	0	8
7.0827	1	0	8
3.8701	1	0	8
3.4797	1	0	8
2.2223	1	0	8
6.3269	1	0	8
7.7056	1	0	8
6.7202	1	0	8
6.2728	1	0	8
7.1499	1	0	8
7.3903	1	0	8
6.5454	1	0	8
6.7443	1	0	8
-1.3404	1	0	8
6.126	1	0	8
7.3173	1	0	8
7.5451	1	0	8
7.3402	1	0	8
7.248	1	0	8
7.1841	1	0	8
7.0751	1	0	8
4.0347	1	0	8
1.3619	1	0	8
2.916	1	0	8
7.0207	1	0	8
7.7224	1	0	8
4.6359	1	0	8
7.2685	1	0	8
6.6066	1	0	8
7.2689	1	0	8
7.048	1	0	8
5.3591	1	0	8
6.7601	1	0	8
4.7384	1	0	8
2.6666	1	0	8
2.9466	1	0	8
7.4807	1	0	8
5.1129	1	0	8
3.8983	1	0	8
6.0949	1	0	8
5.3382	1	0	8
3.6023	1	0	8
-1.832	1	0	8
1.8484	1	0	8
4.7818	1	0	8
7.4824	1	0	8
6.7658	1	0	8
-3.4884	1	0	8
-2.3704	1	0	8
7.6396	1	0	8
6.6836	1	0	8
4.7298	1	0	8
7.4467	1	0	8
3.0916	1	0	8
4.6049	1	0	8
0.80333	1	0	8
-1.4313	1	0	8
2.6847	1	0	8
0.29402	1	0	8
2.8489	1	0	8
4.9673	1	0	8
-1.3193	1	0	8
6.0661	1	0	8
3.1438	1	0	8
1.1941	1	0	8
-21.881	1	1	1
-7.5099	1	1	1
-18.493	1	1	1
-13.72	1	1	1
-3.2673	1	1	1
-11.988	1	1	1
-12.834	1	1	1
-12.476	1	1	1
-20.953	1	1	1
-11.616	1	1	1
-16.343	1	1	1
-10.734	1	1	1
-11.913	1	1	1
-12.618	1	1	1
-23.698	1	1	1
-18.427	1	1	1
-13.222	1	1	1
-13.666	1	1	1
-15.643	1	1	1
-13.686	1	1	1
-12.731	1	1	1
-14.455	1	1	1
-9.4479	1	1	1
-13.225	1	1	1
-17.336	1	1	1
-15.864	1	1	1
-18.345	1	1	1
-16.632	1	1	1
-17.181	1	1	1
-16.168	1	1	1
-14.244	1	1	1
-19.931	1	1	1
-22.901	1	1	1
-25.909	1	1	1
-24.532	1	1	1
-14.83	1	1	1
-30.141	1	1	1
-23.452	1	1	1
-21.701	1	1	1
-25.902	1	1	1
-19.419	1	1	1
-16.062	1	1	1
-23.37	1	1	1
-21.058	1	1	1
-22.975	1	1	1
-21.835	1	1	1
-25.429	1	1	1
-16.771	1	1	1
-18.556	1	1	1
-16.673	1	1	1
-18.639	1	1	1
-13.685	1	1	1
-18.422	1	1	1
-16.139	1	1	1
-19.76	1	1	1
-20.729	1	1	1
-22.445	1	1	1
-14.135	1	1	1
-18.654	1	1	1
-19.74	1	1	1
-21.961	1	1	1
-19.469	1	1	1
-19.77	1	1	1
-27.295	1	1	1
-24.633	1	1	1
-24.479	1	1	1
-15.193	1	1	1
-18.74	1	1	1
-17.51	1	1	1
-16.292	1	1	1
-16.443	1	1	1
-17.104	1	1	1
-18.97	1	1	1
-25.795	1	1	1
-22.483	1	1	1
-15.499	1	1	1
-18.897	1	1	1
-18.639	1	1	1
-14.097	1	1	1
-19.272	1	1	1
-17.688	1	1	1
-18.493	1	1	1
-20.165	1	1	1
-15.341	1	1	1
-16.312	1	1	1
-9.0885	1	1	1
-16.041	1	1	1
-18.112	1	1	1
-14.697	1	1	1
-17.176	1	1	1
-16.235	1	1	1
-13.494	1	1	1
-15.798	1	1	1
-11.737	1	1	1
-17.953	1	1	1
-9.5576	1	1	1
-13.666	1	1	1
-20.031	1	1	1
-17.01	1	1	1
-21.044	1	1	1
-27.448	1	1	1
-25.388	1	1	1
-18.733	1	1	1
-16.562	1	1	1
-17.728	1	1	1
-20.714	1	1	1
-20.422	1	1	1
-17.455	1	1	1
-27.41	1	1	1
-26.879	1	1	1
-24.526	1	1	1
-21.443	1	1	1
-24.367	1	1	1
-22.341	1	1	1
-22.767	1	1	1
-27.311	1	1	1
-24.732	1	1	1
-18.872	1	1	1
-34.076	1	1	1
-27.178	1	1	1
-20.079	1	1	1
-21.641	1	1	1
-16.862	1	1	1
-23.186	1	1	1
-9.3263	1	1	1
-26.254	1	1	1
-19.49	1	1	1
-27.643	1	1	1
-10.814	1	1	1
-16.451	1	1	1
-14.562	1	1	1
-10.48	1	1	1
-12.428	1	1	1
-8.1529	1	1	1
-27.912	1	1	1
-18.539	1	1	1
-15.259	1	1	1
-18.703	1	1	1
-14.225	1	1	1
-18.586	1	1	1
-16.871	1	1	1
-24.563	1	1	1
-19.721	1	1	1
-17.054	1	1	1
-17.537	1	1	1
-16.482	1	1	1
-11.801	1	1	1
-19.306	1	1	1
-18.535	1	1	1
-17.593	1	1	1
-20.384	1	1	1
-7.1772	1	1	1
-21.924	1	1	1
-24.96	1	1	1
-25.84	1	1	1
-23.789	1	1	1
-23.81	1	1	1
-25.187	1	1	1
-18.906	1	1	1
-22.563	1	1	1
-20.821	1	1	1
-24.754	1	1	1
-22.368	1	1	1
-16.951	1	1	1
-15.502	1	1	1
-14.676	1	1	1
-18.892	1	1	1
-17.853	1	1	1
-18.835	1	1	1
-22.609	1	1	1
-22.123	1	1	1
-12.92	1	1	1
-5.1889	1	1	1
-17.436	1	1	1
-7.6431	1	1	1
-13.104	1	1	1
-6.7686	1	1	1
-11.205	1	1	1
-11.447	1	1	1
-9.9013	1	1	1
-15.345	1	1	1
-14.986	1	1	1
-13.894	1	1	1
-11.977	1	1	1
-21.006	1	1	1
-23.483	1	1	1
-12.566	1	1	1
-16.951	1	1	1
-15.554	1	1	1
-20.083	1	1	1
-17.915	1	1	1
-15.375	1	1	1
-17.913	1	1	1
-5.5431	1	1	1
-6.1304	1	1	1
-13.683	1	1	1
-11.605	1	1	1
-16.387	1	1	1
-17.318	1	1	1
-25.532	1	1	1
-19.95	1	1	1
-15.802	1	1	1
-15.727	1	1	1
-14.245	1	1	1
-18.578	1	1	1
-8.0383	1	1	1
-11.721	1	1	1
-14.196	1	1	1
-13.784	1	1	1
-11.792	1	1	1
-16.794	1	1	1
-13.244	1	1	1
-15.699	1	1	1
-24.639	1	1	1
-16.359	1	1	1
-18.322	1	1	1
-20.956	1	1	1
-17.883	1	1	1
-18.105	1	1	1
-17.574	1	1	1
-18.128	1	1	1
-18.18	1	1	1
-13.389	1	1	1
-16.598	1	1	1
-12.624	1	1	1
-6.6411	1	1	1
-22.418	1	1	1
-18.668	1	1	1
-15.372	1	1	1
-10.005	1	1	1
-12.536	1	1	1
-10.553	1	1	1
-15.391	1	1	1
-12.651	1	1	1
-15.874	1	1	1
-15.275	1	1	1
-13.085	1	1	1
-26.041	1	1	1
-19.477	1	1	1
-2.9159	1	1	2
-8.4435	1	1	2
2.5341	1	1	2
2.6944	1	1	2
1.8352	1	1	2
-0.67091	1	1	2
-5.9291	1	1	2
0.81982	1	1	2
0.49929	1	1	2
-6.1738	1	1	2
-5.666	1	1	2
1.4225	1	1	2
2.0974	1	1	2
-0.67949	1	1	2
-7.3865	1	1	2
-7.5564	1	1	2
-3.0983	1	1	2
-2.295	1	1	2
-0.93431	1	1	2
1.7729	1	1	2
-4.2314	1	1	2
0.079617	1	1	2
-6.28	1	1	2
-5.2305	1	1	2
-4.7962	1	1	2
0.5438	1	1	2
-5.956	1	1	2
-6.9877	1	1	2
-9.6649	1	1	2
-5.1035	1	1	2
-3.5148	1	1	2
-4.724	1	1	2
2.8566	1	1	2
-3.7017	1	1	2
-4.2247	1	1	2
-12.739	1	1	2
-9.4994	1	1	2
-3.8592	1	1	2
-13.403	1	1	2
-0.20601	1	1	2
-1.9504	1	1	2
-8.3921	1	1	2
-5.6451	1	1	2
2.696	1	1	2
-3.6135	1	1	2
-4.4093	1	1	2
-2.1729	1	1	2
-4.517	1	1	2
-6.8907	1	1	2
-5.5016	1	1	2
-1.2416	1	1	2
-7.8204	1	1	2
0.52651	1	1	2
-1.6253	1	1	2
0.017549	1	1	2
-7.4747	1	1	2
-6.0859	1	1	2
-0.63548	1	1	2
1.7568	1	1	2
-4.252	1	1	2
-6.9152	1	1	2
-10.162	1	1	2
-2.7474	1	1	2
-7.6573	1	1	2
-2.8245	1	1	2
-6.8297	1	1	2
-4.2964	1	1	2
2.2533	1	1	2
2.7615	1	1	2
0.50448	1	1	2
-2.9319	1	1	2
0.66307	1	1	2
-13.087	1	1	2
-12.285	1	1	2
-2.354	1	1	2
5.4003	1	1	2
-15.029	1	1	2
-5.729	1	1	2
4.5019	1	1	2
-13.513	1	1	2
-2.9552	1	1	2
4.6015	1	1	2
-11.282	1	1	2
-11.852	1	1	2
-9.3073	1	1	2
-3.945	1	1	2
5.875	1	1	2
4.374	1	1	2
-3.8877	1	1	2
-0.075134	1	1	2
-10.251	1	1	2
-10.063	1	1	2
-2.4363	1	1	2
0.63952	1	1	2
6.1049	1	1	2
-5.0677	1	1	2
0.27321	1	1	2
-10.224	1	1	2
-9.958	1	1	2
1.8146	1	1	2
-16.183	1	1	2
-2.4949	1	1	2
-5.7934	1	1	2
2.7084	1	1	2
-12.47	1	1	2
-20.121	1	1	2
-10.657	1	1	2
-14.93	1	1	2
-10.521	1	1	2
-7.6587	1	1	2
-6.9323	1	1	2
-0.45728	1	1	2
-10.326	1	1	2
-16.924	1	1	2
-4.3827	1	1	2
-11.869	1	1	2
1.7374	1	1	2
-17.83	1	1	2
-4.8274	1	1	2
-16.128	1	1	2
-14.239	1	1	2
-3.0145	1	1	2
[truncated: 13,974 more rows]
