# Supplementary material for: Breakdown of local information processing may underlie isoflurane anesthesia effects
Source: PLoS Comput Biol. 2017 Jun 1;13(6):e1005511. doi: 10.1371/journal.pcbi.1005511 (PMC5453425; doi:10.1371/journal.pcbi.1005511)
Supplement: S1 Dataset — (ZIP) [file pcbi.1005511.s001.zip › ferret_1_h_ksg_raw_median.csv]

raw data	data z_scored	factor direction	factor anesthesia
-0.096817	0.81349	1	1
2.0146	1.1166	1	1
1.3966	1.0279	1	1
1.2457	1.0062	1	1
6.7153	1.7915	1	1
3.3107	1.3027	1	1
0.39417	0.88398	1	1
6.2649	1.7268	1	1
-17.51	-1.6865	2	1
-4.2742	0.21374	2	1
-11.8	-0.86672	2	1
-7.6697	-0.27374	2	1
-10.272	-0.64729	2	1
-3.3036	0.3531	2	1
-12.373	-0.94905	2	1
-5.0123	0.10778	2	1
1.3865	1.0265	1	2
2.7396	1.2207	1	2
-11.847	-0.87352	1	2
-9.1418	-0.48509	1	2
-7.1152	-0.19413	1	2
-4.3107	0.20851	2	2
-4.6814	0.15528	2	2
-0.92512	0.69457	2	2
1.951	1.1075	2	2
3.3625	1.3101	2	2
-12.901	-1.0248	1	3
-12.257	-0.93239	1	3
-5.4474	0.045317	1	3
-12.093	-0.90884	1	3
-16.74	-1.5759	1	3
-19.1	-1.9148	1	3
-16.131	-1.4886	1	3
-15.156	-1.3486	1	3
-11.926	-0.88482	1	3
-11.78	-0.8638	1	3
-3.705	0.29546	2	3
-11.835	-0.87177	2	3
-8.8776	-0.44716	2	3
-10.618	-0.69709	2	3
-8.7797	-0.43311	2	3
-8.2238	-0.35329	2	3
-1.3393	0.63511	2	3
-5.1702	0.085107	2	3
4.0953	1.4153	2	3
2.4396	1.1776	2	3
