# Supplementary material for: Breakdown of local information processing may underlie isoflurane anesthesia effects
Source: PLoS Comput Biol. 2017 Jun 1;13(6):e1005511. doi: 10.1371/journal.pcbi.1005511 (PMC5453425; doi:10.1371/journal.pcbi.1005511)
Supplement: S1 Dataset — (ZIP) [file pcbi.1005511.s001.zip › ferret_1_h_nsb_mean_param_interaction.csv]

mean PFC	sem PFC	mean V1	sem V1
15.053	0.46072	17.089	0.49377
17.75	0.39449	16.493	0.68893
15.66	0.14055	14.961	0.30023
