# Supplementary material for: Breakdown of local information processing may underlie isoflurane anesthesia effects
Source: PLoS Comput Biol. 2017 Jun 1;13(6):e1005511. doi: 10.1371/journal.pcbi.1005511 (PMC5453425; doi:10.1371/journal.pcbi.1005511)
Supplement: S1 Dataset — (ZIP) [file pcbi.1005511.s001.zip › ferret_1_h_nsb_raw_mean.csv]

raw data	factor direction	factor anesthesia
14.533	1	1
14.449	1	1
14.815	1	1
16.415	1	1
15.952	2	1
16.589	2	1
18.047	2	1
17.77	2	1
16.876	1	2
17.572	1	2
18.785	1	2
17.767	1	2
18.526	2	2
15.758	2	2
16.144	2	2
15.545	2	2
15.407	1	3
15.67	1	3
16.049	1	3
15.514	1	3
15.394	2	3
15.484	2	3
14.768	2	3
14.197	2	3
