# Supplementary material for: Breakdown of local information processing may underlie isoflurane anesthesia effects
Source: PLoS Comput Biol. 2017 Jun 1;13(6):e1005511. doi: 10.1371/journal.pcbi.1005511 (PMC5453425; doi:10.1371/journal.pcbi.1005511)
Supplement: S1 Dataset — (ZIP) [file pcbi.1005511.s001.zip › ferret_1_te_ksg_median_param_interaction.csv]

mean FB	sem FB	mean FF	sem FF
0.75034	0.11866	0.75098	0.18325
0.013298	0.27075	0.59463	0.092816
-1.472	0.28813	-0.033002	0.091691
