# Supplementary material for: Breakdown of local information processing may underlie isoflurane anesthesia effects
Source: PLoS Comput Biol. 2017 Jun 1;13(6):e1005511. doi: 10.1371/journal.pcbi.1005511 (PMC5453425; doi:10.1371/journal.pcbi.1005511)
Supplement: S1 Dataset — (ZIP) [file pcbi.1005511.s001.zip › ferret_1_te_ksg_raw_lmm.csv]

raw data	factor anesthesia	factor direction	factor recording
-0.0009937	1	0	1
-0.022897	1	0	1
-0.0043671	1	0	1
-0.0028396	1	0	1
-0.00088435	1	0	1
-0.02648	1	0	1
-0.018313	1	0	1
-0.0017405	1	0	1
-0.062005	1	0	1
-0.017932	1	0	1
-0.0019723	1	0	1
-0.029781	1	0	1
-0.026504	1	0	1
-0.0009974	1	0	1
-0.024929	1	0	1
-0.012859	1	0	1
-0.0062082	1	0	1
-0.0040531	1	0	1
-0.0088776	1	0	1
-0.0091501	1	0	1
-0.010524	1	0	1
-0.00457	1	0	1
-0.0020336	1	0	1
-0.0029884	1	0	1
-0.0076495	1	0	1
-0.0038743	1	0	1
-0.0056262	1	0	1
-0.033478	1	0	1
-0.002758	1	0	1
-0.0062658	1	0	1
-0.016463	1	0	1
-0.0025818	1	0	1
-0.015994	1	0	1
-0.0049631	1	0	1
-0.017531	1	0	1
-0.027361	1	0	1
-0.0067058	1	0	1
-0.0042747	1	0	1
-0.027143	1	0	1
-0.003526	1	0	1
-0.0070342	1	0	1
-0.0045367	1	0	1
-0.0037631	1	0	1
-0.0097804	1	0	1
-0.0016217	1	0	1
-0.013074	1	0	1
-0.0055065	1	0	1
-0.0040806	1	0	1
-0.0069837	1	0	1
-0.0059205	1	0	1
-0.0047475	1	0	1
-0.010964	1	0	1
-0.00018912	1	0	1
-0.0039628	1	0	1
-0.020539	1	0	1
-0.0053528	1	0	1
-0.0089873	1	0	1
-0.0092948	1	0	1
-0.014547	1	0	1
-0.074793	1	0	1
-0.032442	1	0	1
-0.01241	1	0	1
-0.0096938	1	0	1
-0.0055715	1	0	1
-0.017339	1	0	1
-0.011047	1	0	1
-0.0096127	1	0	1
-0.010259	1	0	1
-0.0043036	1	0	1
-0.0085908	1	0	1
-0.0059965	1	0	1
-0.0092197	1	0	1
-0.052022	1	0	1
-0.056219	1	0	1
-0.001125	1	0	1
-0.0047311	1	0	1
-0.025114	1	0	1
-0.0070337	1	0	1
-0.0042447	1	0	1
-0.019847	1	0	1
-0.015927	1	0	1
-0.014406	1	0	1
-0.0067223	1	0	1
-0.0036292	1	0	1
-0.0085599	1	0	1
-0.0051655	1	0	1
-0.018509	1	0	1
-0.0042807	1	0	1
-0.0082562	1	0	1
-0.047072	1	0	1
-0.010768	1	0	1
-0.0063893	1	0	1
-0.0074039	1	0	1
-0.009591	1	0	1
-0.0046192	1	0	1
-0.0080203	1	0	1
-0.16394	1	0	1
-0.0055632	1	0	1
-0.018767	1	0	1
-0.16332	1	0	1
-0.095852	1	0	1
-0.011336	1	0	1
-0.0046303	1	0	1
-0.010821	1	0	1
-0.06347	1	0	1
-0.080382	1	0	1
-0.011039	1	0	1
-0.0018948	1	0	1
-0.048124	1	0	1
-0.0074308	1	0	1
-0.016459	1	0	1
-0.024675	1	0	1
-0.019244	1	0	1
-0.0051498	1	0	1
-0.011129	1	0	1
-0.037538	1	0	1
-0.011956	1	0	1
-0.0031662	1	0	1
-0.0038537	1	0	1
-0.02914	1	0	1
-0.0047045	1	0	1
-0.0051782	1	0	1
-0.065072	1	0	1
-0.015654	1	0	1
-0.021152	1	0	1
-0.038616	1	0	1
-0.036044	1	0	1
-0.004453	1	0	1
-0.024806	1	0	1
-0.0035426	1	0	1
-0.045233	1	0	1
-0.04428	1	0	1
-0.0067329	1	0	1
-0.0029561	1	0	1
0.0023973	1	0	1
-0.00019676	1	0	1
-0.0086768	1	0	1
-0.1446	1	0	1
-0.011967	1	0	1
-0.0072427	1	0	1
-0.0087873	1	0	1
-0.053243	1	0	1
-0.055397	1	0	1
-0.00080569	1	0	1
-0.0019757	1	0	1
-0.010187	1	0	1
-0.010753	1	0	1
-0.0053957	1	0	1
-0.040461	1	0	1
-0.0057844	1	0	1
-0.057813	1	0	1
-0.015331	1	0	1
-0.0046312	1	0	1
-0.042687	1	0	1
-0.023711	1	0	1
-0.032947	1	0	1
-0.006274	1	0	1
-0.0021196	1	0	1
-0.011761	1	0	1
-0.0023725	1	0	1
-0.094472	1	0	1
-0.017186	1	0	1
-0.10258	1	0	1
-0.0044466	1	0	1
-0.010302	1	0	1
-0.038205	1	0	1
-0.0038044	1	0	1
-0.0098275	1	0	1
-0.018335	1	0	1
-0.014365	1	0	1
-0.015136	1	0	1
-0.0059908	1	0	1
-0.025202	1	0	1
-0.0088061	1	0	1
-0.0050589	1	0	1
-0.0060367	1	0	1
-0.0083143	1	0	1
-0.012351	1	0	1
-0.0034539	1	0	1
-0.0063903	1	0	1
-0.0065773	1	0	1
-0.009117	1	0	1
-0.0050523	1	0	1
-0.015638	1	0	1
-0.043736	1	0	1
-0.01613	1	0	1
-0.014618	1	0	1
-0.0056196	1	0	1
-0.0044144	1	0	1
-0.0078847	1	0	1
-0.0078654	1	0	1
-0.0059591	1	0	1
-0.0339	1	0	1
-0.032194	1	0	1
-0.008492	1	0	1
-0.011259	1	0	1
-0.0078384	1	0	1
-0.0062339	1	0	1
-0.01148	1	0	1
-0.004676	1	0	1
-0.0051913	1	0	1
-0.0024232	1	0	1
-0.021469	1	0	1
-0.022107	1	0	1
-0.0068423	1	0	1
-0.010899	1	0	1
-0.010186	1	0	1
-0.0061177	1	0	1
-0.044494	1	0	1
-0.0088976	1	0	1
-0.0069304	1	0	1
-0.011134	1	0	1
-0.04597	1	0	1
-0.0064802	1	0	1
-0.012504	1	0	1
-0.010185	1	0	1
-0.011688	1	0	1
-0.0060882	1	0	1
-0.028179	1	0	1
-0.028292	1	0	1
-0.0044395	1	0	1
-0.0034011	1	0	1
-0.019746	1	0	1
-0.060427	1	0	1
-0.0016809	1	0	1
-0.047725	1	0	1
-0.015015	1	0	1
-0.0080392	1	0	1
-0.0090531	1	0	1
-0.0027085	1	0	1
-0.012214	1	0	1
-0.0079639	1	0	1
-0.0094226	1	0	1
-0.010204	1	0	1
-0.035777	1	0	1
-0.015367	1	0	1
-0.011777	1	0	1
-0.00049657	1	0	1
-0.0014089	1	0	1
-0.0030116	1	0	2
0.02207	1	0	2
1.6491e-05	1	0	2
-0.0065202	1	0	2
-0.0012645	1	0	2
0.0016591	1	0	2
0.0047457	1	0	2
0.0035278	1	0	2
-0.0082784	1	0	2
0.0051981	1	0	2
0.009632	1	0	2
-0.018408	1	0	2
0.017385	1	0	2
0.00071323	1	0	2
-0.006648	1	0	2
-0.018036	1	0	2
-0.0060327	1	0	2
-0.018943	1	0	2
0.016196	1	0	2
0.0053246	1	0	2
0.011361	1	0	2
-0.011356	1	0	2
0.014021	1	0	2
0.004011	1	0	2
0.010029	1	0	2
-0.0020222	1	0	2
0.0050259	1	0	2
0.011268	1	0	2
-0.0028282	1	0	2
0.025478	1	0	2
0.023921	1	0	2
-0.049308	1	0	2
0.002209	1	0	2
0.00052187	1	0	2
0.0096247	1	0	2
-0.013714	1	0	2
-0.008842	1	0	2
0.019538	1	0	2
-0.0001841	1	0	2
-0.0030542	1	0	2
0.005004	1	0	2
0.012601	1	0	2
-0.055268	1	0	2
-0.0063423	1	0	2
0.0061266	1	0	2
-0.046631	1	0	2
0.0067004	1	0	2
0.00020648	1	0	2
-0.04494	1	0	2
0.017948	1	0	2
0.0026391	1	0	2
0.004828	1	0	2
-0.016548	1	0	2
0.0018933	1	0	2
-0.016365	1	0	2
-0.088597	1	0	2
-6.4147e-05	1	0	2
0.012664	1	0	2
-0.0021071	1	0	2
0.0013114	1	0	2
-0.015463	1	0	2
-0.0011809	1	0	2
-0.014254	1	0	2
0.0061668	1	0	2
-0.045105	1	0	2
-0.017453	1	0	2
-0.0063692	1	0	2
-0.0037631	1	0	2
-0.00071151	1	0	2
-0.019683	1	0	2
0.0015725	1	0	2
0.0053124	1	0	2
0.03734	1	0	2
0.0069407	1	0	2
0.013163	1	0	2
0.0082416	1	0	2
0.0070022	1	0	2
-0.039022	1	0	2
0.0021082	1	0	2
0.0029315	1	0	2
-0.01711	1	0	2
0.0022065	1	0	2
0.023054	1	0	2
0.0050619	1	0	2
0.01112	1	0	2
0.012636	1	0	2
-0.045577	1	0	2
-0.13043	1	0	2
0.029254	1	0	2
-0.0050584	1	0	2
-0.0010336	1	0	2
0.010365	1	0	2
0.0068438	1	0	2
0.0062392	1	0	2
-0.0094536	1	0	2
0.010495	1	0	2
0.024963	1	0	2
-0.0079381	1	0	2
0.01185	1	0	2
0.0075856	1	0	2
0.030332	1	0	2
-0.081536	1	0	2
-0.14041	1	0	2
-0.037241	1	0	2
-0.01788	1	0	2
-0.012489	1	0	2
0.0021912	1	0	2
-0.028939	1	0	2
0.0091907	1	0	2
-0.07743	1	0	2
0.0053313	1	0	2
-0.070454	1	0	2
0.0060147	1	0	2
-0.0023615	1	0	2
-0.025165	1	0	2
0.024847	1	0	2
-0.056393	1	0	2
0.0059313	1	0	2
-0.0042259	1	0	2
0.0085116	1	0	2
0.026612	1	0	2
0.00060122	1	0	2
-0.0008938	1	0	2
-0.0062931	1	0	2
-0.0038547	1	0	3
-0.023861	1	0	3
-0.012913	1	0	3
-0.017192	1	0	3
-0.0423	1	0	3
-0.026022	1	0	3
-0.013197	1	0	3
-0.03352	1	0	3
-0.013981	1	0	3
-0.020156	1	0	3
-0.0035958	1	0	3
-0.0063476	1	0	3
-0.036926	1	0	3
-0.0056531	1	0	3
-0.0048769	1	0	3
-0.011169	1	0	3
-0.0139	1	0	3
-0.0028204	1	0	3
-0.036359	1	0	3
-0.016597	1	0	3
-0.0099022	1	0	3
-0.018212	1	0	3
-0.0084289	1	0	3
-0.011531	1	0	3
-0.018868	1	0	3
-0.012197	1	0	3
-0.021011	1	0	3
-0.030256	1	0	3
-0.026548	1	0	3
-0.023266	1	0	3
-0.03199	1	0	3
-0.010992	1	0	3
-0.019501	1	0	3
-0.019759	1	0	3
-0.019765	1	0	3
-0.0090761	1	0	3
-0.0012968	1	0	3
-0.012117	1	0	3
-0.0069984	1	0	3
-0.016796	1	0	3
-0.042741	1	0	3
-0.029961	1	0	3
-0.010037	1	0	3
-0.018849	1	0	3
-0.025283	1	0	3
-0.020789	1	0	3
-0.025817	1	0	3
-0.01072	1	0	3
-0.015187	1	0	3
-0.016036	1	0	3
-0.022907	1	0	3
-0.01659	1	0	3
-0.026491	1	0	3
-0.015829	1	0	3
-0.047941	1	0	3
-0.018036	1	0	3
-0.025949	1	0	3
-0.019644	1	0	3
-0.046404	1	0	3
-0.009722	1	0	3
-0.035847	1	0	3
-0.022986	1	0	3
-0.015695	1	0	3
-0.010793	1	0	3
-0.031038	1	0	3
-0.0064905	1	0	3
-0.017024	1	0	3
-0.0091521	1	0	3
-0.026406	1	0	3
-0.018305	1	0	3
-0.011921	1	0	3
-0.010162	1	0	3
-0.015836	1	0	3
-0.014248	1	0	3
-0.015787	1	0	3
-0.0048383	1	0	3
-0.049981	1	0	3
-0.049898	1	0	3
-0.021654	1	0	3
-0.0056009	1	0	3
-0.020946	1	0	3
-0.012685	1	0	3
-0.012935	1	0	3
-0.05202	1	0	4
-0.032831	1	0	4
-0.018437	1	0	4
-0.032759	1	0	4
-0.027355	1	0	4
-0.013411	1	0	4
-0.015736	1	0	4
-0.014527	1	0	4
-0.021681	1	0	4
-0.040636	1	0	4
-0.010137	1	0	4
-0.0096282	1	0	4
-0.022115	1	0	4
-0.014468	1	0	4
-0.023656	1	0	4
-0.019273	1	0	4
-0.010565	1	0	4
-0.023671	1	0	4
-0.0091174	1	0	4
-0.024174	1	0	4
-0.0031559	1	0	4
-0.0091931	1	0	4
-0.013409	1	0	4
-0.0092139	1	0	4
-0.012821	1	0	4
-0.017238	1	0	4
-0.0095989	1	0	4
-0.011295	1	0	4
-0.021497	1	0	4
-0.010576	1	0	4
-0.011044	1	0	4
-0.032028	1	0	4
-0.013517	1	0	4
-0.0094466	1	0	4
-0.026014	1	0	4
-0.012137	1	0	4
-0.0073682	1	0	4
-0.024108	1	0	4
-0.0036817	1	0	4
-0.0090758	1	0	4
-0.012867	1	0	4
-0.009851	1	0	4
-0.015762	1	0	4
-0.0039057	1	0	4
-0.011168	1	0	4
-0.008464	1	0	4
-0.0084576	1	0	4
-0.0135	1	0	4
-0.0094875	1	0	4
-0.025065	1	0	4
-0.013951	1	0	4
-0.021656	1	0	4
-0.024095	1	0	4
-0.009206	1	0	4
-0.0094822	1	0	4
-0.0093021	1	0	4
-0.016617	1	0	4
-0.009404	1	0	4
-0.018073	1	0	4
-0.021701	1	0	4
-0.0079388	1	0	4
-0.017075	1	0	4
-0.021683	1	0	4
-0.015654	1	0	4
-0.0075232	1	0	4
-0.029114	1	0	4
-0.018952	1	0	4
-0.025438	1	0	4
-0.019545	1	0	4
-0.01411	1	0	4
-0.01333	1	0	4
-0.010215	1	0	4
-0.02734	1	0	4
-0.011177	1	0	4
-0.011017	1	0	4
-0.0076053	1	0	4
-0.026529	1	0	4
-0.022099	1	0	4
-0.010174	1	0	4
-0.028884	1	0	4
-0.027918	1	0	4
-0.021278	1	0	4
-0.019466	1	0	4
-0.024815	1	0	4
-0.018477	1	0	4
-0.024786	1	0	4
-0.0019888	1	0	4
-0.0089809	1	0	4
-0.029655	1	0	4
-0.031579	1	0	4
-0.022501	1	0	4
-0.028268	1	0	4
-0.041789	1	0	4
-0.012576	1	0	4
-0.026377	1	0	4
-0.014803	1	0	4
-0.0098726	1	0	4
-0.024812	1	0	4
-0.031067	1	0	4
-0.0091064	1	0	4
-0.020278	1	0	4
-0.027493	1	0	4
-0.020803	1	0	4
-0.021438	1	0	4
-0.018048	1	0	4
-0.023892	1	0	4
-0.014803	1	0	4
-0.0077151	1	0	4
-0.027225	1	0	4
-0.0093918	1	0	4
-0.011544	1	0	4
-0.006288	1	0	4
-0.012189	1	0	4
-0.01048	1	0	4
-0.01593	1	0	4
-0.023797	1	0	4
-0.02603	1	0	4
-0.032648	1	0	4
-0.018029	1	0	4
-0.019603	1	0	4
-0.053819	1	0	4
-0.013808	1	0	4
-0.014896	1	0	4
-0.030892	1	0	4
-0.015056	1	0	4
-0.022135	1	0	4
-0.010485	1	0	4
-0.029302	1	0	4
-0.013933	1	0	4
-0.030254	1	0	4
-0.014705	1	0	4
-0.010186	1	0	4
-0.011017	1	0	4
-0.012174	1	0	4
-0.012791	1	0	4
-0.0079373	1	0	4
-0.016002	1	0	4
-0.010502	1	0	4
-0.028613	1	0	4
-0.025155	1	0	4
-0.011032	1	0	4
-0.01905	1	0	4
-0.00014169	1	0	4
-0.011423	1	0	4
-0.0058738	1	0	4
-0.015338	1	0	4
-0.01808	1	0	4
-0.018934	1	0	4
-0.025066	1	0	4
-0.01494	1	0	4
-0.0061894	1	0	4
-0.010983	1	0	4
-0.012728	1	0	4
-0.012249	1	0	4
-0.015124	1	0	4
-0.017283	1	0	4
-0.047768	1	0	4
-0.018686	1	0	4
-0.039197	1	0	4
-0.018111	1	0	4
-0.029411	1	0	4
-0.021785	1	0	4
-0.0060661	1	0	4
-0.0094579	1	0	4
-0.012158	1	0	4
-0.011771	1	0	4
-0.028267	1	0	4
-0.050188	1	0	4
-0.024544	1	0	5
-0.019412	1	0	5
-0.032223	1	0	5
-0.013855	1	0	5
-0.058814	1	0	5
-0.034048	1	0	5
-0.046275	1	0	5
-0.046861	1	0	5
-0.036711	1	0	5
-0.015109	1	0	5
-0.0061905	1	0	5
-0.020432	1	0	5
-0.043754	1	0	5
-0.046583	1	0	5
-0.0093177	1	0	5
-0.014788	1	0	5
-0.0070846	1	0	5
-0.018655	1	0	5
-0.0098037	1	0	5
-0.020654	1	0	5
-0.015633	1	0	5
-0.015417	1	0	5
-0.0073544	1	0	5
-0.014333	1	0	5
-0.029591	1	0	5
-0.014644	1	0	5
-0.012623	1	0	5
-0.0074209	1	0	5
-0.0080653	1	0	5
-0.0068389	1	0	5
-0.013757	1	0	5
-0.016758	1	0	5
-0.0042516	1	0	5
-0.0087071	1	0	5
-0.007828	1	0	5
-0.012894	1	0	5
-0.0093437	1	0	5
-0.027733	1	0	5
-0.0060604	1	0	5
-0.02367	1	0	5
-0.024642	1	0	5
-0.0079049	1	0	5
-0.0077749	1	0	5
-0.014471	1	0	5
-0.026905	1	0	5
-0.02567	1	0	5
-0.02097	1	0	5
-0.015816	1	0	5
-0.055098	1	0	5
-0.023553	1	0	5
-0.037044	1	0	5
-0.014181	1	0	5
-0.024845	1	0	5
-0.017247	1	0	5
-0.0053599	1	0	5
-0.01194	1	0	5
-0.010548	1	0	5
-0.012804	1	0	5
-0.01971	1	0	5
-0.027158	1	0	5
-0.02312	1	0	5
-0.032104	1	0	5
-0.010938	1	0	5
-0.02054	1	0	5
-0.0064858	1	0	5
-0.0068874	1	0	5
-0.027345	1	0	5
-0.013626	1	0	5
-0.011529	1	0	5
-0.011077	1	0	5
-0.0081692	1	0	5
-0.0066239	1	0	5
-0.0093357	1	0	5
-0.018402	1	0	5
-0.0045058	1	0	5
-0.011452	1	0	5
-0.041218	1	0	5
-0.022247	1	0	5
-0.044554	1	0	5
-0.013449	1	0	5
-0.012041	1	0	5
-0.02295	1	0	5
-0.016585	1	0	5
-0.044587	1	0	5
-0.042787	1	0	5
-0.010209	1	0	5
-0.0084666	1	0	5
-0.020987	1	0	5
-0.037962	1	0	5
-0.034731	1	0	5
-0.024064	1	0	5
-0.037578	1	0	5
-0.029366	1	0	5
-0.099577	1	0	5
-0.031581	1	0	5
-0.023581	1	0	5
-0.0068622	1	0	5
-0.0084756	1	0	5
-0.012007	1	0	5
-0.011652	1	0	5
-0.021657	1	0	5
-0.035304	1	0	5
-0.010155	1	0	5
-0.019485	1	0	5
-0.021165	1	0	5
-0.041284	1	0	5
-0.020022	1	0	5
-0.030158	1	0	5
-0.035017	1	0	5
-0.039113	1	0	5
-0.047014	1	0	5
-0.035009	1	0	5
-0.051441	1	0	5
-0.01964	1	0	5
-0.022774	1	0	5
-0.022469	1	0	5
-0.044035	1	0	5
-0.014564	1	0	5
-0.009287	1	0	5
-0.015503	1	0	5
-0.0046451	1	0	5
-0.012774	1	0	5
-0.015472	1	0	5
-0.0076865	1	0	5
-0.0014017	1	0	5
-0.0060425	1	0	5
-0.01287	1	0	5
-0.016678	1	0	5
-0.0069016	1	0	5
-0.020625	1	0	5
-0.014969	1	0	5
-0.018737	1	0	5
-0.030349	1	0	5
-0.019764	1	0	5
-0.043133	1	0	5
-0.024578	1	0	5
-0.017728	1	0	5
-0.0099838	1	0	5
-0.011163	1	0	5
-0.01452	1	0	5
-0.012989	1	0	5
-0.015905	1	0	5
-0.023189	1	0	5
-0.015193	1	0	5
-0.014259	1	0	5
-0.032516	1	0	5
-0.048719	1	0	5
-0.039475	1	0	5
-0.019784	1	0	5
-0.01241	1	0	5
-0.0067581	1	0	5
-0.0011191	1	0	5
-0.034976	1	0	5
-0.055214	1	0	5
-0.019202	1	0	5
-0.019367	1	0	5
-0.017594	1	0	5
-0.015547	1	0	5
-0.041174	1	0	5
-0.072025	1	0	5
-0.049593	1	0	5
-0.018609	1	0	5
-0.0045877	1	0	5
-0.043343	1	0	5
-0.12455	1	0	5
-0.051807	1	0	5
-0.069102	1	0	5
-0.068391	1	0	5
-0.033694	1	0	5
-0.055039	1	0	5
-0.045349	1	0	5
-0.022036	1	0	5
-0.032213	1	0	5
-0.037412	1	0	5
-0.044199	1	0	5
-0.03249	1	0	5
-0.015267	1	0	5
-0.020762	1	0	5
-0.0070095	1	0	5
-0.0097908	1	0	5
-0.0024353	1	0	5
-0.0063057	1	0	5
-0.011765	1	0	5
-0.028795	1	0	6
-0.029365	1	0	6
-0.024905	1	0	6
-0.018768	1	0	6
-0.052657	1	0	6
0.00079241	1	0	6
-0.014665	1	0	6
-0.033894	1	0	6
-0.020165	1	0	6
-0.017342	1	0	6
-0.016201	1	0	6
-0.016211	1	0	6
-0.012068	1	0	6
-0.021115	1	0	6
-0.031502	1	0	6
-0.013376	1	0	6
-0.023884	1	0	6
-0.020116	1	0	6
-0.021167	1	0	6
-0.016282	1	0	6
-0.014301	1	0	6
-0.0095042	1	0	6
-0.020749	1	0	6
-0.02674	1	0	6
-0.019897	1	0	6
-0.022979	1	0	6
-0.018143	1	0	6
-0.020471	1	0	6
-0.013981	1	0	6
-0.012426	1	0	6
-0.01625	1	0	6
-0.044903	1	0	6
-0.025629	1	0	6
-0.025382	1	0	6
-0.013262	1	0	6
-0.019347	1	0	6
-0.035086	1	0	6
-0.0072069	1	0	6
-0.013537	1	0	6
-0.01991	1	0	6
-0.026351	1	0	6
-0.019772	1	0	6
-0.017875	1	0	6
-0.015567	1	0	6
-0.022668	1	0	6
-0.012822	1	0	6
-0.033954	1	0	6
-0.028839	1	0	6
-0.018249	1	0	6
-0.019772	1	0	6
-0.039362	1	0	6
-0.025993	1	0	6
-0.031095	1	0	6
-0.021587	1	0	6
-0.021931	1	0	6
-0.0074469	1	0	6
-0.01695	1	0	6
-0.0088092	1	0	6
-0.0084166	1	0	6
-0.013995	1	0	6
-0.0070072	1	0	6
-0.013829	1	0	6
-0.012088	1	0	6
-0.027004	1	0	6
-0.05509	1	0	6
-0.021874	1	0	6
-0.031544	1	0	6
-0.029874	1	0	6
-0.01836	1	0	6
-0.015139	1	0	6
-0.016302	1	0	6
-0.013719	1	0	6
-0.010365	1	0	6
-0.028561	1	0	6
-0.046186	1	0	6
-0.0032015	1	0	6
-0.017431	1	0	6
-0.012985	1	0	6
-0.013355	1	0	6
-0.011633	1	0	6
-0.0044135	1	0	6
-0.020992	1	0	6
-0.0085756	1	0	6
-0.01434	1	0	6
-0.012075	1	0	6
-0.020226	1	0	6
-0.0098592	1	0	6
-0.0094513	1	0	6
-0.014391	1	0	6
-0.022658	1	0	6
-0.020627	1	0	6
-0.015322	1	0	6
-0.010719	1	0	6
-0.0048854	1	0	6
-0.015373	1	0	6
0.0026426	1	0	6
-0.0039576	1	0	6
-0.016977	1	0	6
-0.0033605	1	0	6
-0.012842	1	0	6
-0.015268	1	0	6
-0.024455	1	0	6
-0.018219	1	0	6
-0.017979	1	0	6
-0.010747	1	0	6
-0.028998	1	0	6
-0.02212	1	0	6
-0.024755	1	0	6
-0.0072989	1	0	6
-0.024814	1	0	6
-0.019965	1	0	6
-0.013928	1	0	6
-0.013126	1	0	6
-0.0089529	1	0	6
-0.014781	1	0	6
-0.028939	1	0	6
-0.019097	1	0	6
-0.014232	1	0	6
-0.012361	1	0	6
-0.0064868	1	0	6
-0.0084565	1	0	6
-0.010313	1	0	6
-0.020271	1	0	6
-0.01621	1	0	6
-0.0058089	1	0	6
-0.013013	1	0	6
-0.0073663	1	0	6
-0.01288	1	0	6
-0.0080034	1	0	6
-0.01231	1	0	6
-0.0025914	1	0	6
-0.01008	1	0	6
-0.015344	1	0	6
-0.011507	1	0	6
-0.014524	1	0	6
-0.018874	1	0	6
-0.013057	1	0	6
-0.015161	1	0	6
-0.010192	1	0	6
-0.012649	1	0	6
-0.024522	1	0	6
-0.006883	1	0	6
-0.030378	1	0	6
-0.0265	1	0	6
-0.012545	1	0	6
-0.014302	1	0	6
-0.016231	1	0	6
-0.014175	1	0	6
-0.02108	1	0	6
-0.022595	1	0	6
-0.017912	1	0	6
-0.0086526	1	0	6
-0.040048	1	0	6
-0.012012	1	0	6
-0.02697	1	0	6
-0.0087775	1	0	6
-0.011658	1	0	6
-0.048211	1	0	6
-0.028002	1	0	6
-0.015782	1	0	6
-0.022596	1	0	6
-0.011513	1	0	6
-0.013875	1	0	6
-0.01141	1	0	6
-0.018537	1	0	6
-0.070226	1	0	6
-0.01266	1	0	6
-0.020066	1	0	6
-0.027213	1	0	6
-0.019567	1	0	6
-0.040844	1	0	6
-0.013879	1	0	6
-0.018609	1	0	6
-0.004257	1	0	6
-0.01217	1	0	6
-0.023745	1	0	6
-0.016161	1	0	6
-0.011372	1	0	6
-0.0056365	1	0	6
-0.023323	1	0	6
-0.0091791	1	0	6
-0.059096	1	0	6
-0.031831	1	0	6
-0.013039	1	0	6
-0.014228	1	0	6
-0.058175	1	0	6
-0.014702	1	0	6
-0.019266	1	0	6
-0.015463	1	0	6
-0.022077	1	0	6
-0.050628	1	0	6
-0.029761	1	0	6
-0.032555	1	0	6
-0.027104	1	0	6
-0.0213	1	0	6
-0.022553	1	0	6
-0.017383	1	0	6
-0.016507	1	0	6
-0.017098	1	0	6
-0.020506	1	0	6
-0.019311	1	0	6
-0.010088	1	0	6
-0.032404	1	0	6
-0.054664	1	0	6
-0.020052	1	0	6
-0.01911	1	0	6
-0.0074465	1	0	6
-0.0074344	1	0	6
-0.014753	1	0	6
-0.026892	1	0	6
-0.040434	1	0	6
-0.028905	1	0	6
-0.011808	1	0	6
-0.013012	1	0	6
-0.010558	1	0	6
-0.0058954	1	0	6
-0.019207	1	0	6
-0.0083308	1	0	6
-0.011703	1	0	6
-0.020231	1	0	6
-0.0055927	1	0	6
-0.012673	1	0	6
-0.0070471	1	0	6
-0.011497	1	0	6
-0.010491	1	0	6
-0.0036482	1	0	6
-0.01634	1	0	6
-0.013944	1	0	6
-0.0084025	1	0	6
0.0041378	1	0	6
-0.018748	1	0	6
-0.023816	1	0	6
-0.013184	1	0	6
-0.0097464	1	0	6
-0.012639	1	0	6
-0.0049953	1	0	6
-0.0061547	1	0	6
-0.048093	1	0	6
-0.017429	1	0	6
-0.0078372	1	0	6
-0.017781	1	0	6
-0.017823	1	0	6
-0.009739	1	0	6
-0.021079	1	0	6
-0.011022	1	0	6
-0.0089946	1	0	6
-0.011261	1	0	6
-0.0036029	1	0	6
-0.015702	1	0	6
-0.0046334	1	0	6
-0.01159	1	0	6
-0.023661	1	0	6
-0.014893	1	0	6
-0.010536	1	0	6
-0.008098	1	0	6
-0.017038	1	0	6
-0.014359	1	0	6
-0.0073028	1	0	6
-0.007563	1	0	6
-0.014485	1	0	6
-0.0079544	1	0	6
-0.0047921	1	0	6
-0.0048101	1	0	6
-0.017766	1	0	6
-0.0084853	1	0	6
-0.016302	1	0	6
-0.019382	1	0	6
-0.015145	1	0	6
-0.01797	1	0	6
-0.022236	1	0	6
-0.010108	1	0	6
-0.011989	1	0	6
-0.012011	1	0	6
-0.01162	1	0	6
-0.0088453	1	0	6
-0.014417	1	0	6
-0.0095202	1	0	6
-0.010072	1	0	6
-0.0074088	1	0	6
-0.010226	1	0	6
-0.012433	1	0	6
-0.0092623	1	0	6
-0.047978	1	0	6
-0.013792	1	0	6
-0.00994	1	0	6
-0.015778	1	0	6
-0.047337	1	0	7
-0.018594	1	0	7
-0.024951	1	0	7
-0.047882	1	0	7
-0.046096	1	0	7
-0.035365	1	0	7
-0.035783	1	0	7
-0.019619	1	0	7
-0.075632	1	0	7
-0.019798	1	0	7
-0.011123	1	0	7
-0.010262	1	0	7
-0.096374	1	0	7
-0.011332	1	0	7
-0.024477	1	0	7
-0.0079147	1	0	7
-0.010538	1	0	7
-0.065547	1	0	7
-0.042519	1	0	7
-0.085515	1	0	7
-0.016034	1	0	7
-0.035528	1	0	7
-0.0044999	1	0	7
-0.024086	1	0	7
-0.017093	1	0	7
-0.086033	1	0	7
-0.042942	1	0	7
-0.024474	1	0	7
-0.020087	1	0	7
-0.0092023	1	0	7
-0.036417	1	0	7
-0.0058637	1	0	7
-0.0061535	1	0	7
-0.024418	1	0	7
-0.0070216	1	0	7
-0.038706	1	0	7
-0.022082	1	0	7
-0.0059798	1	0	7
-0.063184	1	0	7
-0.018954	1	0	7
-0.0066679	1	0	7
-0.018504	1	0	7
-0.069293	1	0	7
-0.0025443	1	0	7
-0.017516	1	0	7
-0.0036396	1	0	7
-0.024931	1	0	7
-0.024528	1	0	7
-0.028105	1	0	7
-0.011423	1	0	7
-0.023538	1	0	7
-0.054199	1	0	7
-0.039318	1	0	7
-0.0050046	1	0	7
-0.031078	1	0	7
-0.021335	1	0	7
-0.0022187	1	0	7
-0.015837	1	0	7
-0.030671	1	0	7
-0.0209	1	0	7
-0.051261	1	0	7
-0.05039	1	0	7
-0.036333	1	0	7
-0.034437	1	0	7
-0.016859	1	0	7
-0.019998	1	0	7
-0.014003	1	0	7
-0.0088221	1	0	7
-0.0049974	1	0	7
-0.015512	1	0	7
-0.010203	1	0	7
-0.091763	1	0	7
-0.001122	1	0	7
-0.010701	1	0	7
-0.067284	1	0	7
-0.0086531	1	0	7
-0.0059689	1	0	7
-0.020395	1	0	7
0.0021845	1	0	7
-0.05555	1	0	7
-0.0021249	1	0	7
-0.016306	1	0	7
-0.021264	1	0	7
-0.0067029	1	0	7
-0.029834	1	0	7
-0.011344	1	0	7
-0.015034	1	0	7
-0.015835	1	0	7
-0.017748	1	0	7
-0.012667	1	0	7
-0.0076071	1	0	7
-0.038961	1	0	7
-0.035913	1	0	7
-0.030093	1	0	7
-0.10075	1	0	7
-0.00048828	1	0	7
-0.083728	1	0	7
-0.020527	1	0	7
-0.011616	1	0	7
-0.030054	1	0	7
-0.041164	1	0	7
-0.016168	1	0	7
-0.034119	1	0	7
-0.037991	1	0	7
-0.035024	1	0	7
-0.023674	1	0	7
-0.075232	1	0	7
-0.013855	1	0	7
-0.024979	1	0	7
-0.0082853	1	0	7
-0.027906	1	0	8
-0.03678	1	0	8
-0.029501	1	0	8
-0.028399	1	0	8
-0.010272	1	0	8
-0.0426	1	0	8
-0.026298	1	0	8
-0.022608	1	0	8
-0.0028342	1	0	8
-0.053238	1	0	8
-0.0084049	1	0	8
-0.021726	1	0	8
-0.014337	1	0	8
-0.0093615	1	0	8
-0.012101	1	0	8
-0.0014986	1	0	8
-0.011726	1	0	8
-0.0019903	1	0	8
-0.010405	1	0	8
-0.0080828	1	0	8
-0.014322	1	0	8
-0.0056148	1	0	8
-0.020058	1	0	8
-0.045736	1	0	8
-0.056984	1	0	8
-0.0039784	1	0	8
-0.030377	1	0	8
-0.0094975	1	0	8
-0.010644	1	0	8
-0.00030893	1	0	8
-0.0124	1	0	8
-0.011493	1	0	8
-0.0096043	1	0	8
-0.0093092	1	0	8
-0.011293	1	0	8
-0.0021543	1	0	8
-0.013444	1	0	8
-0.020181	1	0	8
-0.028519	1	0	8
-0.0096197	1	0	8
-0.013491	1	0	8
-0.0051055	1	0	8
-0.0087681	1	0	8
-0.0027513	1	0	8
-0.0094072	1	0	8
-0.01733	1	0	8
-0.012288	1	0	8
-0.0036509	1	0	8
-0.013089	1	0	8
-0.0094162	1	0	8
-0.0082294	1	0	8
-0.013353	1	0	8
-0.017421	1	0	8
-0.026585	1	0	8
-0.0307	1	0	8
-0.020444	1	0	8
-0.0045071	1	0	8
-0.0071286	1	0	8
-0.0091825	1	0	8
-0.010163	1	0	8
-0.0088249	1	0	8
-0.016203	1	0	8
-0.066012	1	0	8
-0.011236	1	0	8
-0.011243	1	0	8
-0.0011662	1	0	8
-0.017777	1	0	8
-0.010742	1	0	8
-0.015821	1	0	8
-0.020461	1	0	8
-0.00082288	1	0	8
-0.02045	1	0	8
-0.050906	1	0	8
-0.023453	1	0	8
-0.019501	1	0	8
-0.057694	1	0	8
-0.019785	1	0	8
-0.0079951	1	0	8
-0.04104	1	0	8
-0.0070792	1	0	8
-0.013325	1	0	8
-0.015216	1	0	8
-0.07912	1	0	8
-0.020437	1	0	8
-0.019895	1	0	8
-0.034421	1	0	8
-0.011924	1	0	8
-0.034847	1	0	8
-0.0080883	1	0	8
-0.025729	1	0	8
-0.012896	1	0	8
-0.05356	1	0	8
-0.025371	1	0	8
-0.020516	1	0	8
-0.0046156	1	0	8
-0.020375	1	0	8
-0.040937	1	0	8
-0.046257	1	0	8
-0.0077097	1	0	8
-0.025435	1	0	8
-0.019703	1	0	8
-0.020935	1	0	8
-0.012	1	0	8
-0.02461	1	0	8
-0.018259	1	0	8
-0.02514	1	0	8
-0.0051999	1	0	8
-0.013116	1	0	8
-0.0018368	1	0	8
-0.031144	1	0	8
-0.010779	1	0	8
-0.014323	1	0	8
-0.019471	1	0	8
-0.010557	1	0	8
-0.049577	1	0	8
-0.021528	1	0	8
-0.020853	1	0	8
-0.031339	1	0	8
-0.041328	1	0	8
-0.0078238	1	0	8
-0.0093039	1	0	8
-0.014255	1	0	8
-0.013278	1	0	8
-0.014234	1	0	8
-0.028536	1	0	8
-0.010831	1	0	8
-0.014438	1	0	8
-0.0094839	1	0	8
-0.014648	1	0	8
-0.018539	1	0	8
-0.016349	1	0	8
-0.0065339	1	0	8
-0.016864	1	0	8
-0.015798	1	0	8
-0.0090784	1	0	8
-0.0093996	1	0	8
-0.017827	1	0	8
-0.033598	1	0	8
-0.010531	1	0	8
-0.0023292	1	0	8
-0.015555	1	0	8
-0.036543	1	0	8
-0.029815	1	0	8
-0.009478	1	0	8
-0.014147	1	0	8
-0.042651	1	0	8
-0.017089	1	0	8
-0.024261	1	0	8
-0.0059772	1	0	8
-0.020363	1	0	8
-0.015034	1	0	8
-0.011137	1	0	8
-0.028047	1	0	8
-0.011221	1	0	8
-0.025541	1	0	8
-0.0091053	1	0	8
-0.011738	1	0	8
-0.024031	1	0	8
-0.015927	1	0	8
-0.018157	1	0	8
-0.012913	1	0	8
-0.010996	1	0	8
-0.01654	1	0	8
-0.021034	1	0	8
-0.025345	1	0	8
-0.0088846	1	0	8
-0.042003	1	0	8
-0.016999	1	0	8
-0.042143	1	0	8
-0.0094949	1	0	8
-0.0069338	1	0	8
-0.0085732	1	0	8
-0.0090889	1	0	8
-0.012191	1	0	8
-0.02104	1	0	8
-0.01561	1	0	8
-0.010308	1	0	8
-0.012118	1	0	8
-0.0091706	1	0	8
-0.013226	1	0	8
-0.0090155	1	0	8
-0.077165	1	0	8
-0.005855	1	0	8
-0.029477	1	0	8
-0.011331	1	0	8
-0.0056078	1	0	8
-0.0085636	1	0	8
-0.016556	1	0	8
-0.016435	1	0	8
-0.010758	1	0	8
-0.011664	1	0	8
-0.01713	1	0	8
-0.013095	1	0	8
-0.011121	1	0	8
-0.024838	1	0	8
-0.0069527	1	0	8
-0.0075052	1	0	8
-0.014728	1	0	8
-0.010873	1	0	8
-0.036983	1	0	8
-0.0072452	1	0	8
-0.0058428	1	0	8
-0.0069888	1	0	8
-0.0063606	1	0	8
-0.0075924	1	0	8
-0.0074112	1	0	8
-0.014309	1	0	8
-0.025987	1	0	8
-0.010937	1	0	8
-0.020691	1	0	8
-0.0044582	1	0	8
-0.0080973	1	0	8
-0.02268	1	0	8
-0.012232	1	0	8
-0.015728	1	0	8
-0.010776	1	0	8
-0.018387	1	0	8
-0.0018113	1	0	8
-0.0055518	1	0	8
-0.016477	1	0	8
-0.0096326	1	0	8
-0.010738	1	0	8
-0.015315	1	0	8
-0.020906	1	0	8
-0.033688	1	0	8
-0.0070028	1	0	8
-0.0067335	1	0	8
-0.0095035	1	0	8
-0.010561	1	0	8
-0.0061736	1	0	8
-0.0072133	1	0	8
-0.020442	1	0	8
-0.011318	1	0	8
-0.0065557	1	0	8
-0.013402	1	0	8
-0.011273	1	0	8
-0.018073	1	0	8
-0.016063	1	0	8
-0.01134	1	0	8
-0.0041154	1	0	8
-0.0094928	1	0	8
-0.010173	1	0	8
-0.011652	1	0	8
-0.009188	1	0	8
-0.0073416	1	0	8
-0.017698	1	0	8
-0.0075163	1	0	8
-0.037589	1	0	8
-0.0083444	1	0	8
-0.035237	1	0	8
-0.0070612	1	0	8
-0.028153	1	0	8
-0.05606	1	0	8
-0.0040422	1	0	8
-0.010036	1	0	8
-0.04259	1	0	8
-0.013167	1	0	8
-0.030856	1	0	8
-0.052513	1	0	8
-0.011096	1	0	8
-0.012498	1	0	8
-0.0056923	1	0	8
-0.020419	1	0	8
-0.056222	1	0	8
-0.0066866	1	0	8
-0.014049	1	0	8
-0.01889	1	0	8
-0.0055555	1	0	8
-0.023843	1	0	8
-0.010011	1	0	8
-0.021588	1	0	8
-0.011571	1	0	8
-0.0093624	1	0	8
-0.0071301	1	0	8
-0.014371	1	0	8
-0.047412	1	0	8
-0.023991	1	0	8
-0.0079323	1	0	8
-0.010472	1	0	8
-0.014227	1	0	8
-0.016443	1	0	8
-0.010855	1	0	8
-0.083212	1	0	8
-0.025499	1	0	8
-0.0091472	1	0	8
-0.013555	1	0	8
-0.012587	1	0	8
-0.006613	1	0	8
-0.026143	1	0	8
-0.010926	1	0	8
-0.022952	1	0	8
-0.037034	1	0	8
-0.032499	1	0	8
-0.018092	1	0	8
-0.022867	1	0	8
-0.0062097	1	0	8
-0.031289	1	0	8
-0.014344	1	0	8
-0.0086376	1	0	8
-0.0046376	1	0	8
-0.01699	1	0	8
-0.015014	1	0	8
-0.021679	1	0	8
-0.016895	1	0	8
-0.0078801	1	0	8
-0.026011	1	0	8
-0.071776	1	0	8
-0.0071237	1	0	8
-0.030528	1	0	8
-0.004335	1	0	8
-0.0148	1	0	8
-0.0079252	1	0	8
-0.022609	1	0	8
-0.021799	1	0	8
-0.044292	1	0	8
-0.012843	1	0	8
-0.018991	1	0	8
-0.0063994	1	0	8
-0.0065754	1	0	8
-0.010693	1	0	8
-0.014338	1	0	8
-0.010038	1	0	8
-0.023263	1	0	8
-0.0095427	1	0	8
-0.0037429	1	0	8
-0.02637	1	0	8
-0.0053712	1	0	8
-0.0083071	1	0	8
0.0030735	1	0	8
-0.015817	1	0	8
-0.003518	1	0	8
-0.018926	1	0	8
-0.013424	1	0	8
-0.0012571	1	0	8
-0.012347	1	0	8
-0.0025641	1	0	8
-0.011605	1	0	8
-0.010761	1	0	8
-0.0074594	1	0	8
-0.012881	1	0	8
-0.0081536	1	0	8
-0.007553	1	0	8
-0.0097585	1	0	8
-0.0098837	1	0	8
-0.0088978	1	0	8
-0.0042498	1	0	8
-0.0039951	1	0	8
-0.0096582	1	0	8
-0.14731	1	0	8
-0.013984	1	0	8
-0.014276	1	0	8
-0.0093382	1	0	8
-0.0014443	1	0	8
-0.0067652	1	0	8
-0.011311	1	0	8
-0.0048714	1	0	8
-0.073557	1	0	8
-0.014198	1	0	8
-0.0061841	1	0	8
-0.0078847	1	0	8
-0.015446	1	0	8
-0.0097595	1	0	8
-0.032745	1	0	8
-0.009261	1	0	8
-0.015898	1	0	8
-0.016897	1	0	8
-0.010116	1	0	8
-0.027004	1	0	8
-0.013265	1	0	8
-0.02133	1	0	8
-0.0066642	1	0	8
-0.0081618	1	0	8
-0.070004	1	0	8
-0.065562	1	0	8
-0.015092	1	0	8
-0.017873	1	0	8
-0.0061762	1	0	8
-0.098694	1	0	8
-0.013751	1	0	8
-0.012029	1	0	8
-0.0015703	1	0	8
-0.020085	1	0	8
-0.0056866	1	0	8
-0.017279	1	0	8
-0.021235	1	0	8
-0.0084425	1	0	8
-0.024947	1	0	8
-0.022959	1	0	8
-0.014242	1	0	8
-0.0084488	1	0	8
-0.031864	1	0	8
-0.0095482	1	0	8
-0.0071643	1	0	8
-0.0044868	1	0	8
-0.0091528	1	0	8
-0.014944	1	0	8
-0.0086453	1	0	8
-0.010964	1	0	8
-0.029249	1	0	8
-0.021055	1	0	8
-0.021531	1	0	8
-0.01186	1	0	8
-0.0074191	1	0	8
-0.012593	1	0	8
-0.009273	1	0	8
-0.01307	1	0	8
-0.0092707	1	0	8
-0.024312	1	0	8
-0.014619	1	0	8
-0.011622	1	0	8
-0.03503	1	0	8
-0.026891	1	0	8
-0.0037069	1	0	8
-0.0097025	1	0	8
-0.016575	1	0	8
-0.012672	1	0	8
-0.021031	1	0	8
-0.011951	1	0	8
-0.00654	1	0	8
-0.027517	1	0	8
-0.012085	1	0	8
-0.011547	1	0	8
-0.013443	1	0	8
-0.073869	1	0	8
-0.0051106	1	1	1
-0.0039621	1	1	1
-0.0038979	1	1	1
-0.0038778	1	1	1
-0.0076825	1	1	1
-0.0092679	1	1	1
-0.0084089	1	1	1
0.0023243	1	1	1
-0.0014731	1	1	1
-0.0072795	1	1	1
-0.0055658	1	1	1
-0.0064199	1	1	1
-0.0065103	1	1	1
-0.003367	1	1	1
-0.0034155	1	1	1
-0.0083162	1	1	1
-0.006285	1	1	1
-0.011646	1	1	1
-0.0034002	1	1	1
0.0012908	1	1	1
-0.0069498	1	1	1
-0.0050839	1	1	1
-0.0048423	1	1	1
-0.0035623	1	1	1
-0.002362	1	1	1
-0.0015852	1	1	1
-0.0054061	1	1	1
-0.0089594	1	1	1
-0.0092976	1	1	1
-0.0089428	1	1	1
-0.0062587	1	1	1
-0.0078021	1	1	1
0.0013551	1	1	1
-0.0046498	1	1	1
-0.0055742	1	1	1
-0.00096908	1	1	1
-0.0025988	1	1	1
-0.0024142	1	1	1
-0.0026947	1	1	1
-0.0095924	1	1	1
-0.0060215	1	1	1
-0.0027645	1	1	1
-0.0026515	1	1	1
-0.0049165	1	1	1
-0.0056703	1	1	1
-0.0061972	1	1	1
-0.0040963	1	1	1
-0.0063297	1	1	1
-0.0074033	1	1	1
-0.0087016	1	1	1
-0.0010909	1	1	1
-0.0085147	1	1	1
-0.003377	1	1	1
-0.0063206	1	1	1
-0.0013927	1	1	1
-0.0068394	1	1	1
-0.0093886	1	1	1
-0.0063888	1	1	1
-0.010892	1	1	1
-0.0075381	1	1	1
-0.0048078	1	1	1
-0.0039992	1	1	1
-0.0044008	1	1	1
-0.0047366	1	1	1
-0.0017181	1	1	1
-0.0062208	1	1	1
-0.0047771	1	1	1
-0.0057337	1	1	1
-0.0053444	1	1	1
-0.0051929	1	1	1
-0.0067114	1	1	1
-0.0025791	1	1	1
-0.0047266	1	1	1
-0.0049868	1	1	1
-0.0054197	1	1	1
-0.0036328	1	1	1
-0.0062643	1	1	1
-0.0097965	1	1	1
-0.0099665	1	1	1
-0.0038216	1	1	1
-0.0063405	1	1	1
-0.010328	1	1	1
-0.010374	1	1	1
-0.0092429	1	1	1
-0.0054227	1	1	1
-0.0077436	1	1	1
-0.00014091	1	1	1
-0.0082464	1	1	1
-0.0061274	1	1	1
-0.0099361	1	1	1
-0.0093288	1	1	1
-0.0070439	1	1	1
-0.0026218	1	1	1
-0.0074795	1	1	1
-0.00065579	1	1	1
-0.0029044	1	1	1
-0.00967	1	1	1
-0.005049	1	1	1
-0.0081028	1	1	1
-9.629e-05	1	1	1
-0.0056807	1	1	1
-0.0062384	1	1	1
-0.0056412	1	1	1
-0.0060742	1	1	1
0.00028838	1	1	1
-0.0026791	1	1	1
-0.0056699	1	1	1
-0.0045133	1	1	1
-0.0060151	1	1	1
-0.0036779	1	1	1
-0.0055628	1	1	1
-0.0053097	1	1	1
-0.003278	1	1	1
-0.0054661	1	1	1
-0.0054746	1	1	1
-0.0010347	1	1	1
-0.0039027	1	1	1
0.00030017	1	1	1
-0.0038319	1	1	1
-0.0066554	1	1	1
-0.0071006	1	1	1
-0.0056015	1	1	1
-0.0033791	1	1	1
-0.0082284	1	1	1
-0.0053185	1	1	1
-0.0086018	1	1	1
-0.0070058	1	1	1
-0.0067273	1	1	1
-0.0038679	1	1	1
-0.0071761	1	1	1
-0.00083451	1	1	1
-0.010154	1	1	1
-0.0066592	1	1	1
-0.0036428	1	1	1
-0.0043035	1	1	1
-0.0049059	1	1	1
-0.0068933	1	1	1
-0.00092362	1	1	1
-0.0055055	1	1	1
-0.0032626	1	1	1
-0.0048127	1	1	1
-0.0066152	1	1	1
-0.0051443	1	1	1
-0.0031263	1	1	1
-0.004695	1	1	1
-0.0065729	1	1	1
-0.0047228	1	1	1
-0.0043937	1	1	1
-0.0080304	1	1	1
-0.0060323	1	1	1
-0.0035832	1	1	1
-0.00098432	1	1	1
-0.0005918	1	1	1
-0.0016878	1	1	1
-0.0058951	1	1	1
-0.0014436	1	1	1
-0.0042157	1	1	1
-0.0029911	1	1	1
-0.002279	1	1	1
-0.0012431	1	1	1
-0.0029526	1	1	1
-0.0039524	1	1	1
-0.0078044	1	1	1
-0.0055746	1	1	1
-0.0069039	1	1	1
-0.0040907	1	1	1
-0.011079	1	1	1
-0.010977	1	1	1
-0.0058076	1	1	1
-0.0047098	1	1	1
-0.0072203	1	1	1
-0.0050753	1	1	1
-0.0012196	1	1	1
-0.0033009	1	1	1
-0.0063366	1	1	1
-0.0041263	1	1	1
-0.0055433	1	1	1
-0.0046702	1	1	1
-0.0053751	1	1	1
-0.0012825	1	1	1
0.00026677	1	1	1
-0.0077129	1	1	1
-0.00076254	1	1	1
-0.0068398	1	1	1
-0.0065628	1	1	1
-0.004748	1	1	1
-0.0072385	1	1	1
-0.0025539	1	1	1
-0.0020983	1	1	1
-0.0055457	1	1	1
-0.0038749	1	1	1
-0.0029327	1	1	1
-0.0044665	1	1	1
-0.0073395	1	1	1
-0.0018233	1	1	1
-0.0015715	1	1	1
-0.0063271	1	1	1
-0.0073064	1	1	1
-0.0013033	1	1	1
-0.0026771	1	1	1
-0.005245	1	1	1
-0.0048644	1	1	1
-0.0044716	1	1	1
-0.0063912	1	1	1
-0.004555	1	1	1
-0.0013309	1	1	1
-0.0019406	1	1	1
-0.009886	1	1	1
-0.0049701	1	1	1
-0.008764	1	1	1
-0.0055114	1	1	1
-0.0024139	1	1	1
-0.0047273	1	1	1
-0.0049949	1	1	1
-0.0084464	1	1	1
-0.0071615	1	1	1
-0.0019639	1	1	1
-0.004886	1	1	1
-0.0058493	1	1	1
-0.0034789	1	1	1
-0.0011308	1	1	1
-0.0045492	1	1	1
-0.0039459	1	1	1
-0.0054807	1	1	1
-0.0025565	1	1	1
-0.0040017	1	1	1
-0.010559	1	1	1
-0.0047428	1	1	1
-0.0064996	1	1	1
-0.0061212	1	1	1
-0.0050037	1	1	1
-0.0046706	1	1	1
-0.0019241	1	1	1
-0.0029825	1	1	1
-0.0069189	1	1	1
-0.0091156	1	1	1
-0.0060252	1	1	1
-0.0071483	1	1	1
-0.005035	1	1	1
-0.0026609	1	1	1
-0.0036766	1	1	1
-0.00047057	1	1	1
-0.0018959	1	1	1
-0.0050653	1	1	1
0.0075166	1	1	2
0.015656	1	1	2
0.0038824	1	1	2
-0.00048747	1	1	2
0.035564	1	1	2
0.04248	1	1	2
0.011327	1	1	2
-0.0031853	1	1	2
0.038897	1	1	2
0.0015947	1	1	2
-0.0051684	1	1	2
0.0084644	1	1	2
-0.0043487	1	1	2
-0.0053655	1	1	2
-0.0015725	1	1	2
-0.0074157	1	1	2
0.014679	1	1	2
0.0090954	1	1	2
0.011839	1	1	2
0.012169	1	1	2
0.0026091	1	1	2
-0.002192	1	1	2
-0.017896	1	1	2
0.040937	1	1	2
-0.066266	1	1	2
0.0039009	1	1	2
0.0097772	1	1	2
-0.0016262	1	1	2
0.0028043	1	1	2
0.0037245	1	1	2
-0.0059912	1	1	2
-0.00022042	1	1	2
0.0011026	1	1	2
-0.0022564	1	1	2
-0.022205	1	1	2
0.0189	1	1	2
-0.0090171	1	1	2
-0.029341	1	1	2
0.0046598	1	1	2
0.018124	1	1	2
0.00052289	1	1	2
-0.012606	1	1	2
0.0013067	1	1	2
-0.094071	1	1	2
-0.023835	1	1	2
-0.0020235	1	1	2
0.0036884	1	1	2
0.013058	1	1	2
-0.0070772	1	1	2
-0.10355	1	1	2
-0.047773	1	1	2
-0.0030651	1	1	2
0.0065625	1	1	2
-0.0018326	1	1	2
-0.0041304	1	1	2
0.0086263	1	1	2
-0.021758	1	1	2
-0.0013643	1	1	2
-0.00016863	1	1	2
0.024801	1	1	2
-0.06608	1	1	2
-0.0006556	1	1	2
-0.0011707	1	1	2
0.020643	1	1	2
0.012272	1	1	2
0.028179	1	1	2
-0.0025122	1	1	2
-0.039415	1	1	2
0.00073778	1	1	2
0.017714	1	1	2
-0.12936	1	1	2
0.0059292	1	1	2
-0.003135	1	1	2
0.0082965	1	1	2
0.02329	1	1	2
-0.10238	1	1	2
0.0026795	1	1	2
0.041333	1	1	2
0.0055082	1	1	2
-0.002945	1	1	2
0.0063066	1	1	2
0.0019015	1	1	2
0.0014918	1	1	2
0.025912	1	1	2
-0.068627	1	1	2
-0.014702	1	1	2
0.036365	1	1	2
0.000558	1	1	2
0.015745	1	1	2
0.0024898	1	1	2
-0.01369	1	1	2
0.0044497	1	1	2
0.0053127	1	1	2
-0.010257	1	1	2
0.0042259	1	1	2
-0.002612	1	1	2
0.00049847	1	1	2
-0.012021	1	1	2
-0.0079381	1	1	2
-0.0036843	1	1	2
0.00088253	1	1	2
-0.022087	1	1	2
0.0039331	1	1	2
0.0013064	1	1	2
0.020333	1	1	2
0.0047746	1	1	2
0.0071422	1	1	2
0.0044786	1	1	2
-0.047918	1	1	2
-0.057016	1	1	2
-0.012029	1	1	2
-0.13899	1	1	2
-0.00011126	1	1	2
-0.0011947	1	1	2
0.0047104	1	1	2
0.0012023	1	1	2
-0.011714	1	1	2
-0.16362	1	1	2
-0.032632	1	1	2
0.0020271	1	1	2
0.00036693	1	1	2
-0.052106	1	1	3
-0.03335	1	1	3
-0.0042995	1	1	3
-0.086024	1	1	3
-0.0090876	1	1	3
-0.049723	1	1	3
-0.1061	1	1	3
-0.0050848	1	1	3
-0.02122	1	1	3
-0.0019628	1	1	3
-0.046808	1	1	3
-0.012772	1	1	3
-0.0044237	1	1	3
0.0001234	1	1	3
-0.0079684	1	1	3
-0.0021079	1	1	3
-0.013102	1	1	3
[truncated: 13,974 more rows]
