# Supplementary material for: Breakdown of local information processing may underlie isoflurane anesthesia effects
Source: PLoS Comput Biol. 2017 Jun 1;13(6):e1005511. doi: 10.1371/journal.pcbi.1005511 (PMC5453425; doi:10.1371/journal.pcbi.1005511)
Supplement: S1 Dataset — (ZIP) [file pcbi.1005511.s001.zip › ferret_1_te_ksg_raw_median.csv]

raw data	data z_scored	factor direction	factor anesthesia
-0.0092197	0.96223	1	1
0.0010123	1.4652	1	1
-0.016796	0.5898	1	1
-0.015496	0.65372	1	1
-0.018737	0.49443	1	1
-0.015214	0.66757	1	1
-0.020714	0.39726	1	1
-0.01308	0.7725	1	1
-0.0050572	1.1668	2	1
0.000558	1.4428	2	1
-0.029485	-0.0339	2	1
-0.025114	0.18095	2	1
-0.0072889	1.0571	2	1
-0.016982	0.58066	2	1
-0.018121	0.52471	2	1
-0.0066479	1.0886	2	1
-0.040794	-0.58978	1	2
-0.041452	-0.62213	1	2
-0.025995	0.13765	1	2
-0.020789	0.39356	1	2
-0.013595	0.74718	1	2
-0.022913	0.28913	2	2
-0.012053	0.82294	2	2
-0.017934	0.5339	2	2
-0.016975	0.58102	2	2
-0.013615	0.74617	2	2
-0.072272	-2.137	1	3
-0.098569	-3.4296	1	3
-0.050509	-1.0673	1	3
-0.073423	-2.1936	1	3
-0.062581	-1.6607	1	3
-0.044275	-0.76089	1	3
-0.041229	-0.61114	1	3
-0.053496	-1.2141	1	3
-0.037381	-0.42201	1	3
-0.053693	-1.2238	1	3
-0.030664	-0.091846	2	3
-0.029168	-0.018285	2	3
-0.018436	0.5092	2	3
-0.024449	0.21366	2	3
-0.033488	-0.23066	2	3
-0.035719	-0.34031	2	3
-0.036917	-0.39918	2	3
-0.027252	0.075866	2	3
-0.024336	0.21922	2	3
-0.034241	-0.26769	2	3
