# Supplementary material for: Breakdown of local information processing may underlie isoflurane anesthesia effects
Source: PLoS Comput Biol. 2017 Jun 1;13(6):e1005511. doi: 10.1371/journal.pcbi.1005511 (PMC5453425; doi:10.1371/journal.pcbi.1005511)
Supplement: S1 Dataset — (ZIP) [file pcbi.1005511.s001.zip › ferret_1_te_nsb_mean_param_interaction.csv]

mean FB	sem FB	mean FF	sem FF
0.040684	0.0086763	0.098774	0.027758
0.014186	0.05112	0.073303	0.030024
0.018477	0.0040598	0.022282	0.0021638
