# Supplementary material for: Breakdown of local information processing may underlie isoflurane anesthesia effects
Source: PLoS Comput Biol. 2017 Jun 1;13(6):e1005511. doi: 10.1371/journal.pcbi.1005511 (PMC5453425; doi:10.1371/journal.pcbi.1005511)
Supplement: S1 Dataset — (ZIP) [file pcbi.1005511.s001.zip › ferret_1_te_nsb_raw_mean.csv]

raw data	factor direction	factor anesthesia
0.020481	1	1
0.062699	1	1
0.041884	1	1
0.037672	1	1
0.12181	2	1
0.035036	2	1
0.16286	2	1
0.0754	2	1
-0.021782	1	2
-0.0035774	1	2
-0.077914	1	2
0.16002	1	2
0.093001	2	2
-0.0040164	2	2
0.064757	2	2
0.13947	2	2
0.024825	1	3
0.024622	1	3
0.0076649	1	3
0.016797	1	3
0.01878	2	3
0.022936	2	3
0.019266	2	3
0.028147	2	3
