# Supplementary material for: Breakdown of local information processing may underlie isoflurane anesthesia effects
Source: PLoS Comput Biol. 2017 Jun 1;13(6):e1005511. doi: 10.1371/journal.pcbi.1005511 (PMC5453425; doi:10.1371/journal.pcbi.1005511)
Supplement: S1 Dataset — (ZIP) [file pcbi.1005511.s001.zip › ferret_1_te_opt_u.csv]

awake FB	awake FF	iso 0.5 FB	iso 0.5 FF	iso 1.0 FB	iso 1.0 FF
3	12	5	5	9	2
10	3	5	10	3	4
5	5	6	4	6	5
7	8	2	5	4	2
2	7	4	5	4	4
8	8	NaN	NaN	1	5
4	9	NaN	NaN	4	3
5	5	NaN	NaN	4	4
NaN	NaN	NaN	NaN	4	5
NaN	NaN	NaN	NaN	3	4
NaN	NaN	NaN	NaN	NaN	NaN
NaN	NaN	NaN	NaN	NaN	NaN
