# Supplementary material for: Breakdown of local information processing may underlie isoflurane anesthesia effects
Source: PLoS Comput Biol. 2017 Jun 1;13(6):e1005511. doi: 10.1371/journal.pcbi.1005511 (PMC5453425; doi:10.1371/journal.pcbi.1005511)
Supplement: S1 Dataset — (ZIP) [file pcbi.1005511.s001.zip › ferret_2_ais_ksg_median_param_interaction.csv]

mean PFC	sem PFC	mean V1	sem V1
-1.9446	0.21183	-0.38277	0.090097
-0.85866	0.10913	0.21286	0.10015
0.59815	0.22477	0.81198	0.042763
