# Supplementary material for: Breakdown of local information processing may underlie isoflurane anesthesia effects
Source: PLoS Comput Biol. 2017 Jun 1;13(6):e1005511. doi: 10.1371/journal.pcbi.1005511 (PMC5453425; doi:10.1371/journal.pcbi.1005511)
Supplement: S1 Dataset — (ZIP) [file pcbi.1005511.s001.zip › ferret_2_ais_ksg_raw_lmm.csv]

raw data	factor anesthesia	factor direction	factor recording
1.2181	1	0	1
1.5509	1	0	1
1.2991	1	0	1
1.009	1	0	1
1.0194	1	0	1
1.1107	1	0	1
1.1159	1	0	1
1.2466	1	0	1
1.2581	1	0	1
1.3619	1	0	1
1.2981	1	0	1
1.1567	1	0	1
1.2854	1	0	1
1.0512	1	0	1
0.96833	1	0	1
1.119	1	0	1
1.3406	1	0	1
1.2799	1	0	1
1.3486	1	0	1
1.0515	1	0	1
1.3117	1	0	1
1.6167	1	0	1
1.0245	1	0	1
1.1261	1	0	1
1.0312	1	0	1
0.96275	1	0	1
1.3141	1	0	1
1.5148	1	0	1
1.0667	1	0	1
1.1291	1	0	1
1.1223	1	0	1
1.2635	1	0	1
1.2098	1	0	1
0.99628	1	0	1
1.0901	1	0	1
1.4484	1	0	1
1.3804	1	0	1
1.2154	1	0	1
1.2853	1	0	1
1.2222	1	0	1
1.1795	1	0	1
1.4237	1	0	1
1.6401	1	0	1
1.798	1	0	1
1.4033	1	0	1
1.8456	1	0	1
0.92693	1	0	1
1.3582	1	0	1
1.2305	1	0	1
1.1432	1	0	1
0.93257	1	0	1
1.09	1	0	1
1.0712	1	0	1
1.0813	1	0	1
1.4374	1	0	1
1.7282	1	0	1
1.078	1	0	1
1.5262	1	0	1
1.0499	1	0	1
1.5922	1	0	1
1.0949	1	0	1
1.2864	1	0	1
0.95663	1	0	1
1.1762	1	0	1
1.5033	1	0	1
1.5261	1	0	1
1.4533	1	0	1
2.0095	1	0	1
1.485	1	0	1
1.4191	1	0	1
1.1839	1	0	1
1.2393	1	0	1
1.2449	1	0	1
1.3984	1	0	1
0.85907	1	0	1
1.6821	1	0	1
1.1975	1	0	1
1.7567	1	0	1
1.9473	1	0	1
1.5533	1	0	1
1.5212	1	0	1
1.2064	1	0	1
1.5546	1	0	1
1.0791	1	0	1
1.3149	1	0	1
1.0888	1	0	1
1.3913	1	0	1
1.0059	1	0	1
1.2401	1	0	1
1.1448	1	0	1
1.2299	1	0	1
1.686	1	0	1
1.0992	1	0	1
1.5827	1	0	1
1.054	1	0	1
1.1931	1	0	1
0.77052	1	0	1
0.96268	1	0	1
1.282	1	0	1
1.4403	1	0	1
1.218	1	0	1
0.96643	1	0	1
1.3392	1	0	1
1.2716	1	0	1
1.0745	1	0	1
1.2275	1	0	1
0.82403	1	0	1
1.3583	1	0	1
1.4831	1	0	1
0.81555	1	0	1
1.254	1	0	1
1.482	1	0	1
1.5028	1	0	1
1.3765	1	0	1
1.7823	1	0	1
1.3305	1	0	1
1.2276	1	0	1
1.6524	1	0	1
1.7733	1	0	1
1.8811	1	0	1
1.3755	1	0	1
1.4181	1	0	1
1.3879	1	0	1
1.0919	1	0	1
1.5489	1	0	1
1.4526	1	0	1
0.78751	1	0	1
1.1402	1	0	1
1.148	1	0	1
1.0417	1	0	1
1.2061	1	0	1
1.1431	1	0	1
1.1427	1	0	1
0.81811	1	0	1
1.3393	1	0	1
1.0152	1	0	1
0.78915	1	0	1
1.2	1	0	1
1.4456	1	0	1
1.0068	1	0	1
1.3382	1	0	1
1.3187	1	0	1
1.1161	1	0	1
1.3735	1	0	1
1.1524	1	0	1
1.4886	1	0	1
1.6045	1	0	1
1.5766	1	0	1
1.7167	1	0	1
1.3725	1	0	1
1.2143	1	0	1
1.1799	1	0	1
1.5053	1	0	1
1.6846	1	0	1
1.8008	1	0	1
1.7258	1	0	1
2.0169	1	0	1
1.6674	1	0	1
1.6237	1	0	1
1.63	1	0	1
1.3063	1	0	1
1.0216	1	0	1
0.80796	1	0	1
1.3851	1	0	1
1.163	1	0	1
1.1451	1	0	1
1.1054	1	0	1
1.5932	1	0	1
1.1153	1	0	1
1.377	1	0	1
1.241	1	0	1
1.0529	1	0	1
1.4791	1	0	1
1.4116	1	0	1
1.2758	1	0	1
1.2471	1	0	1
1.6747	1	0	1
1.4304	1	0	1
0.93945	1	0	1
0.76205	1	0	1
1.6101	1	0	1
1.7232	1	0	1
1.0784	1	0	1
1.2196	1	0	1
1.1786	1	0	1
1.3481	1	0	1
1.1767	1	0	1
1.344	1	0	1
1.4954	1	0	1
1.4491	1	0	1
1.7387	1	0	1
1.2017	1	0	1
1.5381	1	0	1
1.9644	1	0	1
1.1537	1	0	1
1.0286	1	0	1
1.4366	1	0	1
0.94746	1	0	1
1.394	1	0	1
1.2648	1	0	1
1.0187	1	0	1
0.94159	1	0	2
0.88899	1	0	2
1.2125	1	0	2
1.6136	1	0	2
0.94384	1	0	2
1.4514	1	0	2
1.3323	1	0	2
1.1422	1	0	2
1.5278	1	0	2
1.7748	1	0	2
1.3284	1	0	2
1.0116	1	0	2
0.92772	1	0	2
1.0214	1	0	2
0.99118	1	0	2
0.98584	1	0	2
1.3299	1	0	2
1.3266	1	0	2
1.3158	1	0	2
1.1097	1	0	2
1.3984	1	0	2
0.93908	1	0	2
1.316	1	0	2
1.0626	1	0	2
1.099	1	0	2
1.4354	1	0	2
1.4001	1	0	2
1.4804	1	0	2
1.4385	1	0	2
1.7341	1	0	2
1.2079	1	0	2
1.6981	1	0	2
1.5484	1	0	2
1.6101	1	0	2
1.0806	1	0	2
0.98835	1	0	2
1.7419	1	0	2
1.5219	1	0	2
1.6951	1	0	2
1.5169	1	0	2
1.4254	1	0	2
1.2879	1	0	2
1.3663	1	0	2
1.6197	1	0	2
1.5896	1	0	2
1.7127	1	0	2
1.5693	1	0	2
1.25	1	0	2
1.7564	1	0	2
1.6481	1	0	2
1.1313	1	0	2
1.5276	1	0	2
1.5428	1	0	2
1.5582	1	0	2
1.1603	1	0	2
1.0843	1	0	2
1.3337	1	0	2
1.0799	1	0	2
1.0846	1	0	2
1.173	1	0	2
1.8286	1	0	2
1.3179	1	0	2
1.3813	1	0	2
1.0534	1	0	2
1.2023	1	0	2
1.2438	1	0	2
1.6091	1	0	2
1.5205	1	0	2
1.5579	1	0	2
1.3123	1	0	2
1.1186	1	0	2
1.4634	1	0	2
1.3606	1	0	2
1.2997	1	0	2
1.568	1	0	2
1.4514	1	0	2
1.3055	1	0	2
1.2065	1	0	2
1.3771	1	0	2
1.1622	1	0	2
1.3876	1	0	2
1.2243	1	0	2
1.6802	1	0	2
1.5316	1	0	2
1.8168	1	0	2
1.427	1	0	2
0.89321	1	0	2
1.0582	1	0	2
1.7894	1	0	2
1.0827	1	0	2
1.1083	1	0	2
1.1201	1	0	2
1.2715	1	0	2
1.6044	1	0	2
1.3469	1	0	2
1.4088	1	0	2
1.3793	1	0	2
1.1429	1	0	2
1.065	1	0	2
1.1906	1	0	2
1.4973	1	0	2
1.1448	1	0	2
1.1154	1	0	2
1.1705	1	0	2
1.805	1	0	2
1.5426	1	0	2
1.0518	1	0	2
1.5371	1	0	2
1.2446	1	0	2
1.4641	1	0	2
1.1999	1	0	2
0.88171	1	0	2
1.3764	1	0	2
1.4929	1	0	2
1.7097	1	0	2
1.246	1	0	2
1.1635	1	0	2
1.1871	1	0	2
1.229	1	0	2
0.94607	1	0	2
1.0155	1	0	2
1.3536	1	0	2
1.0313	1	0	2
1.3238	1	0	2
1.4884	1	0	2
1.3532	1	0	2
1.2289	1	0	2
1.4894	1	0	2
1.2586	1	0	2
1.3309	1	0	2
1.2862	1	0	2
1.4092	1	0	2
1.3011	1	0	2
1.4295	1	0	2
1.307	1	0	2
1.0971	1	0	2
1.356	1	0	2
1.129	1	0	2
1.1452	1	0	2
1.4688	1	0	2
1.1271	1	0	2
1.2895	1	0	2
1.5856	1	0	2
1.5939	1	0	2
1.2509	1	0	2
1.0356	1	0	2
1.2493	1	0	2
1.0891	1	0	2
1.1129	1	0	2
1.4531	1	0	2
1.5237	1	0	2
1.0042	1	0	2
1.3026	1	0	2
1.3074	1	0	2
0.94009	1	0	2
0.9756	1	0	2
1.0528	1	0	2
1.1815	1	0	2
1.5765	1	0	2
1.4366	1	0	2
1.3355	1	0	2
1.3642	1	0	2
1.6945	1	0	2
1.159	1	0	2
1.112	1	0	2
1.5956	1	0	2
1.4622	1	0	2
1.5931	1	0	2
1.1556	1	0	2
1.3977	1	0	2
1.6714	1	0	2
1.1775	1	0	2
1.2735	1	0	2
1.4587	1	0	2
1.5782	1	0	2
1.3094	1	0	2
1.1295	1	0	2
1.2674	1	0	2
1.1065	1	0	2
1.2273	1	0	2
1.1659	1	0	2
1.2072	1	0	2
1.273	1	0	2
1.6356	1	0	2
1.4134	1	0	2
1.1617	1	0	2
1.302	1	0	2
1.3379	1	0	2
1.3494	1	0	2
0.99696	1	0	2
1.0769	1	0	2
1.3643	1	0	2
1.7294	1	0	2
1.1729	1	0	2
1.7286	1	0	2
1.2848	1	0	2
1.1098	1	0	2
1.1967	1	0	2
1.5882	1	0	2
1.1648	1	0	2
1.1506	1	0	2
1.3466	1	0	2
1.4862	1	0	2
1.1812	1	0	2
1.5879	1	0	2
1.4112	1	0	2
1.1351	1	0	2
1.5359	1	0	2
1.4569	1	0	2
1.786	1	0	2
1.5774	1	0	2
1.49	1	0	2
1.4428	1	0	2
1.393	1	0	2
1.5274	1	0	2
1.2235	1	0	2
1.3862	1	0	2
1.2033	1	0	2
1.523	1	0	2
1.2174	1	0	2
1.3629	1	0	2
0.98443	1	0	2
1.5248	1	0	2
1.2079	1	0	2
1.256	1	0	2
1.7889	1	0	2
1.5255	1	0	2
1.0327	1	0	2
1.3267	1	0	2
1.3976	1	0	2
0.88292	1	0	2
1.5992	1	0	2
0.91195	1	0	2
1.2357	1	0	2
0.89252	1	0	2
1.1734	1	0	2
1.7409	1	0	2
1.0834	1	0	2
1.1637	1	0	2
1.6601	1	0	2
1.3623	1	0	2
1.4086	1	0	2
1.2787	1	0	2
1.3668	1	0	2
1.1333	1	0	2
1.2976	1	0	2
1.4546	1	0	2
1.3779	1	0	2
1.057	1	0	2
1.4798	1	0	2
1.8537	1	0	2
1.0674	1	0	2
1.4562	1	0	2
1.4201	1	0	2
1.3107	1	0	2
1.0197	1	0	2
1.4378	1	0	2
1.1941	1	0	2
1.1633	1	0	2
1.1947	1	0	2
1.262	1	0	2
1.7564	1	0	2
1.671	1	0	2
1.3252	1	0	2
1.4964	1	0	2
1.1088	1	0	2
1.0815	1	0	2
1.4274	1	0	2
1.1369	1	0	2
1.3026	1	0	2
1.1711	1	0	2
1.1049	1	0	2
1.2128	1	0	2
1.6101	1	0	2
1.6927	1	0	2
0.90226	1	0	2
1.2898	1	0	2
1.3667	1	0	2
1.1997	1	0	2
1.1339	1	0	2
0.97894	1	0	2
1.1649	1	0	2
1.4544	1	0	2
0.97325	1	0	2
1.3365	1	0	2
1.1725	1	0	2
1.2211	1	0	2
1.2275	1	0	2
1.37	1	0	2
1.0684	1	0	2
1.0137	1	0	2
1.2251	1	0	2
1.1859	1	0	2
1.2132	1	0	2
1.0254	1	0	2
1.0478	1	0	2
1.0927	1	0	2
1.2403	1	0	2
1.4688	1	0	2
0.94545	1	0	2
1.0281	1	0	2
1.1009	1	0	2
1.6625	1	0	2
1.3136	1	0	2
0.97068	1	0	2
1.2951	1	0	2
1.22	1	0	2
1.3719	1	0	2
1.5726	1	0	2
1.6072	1	0	2
0.9864	1	0	2
1.1387	1	0	2
1.4016	1	0	2
1.3532	1	0	2
1.0936	1	0	2
1.7393	1	0	2
1.5263	1	0	2
1.1811	1	0	2
0.94269	1	0	2
1.6341	1	0	2
1.0299	1	0	2
1.3486	1	0	2
1.1392	1	0	2
1.2203	1	0	2
1.3282	1	0	2
0.82379	1	0	2
1.3422	1	0	2
1.3309	1	0	2
1.3124	1	0	2
1.1951	1	0	2
1.045	1	0	2
1.2529	1	0	2
1.0481	1	0	2
1.266	1	0	2
0.98873	1	0	2
1.1182	1	0	2
1.0751	1	0	2
1.3173	1	0	2
1.4441	1	0	2
1.3699	1	0	2
1.2084	1	0	2
1.0948	1	0	2
1.2607	1	0	2
1.1147	1	0	2
1.3912	1	0	2
1.2326	1	0	2
1.1054	1	0	2
1.0708	1	0	2
0.98427	1	0	2
1.0278	1	0	2
1.2365	1	0	2
1.1537	1	0	2
1.3637	1	0	2
1.605	1	0	2
1.1027	1	0	2
1.0598	1	0	2
1.0314	1	0	2
1.3163	1	0	2
1.3386	1	0	2
1.1187	1	0	2
0.88223	1	0	2
0.94703	1	0	2
1.5684	1	0	2
0.94189	1	0	2
1.2418	1	0	2
1.5258	1	0	2
1.1649	1	0	2
0.80471	1	0	2
1.0592	1	0	2
1.1671	1	0	2
1.5122	1	0	2
0.87939	1	0	2
1.6308	1	0	2
1.2959	1	0	2
1.3431	1	0	2
1.7775	1	0	2
1.7921	1	0	2
1.3477	1	0	2
0.94085	1	0	2
0.89044	1	0	2
1.1206	1	0	2
1.2688	1	0	2
1.1059	1	0	2
1.3447	1	0	2
0.83418	1	0	2
1.3061	1	0	2
1.4128	1	0	2
1.5179	1	0	2
1.3731	1	0	2
1.0421	1	0	2
1.3502	1	0	2
1.2564	1	0	2
1.2568	1	0	2
1.1571	1	0	2
0.89974	1	0	2
0.96611	1	0	2
0.99323	1	0	2
1.3713	1	0	2
1.7585	1	0	2
1.22	1	0	2
1.3494	1	0	2
1.3518	1	0	2
1.2724	1	0	2
1.4016	1	0	2
1.6248	1	0	2
1.286	1	0	2
1.557	1	0	2
1.4372	1	0	2
1.3802	1	0	2
1.3402	1	0	2
1.3388	1	0	2
1.5975	1	0	2
1.3026	1	0	2
1.2713	1	0	2
1.9082	1	0	2
1.1624	1	0	2
1.1192	1	0	2
1.4061	1	0	2
1.4183	1	0	2
1.6238	1	0	2
1.9677	1	0	2
1.5525	1	0	2
1.6294	1	0	2
0.72585	1	0	2
1.4704	1	0	2
1.1181	1	0	2
0.89289	1	0	2
1.0968	1	0	2
0.9163	1	0	2
1.78	1	0	2
1.5654	1	0	2
0.88421	1	0	3
1.1005	1	0	3
0.87295	1	0	3
0.69302	1	0	3
0.85583	1	0	3
0.61895	1	0	3
0.73735	1	0	3
0.61967	1	0	3
0.5427	1	0	3
0.70515	1	0	3
0.87137	1	0	3
1.1559	1	0	3
0.53997	1	0	3
0.70691	1	0	3
0.89195	1	0	3
0.80498	1	0	3
0.81457	1	0	3
0.83406	1	0	3
0.66174	1	0	3
0.7042	1	0	3
0.83312	1	0	3
0.76609	1	0	3
0.62919	1	0	3
0.79356	1	0	3
0.63197	1	0	3
0.66601	1	0	3
0.8444	1	0	3
0.69264	1	0	3
0.82849	1	0	3
0.71856	1	0	3
0.75795	1	0	3
0.71751	1	0	3
0.69437	1	0	3
0.8859	1	0	3
0.77247	1	0	3
0.69701	1	0	3
0.64399	1	0	3
0.67434	1	0	3
0.90243	1	0	3
0.82243	1	0	3
0.81039	1	0	3
0.65727	1	0	3
0.70382	1	0	3
0.71224	1	0	3
0.73967	1	0	3
0.79628	1	0	3
0.68572	1	0	3
0.62453	1	0	3
0.70632	1	0	3
0.72881	1	0	3
0.71575	1	0	3
0.73736	1	0	3
0.70071	1	0	3
0.84365	1	0	3
0.78151	1	0	3
0.80846	1	0	3
0.78024	1	0	3
0.85703	1	0	3
0.62621	1	0	3
0.83033	1	0	3
0.71816	1	0	3
0.64515	1	0	3
0.72435	1	0	3
0.75265	1	0	3
0.70427	1	0	3
0.83999	1	0	3
0.79131	1	0	3
0.65234	1	0	3
0.67137	1	0	3
0.78014	1	0	3
0.73726	1	0	3
0.74594	1	0	3
0.67491	1	0	3
0.69737	1	0	3
0.86609	1	0	3
0.76986	1	0	3
0.69871	1	0	3
0.80204	1	0	3
0.78134	1	0	3
0.7891	1	0	3
0.74831	1	0	3
0.78022	1	0	3
1.1346	1	0	3
0.98093	1	0	3
0.87039	1	0	3
0.81038	1	0	3
1.0892	1	0	3
0.91261	1	0	3
0.87009	1	0	3
0.91724	1	0	3
1.0252	1	0	3
0.75633	1	0	3
0.72897	1	0	3
0.78489	1	0	3
0.80369	1	0	3
0.81644	1	0	3
0.90026	1	0	3
0.86929	1	0	3
0.80181	1	0	3
1.0237	1	0	3
0.88767	1	0	3
0.97534	1	0	3
0.787	1	0	3
0.81305	1	0	3
0.84917	1	0	3
0.89395	1	0	3
0.86847	1	0	3
0.76221	1	0	3
1.1507	1	0	3
1.0658	1	0	3
0.7082	1	0	3
0.7406	1	0	3
0.92014	1	0	3
0.89993	1	0	3
0.70606	1	0	3
0.68864	1	0	3
1.0062	1	0	3
0.55311	1	0	3
0.81253	1	0	3
0.56065	1	0	3
1.3052	1	0	3
0.91988	1	0	3
0.66798	1	0	3
0.67236	1	0	3
0.66655	1	0	3
0.74105	1	0	3
0.71743	1	0	3
0.75763	1	0	3
0.74683	1	0	3
0.75828	1	0	3
0.91279	1	0	3
0.82459	1	0	3
0.92788	1	0	3
0.88532	1	0	3
0.76812	1	0	3
0.84302	1	0	3
0.78141	1	0	3
0.72922	1	0	3
1.0322	1	0	3
0.80406	1	0	3
0.6953	1	0	3
0.73925	1	0	3
0.80879	1	0	3
0.75343	1	0	3
0.95564	1	0	3
0.68266	1	0	3
0.84836	1	0	3
0.79407	1	0	3
0.69674	1	0	3
0.60765	1	0	3
0.63383	1	0	3
0.78015	1	0	3
0.92617	1	0	3
0.85443	1	0	3
0.66354	1	0	3
0.88549	1	0	3
0.73787	1	0	3
0.77836	1	0	3
0.84349	1	0	3
0.79578	1	0	3
0.77841	1	0	3
0.72553	1	0	3
0.69809	1	0	3
0.77663	1	0	3
0.88808	1	0	3
0.72792	1	0	3
0.78907	1	0	3
0.75695	1	0	3
0.75694	1	0	3
0.79606	1	0	3
0.76797	1	0	3
0.80051	1	0	3
0.87662	1	0	3
0.71562	1	0	3
0.70978	1	0	3
0.69621	1	0	3
0.69394	1	0	3
0.69839	1	0	3
0.8579	1	0	3
0.75506	1	0	3
0.74197	1	0	3
0.80095	1	0	3
0.83545	1	0	3
0.94357	1	0	3
0.72462	1	0	3
0.94971	1	0	3
0.79904	1	0	3
0.77626	1	0	3
0.94605	1	0	3
0.80691	1	0	3
0.79209	1	0	3
0.96448	1	0	3
0.828	1	0	3
0.8307	1	0	3
0.78315	1	0	3
0.85275	1	0	3
0.76209	1	0	3
0.80349	1	0	3
0.68915	1	0	3
0.90644	1	0	3
0.90303	1	0	3
0.85738	1	0	3
0.9157	1	0	3
0.8873	1	0	3
0.97289	1	0	3
0.95266	1	0	3
0.68403	1	0	3
0.65246	1	0	3
0.67089	1	0	3
0.71454	1	0	3
0.64698	1	0	3
0.8484	1	0	3
0.92858	1	0	3
0.76613	1	0	3
0.777	1	0	3
0.7668	1	0	3
0.91162	1	0	3
0.88845	1	0	3
0.74963	1	0	3
0.69504	1	0	3
0.75743	1	0	3
0.844	1	0	3
0.77293	1	0	3
0.83424	1	0	3
0.76144	1	0	3
0.85435	1	0	3
0.97197	1	0	3
0.76446	1	0	3
0.7618	1	0	3
0.76586	1	0	3
0.82729	1	0	3
0.86626	1	0	3
0.83453	1	0	3
0.95966	1	0	3
0.9126	1	0	3
0.91047	1	0	3
1.025	1	0	3
1.1077	1	0	3
1.6378	1	0	3
1.155	1	0	3
0.76614	1	0	3
0.83214	1	0	3
0.89539	1	0	3
1.0865	1	0	3
0.68529	1	0	3
0.74319	1	0	3
1.1384	1	0	3
1.14	1	0	3
1.0769	1	0	3
0.61728	1	0	3
0.74994	1	0	3
0.89921	1	0	3
1.2098	1	0	3
0.95676	1	0	3
1.0578	1	0	3
1.1867	1	0	3
0.94577	1	0	3
0.70653	1	0	3
0.77856	1	0	3
0.68803	1	0	3
0.77482	1	0	3
0.77866	1	0	3
0.73692	1	0	3
1.0855	1	0	3
0.85094	1	0	3
0.88405	1	0	3
1.489	1	0	3
0.88958	1	0	3
0.77568	1	0	3
1.0257	1	0	3
0.84764	1	0	3
1.0432	1	0	3
0.96398	1	0	3
1.1744	1	0	3
0.632	1	0	3
0.6909	1	0	3
0.67523	1	0	3
0.82001	1	0	3
0.96681	1	0	3
0.89012	1	0	3
0.69774	1	0	3
0.72979	1	0	3
0.78194	1	0	3
0.73302	1	0	3
0.58739	1	0	3
0.85839	1	0	3
0.86835	1	0	3
0.95324	1	0	3
1.0312	1	0	3
0.82036	1	0	3
0.77011	1	0	3
1.1137	1	0	3
1.2827	1	0	3
0.90766	1	0	3
0.53757	1	0	3
0.60013	1	0	3
0.66566	1	0	3
0.67731	1	0	3
1.0214	1	0	3
0.8737	1	0	3
0.69666	1	0	3
0.8269	1	0	3
0.59614	1	0	3
0.65191	1	0	3
0.96907	1	0	3
0.62816	1	0	3
0.6874	1	0	3
0.71397	1	0	3
0.67099	1	0	3
0.73455	1	0	3
0.84635	1	0	3
0.67146	1	0	3
0.9447	1	0	3
0.99438	1	0	3
0.7242	1	0	3
1.1892	1	0	3
1.1386	1	0	3
0.85259	1	0	3
1.0392	1	0	3
0.74297	1	0	3
0.76797	1	0	3
0.75159	1	0	3
0.73354	1	0	3
1.583	1	0	3
0.97906	1	0	3
0.70655	1	0	3
0.67422	1	0	3
0.74515	1	0	3
0.64541	1	0	3
0.54836	1	0	3
0.79029	1	0	3
0.74664	1	0	3
0.7711	1	0	3
0.71042	1	0	3
0.76011	1	0	3
0.99272	1	0	3
0.97806	1	0	3
1.2097	1	0	4
1.3628	1	0	4
1.1685	1	0	4
1.6501	1	0	4
1.1051	1	0	4
1.102	1	0	4
0.95454	1	0	4
0.73903	1	0	4
1.2209	1	0	4
0.99772	1	0	4
1.2464	1	0	4
1.1914	1	0	4
1.4617	1	0	4
0.94414	1	0	4
0.85676	1	0	4
1.3192	1	0	4
0.92406	1	0	4
0.7707	1	0	4
1.2773	1	0	4
1.3638	1	0	4
1.5197	1	0	4
1.6016	1	0	4
1.0205	1	0	4
1.1297	1	0	4
1.4205	1	0	4
0.90829	1	0	4
1.5474	1	0	4
1.3821	1	0	4
1.7048	1	0	4
1.4178	1	0	4
1.0089	1	0	4
1.8347	1	0	4
1.6887	1	0	4
1.7321	1	0	4
0.8967	1	0	4
0.84582	1	0	4
1.2796	1	0	4
0.94875	1	0	4
1.0051	1	0	4
1.063	1	0	4
0.79582	1	0	4
0.76679	1	0	4
1.0168	1	0	4
1.034	1	0	4
0.9466	1	0	4
1.0305	1	0	4
1.4099	1	0	4
1.0556	1	0	4
0.83301	1	0	4
1.097	1	0	4
1.6001	1	0	4
1.2738	1	0	4
0.56075	1	0	4
0.99288	1	0	4
1.1615	1	0	4
1.5343	1	0	4
0.89589	1	0	4
0.96011	1	0	4
1.1487	1	0	4
0.97714	1	0	4
1.27	1	0	4
1.3101	1	0	4
1.4388	1	0	4
1.6326	1	0	4
1.2089	1	0	4
1.2114	1	0	4
1.1059	1	0	4
1.1489	1	0	4
0.78614	1	0	4
0.63245	1	0	4
0.73745	1	0	4
1.1712	1	0	4
1.2641	1	0	4
0.8123	1	0	4
1.0763	1	0	4
0.90477	1	0	4
0.8582	1	0	4
0.9342	1	0	4
1.314	1	0	4
1.3324	1	0	4
0.97707	1	0	4
1.2657	1	0	4
1.0187	1	0	4
0.87047	1	0	4
1.0653	1	0	4
1.1634	1	0	4
0.99191	1	0	4
0.91573	1	0	4
1.2199	1	0	4
1.1533	1	0	4
0.98738	1	0	4
1.378	1	0	4
0.97842	1	0	4
1.177	1	0	4
1.2162	1	0	4
1.1462	1	0	4
1.3156	1	0	4
1.1987	1	0	4
0.99348	1	0	4
1.1074	1	0	4
1.2202	1	0	4
1.1833	1	0	4
1.6454	1	0	4
1.8528	1	0	4
1.5823	1	0	4
1.4501	1	0	4
1.359	1	0	4
1.6126	1	0	4
1.8499	1	0	4
1.0796	1	0	4
1.7935	1	0	4
1.529	1	0	4
1.6096	1	0	4
0.94155	1	0	4
1.1196	1	0	4
1.5307	1	0	4
1.0417	1	0	4
1.1965	1	0	4
0.89699	1	0	4
0.96766	1	0	4
1.1183	1	0	4
1.3366	1	0	4
1.4291	1	0	4
1.0896	1	0	4
1.4394	1	0	4
1.402	1	0	4
1.0526	1	0	4
1.3561	1	0	4
1.1786	1	0	4
1.0648	1	0	4
0.81231	1	0	4
1.5327	1	0	4
1.2608	1	0	4
1.5574	1	0	4
0.84193	1	0	4
1.0252	1	0	4
1.1772	1	0	4
1.849	1	0	4
0.97591	1	0	4
1.2926	1	0	4
1.191	1	0	4
1.4549	1	0	4
1.0673	1	0	4
1.5616	1	0	4
0.96907	1	0	4
1.1418	1	0	4
1.4393	1	0	4
1.1842	1	0	4
1.1565	1	0	4
1.5525	1	0	4
1.008	1	0	4
1.5487	1	0	4
1.3985	1	0	4
1.5434	1	0	4
1.7272	1	0	4
0.97862	1	0	4
1.2969	1	0	4
1.3433	1	0	4
1.0546	1	0	4
0.74843	1	0	4
1.0735	1	0	4
0.97559	1	0	4
1.0969	1	0	4
1.0931	1	0	4
1.251	1	0	4
1.2134	1	0	4
1.0348	1	0	4
0.89424	1	0	4
0.81232	1	0	4
0.74451	1	0	4
0.94883	1	0	4
1.6921	1	0	4
0.81146	1	0	4
1.2267	1	0	4
1.2399	1	0	4
1.0019	1	0	4
1.1013	1	0	4
0.78764	1	0	4
1.1952	1	0	4
1.1096	1	0	4
1.4036	1	0	4
0.90932	1	0	4
0.93013	1	0	4
1.0206	1	0	4
1.1151	1	0	4
1.2801	1	0	4
1.0902	1	0	4
1.0179	1	0	4
1.2106	1	0	4
1.4813	1	0	4
0.66201	1	0	4
1.4478	1	0	4
1.3767	1	0	4
1.0036	1	0	4
1.0155	1	0	5
0.99739	1	0	5
0.99938	1	0	5
0.60969	1	0	5
0.64378	1	0	5
0.87329	1	0	5
0.7119	1	0	5
0.72846	1	0	5
1.2529	1	0	5
0.56457	1	0	5
0.70817	1	0	5
0.94197	1	0	5
1.1793	1	0	5
0.82358	1	0	5
0.98598	1	0	5
0.91438	1	0	5
1.3856	1	0	5
0.95518	1	0	5
0.85335	1	0	5
0.69684	1	0	5
0.77895	1	0	5
0.76755	1	0	5
0.68942	1	0	5
1.0742	1	0	5
0.53317	1	0	5
0.75106	1	0	5
0.70052	1	0	5
1.141	1	0	5
1.2293	1	0	5
1.2602	1	0	5
0.9652	1	0	5
1.0057	1	0	5
0.6919	1	0	5
1.5716	1	0	5
1.2898	1	0	5
0.77652	1	0	5
0.90038	1	0	5
0.65362	1	0	5
0.90027	1	0	5
0.61389	1	0	5
0.63661	1	0	5
0.60058	1	0	5
0.77238	1	0	5
1.1139	1	0	5
0.72948	1	0	5
0.6148	1	0	5
0.7015	1	0	5
0.78471	1	0	5
0.67528	1	0	5
0.70549	1	0	5
0.99553	1	0	5
0.72095	1	0	5
0.61852	1	0	5
0.6251	1	0	5
0.75054	1	0	5
0.59165	1	0	5
0.73854	1	0	5
0.79332	1	0	5
0.68391	1	0	5
0.64076	1	0	5
0.76761	1	0	5
0.71791	1	0	5
0.57194	1	0	5
0.60503	1	0	5
0.66031	1	0	5
0.83553	1	0	5
0.83586	1	0	5
0.85078	1	0	5
0.96976	1	0	5
0.76232	1	0	5
0.9038	1	0	5
1.0083	1	0	5
0.78575	1	0	5
0.68726	1	0	5
0.65802	1	0	5
0.81896	1	0	5
1.0249	1	0	5
0.77579	1	0	5
0.64994	1	0	5
0.99932	1	0	5
0.89086	1	0	5
1.0319	1	0	5
1.0877	1	0	5
1.1484	1	0	5
1.3557	1	0	5
1.1531	1	0	5
1.1237	1	0	5
1.2926	1	0	5
1.2429	1	0	5
0.94101	1	0	5
1.0042	1	0	5
0.63141	1	0	5
0.94951	1	0	5
0.69497	1	0	5
0.93374	1	0	5
1.0215	1	0	5
0.94921	1	0	5
0.77367	1	0	5
0.76822	1	0	5
0.83311	1	0	5
1.2478	1	0	5
1.1943	1	0	5
0.82133	1	0	5
0.62208	1	0	5
0.60297	1	0	5
0.81546	1	0	5
0.87345	1	0	5
0.86552	1	0	5
0.59945	1	0	5
0.63831	1	0	5
1.122	1	0	5
0.76849	1	0	5
0.98109	1	0	5
0.63707	1	0	5
0.71061	1	0	5
0.67146	1	0	5
0.72823	1	0	5
0.70233	1	0	5
0.95046	1	0	5
1.1098	1	0	5
1.178	1	0	5
0.90901	1	0	5
0.81577	1	0	5
0.92908	1	0	5
0.99155	1	0	5
1.1212	1	0	5
1.0003	1	0	5
0.80894	1	0	5
0.63875	1	0	5
0.69728	1	0	5
0.9878	1	0	5
0.97751	1	0	5
1.1496	1	0	5
1.2018	1	0	5
0.72048	1	0	5
1.042	1	0	5
1.1873	1	0	5
0.76865	1	0	5
1.1805	1	0	5
2.0125	1	0	5
0.83107	1	0	5
0.86482	1	0	5
0.71369	1	0	5
0.69157	1	0	5
0.69265	1	0	5
0.77042	1	0	5
1.3254	1	0	5
0.82514	1	0	5
0.77671	1	0	5
1.0694	1	0	5
0.94816	1	0	5
0.5452	1	0	5
0.71251	1	0	5
1.3722	1	1	1
1.8721	1	1	1
1.8938	1	1	1
2.0383	1	1	1
1.8959	1	1	1
1.973	1	1	1
1.9994	1	1	1
1.8568	1	1	1
2.1679	1	1	1
2.1373	1	1	1
1.8553	1	1	1
1.8397	1	1	1
2.1718	1	1	1
1.8875	1	1	1
1.4287	1	1	1
1.8886	1	1	1
1.2403	1	1	1
1.5747	1	1	1
1.6938	1	1	1
1.8462	1	1	1
1.7639	1	1	1
2.3203	1	1	1
1.7926	1	1	1
1.824	1	1	1
1.619	1	1	1
1.5833	1	1	1
2.2554	1	1	1
1.7454	1	1	1
1.8904	1	1	1
1.7258	1	1	1
1.7758	1	1	1
1.9896	1	1	1
1.9008	1	1	1
1.8728	1	1	1
1.6675	1	1	1
1.223	1	1	1
2.1147	1	1	1
1.9923	1	1	1
1.8933	1	1	1
1.8623	1	1	1
1.4778	1	1	1
1.5785	1	1	1
2.0382	1	1	1
1.9726	1	1	1
2.2008	1	1	1
2.1855	1	1	1
1.9095	1	1	1
1.9061	1	1	1
2.1845	1	1	1
2.0792	1	1	1
1.951	1	1	1
1.5529	1	1	1
1.22	1	1	1
2.0701	1	1	1
2.0764	1	1	1
1.9207	1	1	1
1.8073	1	1	1
1.6039	1	1	1
1.4816	1	1	1
1.6578	1	1	1
2.0083	1	1	1
1.9357	1	1	1
1.5233	1	1	1
1.5276	1	1	1
1.4565	1	1	1
1.9583	1	1	1
1.8356	1	1	1
1.5169	1	1	1
1.7192	1	1	1
1.1495	1	1	1
1.128	1	1	1
1.2927	1	1	1
1.3177	1	1	1
1.4454	1	1	1
1.3466	1	1	1
1.246	1	1	1
1.4247	1	1	1
1.4646	1	1	1
1.2665	1	1	1
1.2171	1	1	1
1.54	1	1	1
1.6741	1	1	1
1.5388	1	1	1
1.5537	1	1	1
1.4578	1	1	1
1.5707	1	1	1
1.3606	1	1	1
1.4869	1	1	1
1.3936	1	1	1
1.4599	1	1	1
1.6236	1	1	1
1.1367	1	1	1
0.92071	1	1	1
0.99884	1	1	1
1.1216	1	1	1
0.97182	1	1	1
0.91021	1	1	1
1.1619	1	1	1
1.3496	1	1	1
1.7647	1	1	1
1.3831	1	1	1
1.3858	1	1	1
1.49	1	1	1
1.7076	1	1	1
1.6924	1	1	1
0.72055	1	1	1
1.3356	1	1	1
0.94176	1	1	1
1.2698	1	1	1
1.1917	1	1	1
1.1855	1	1	1
1.5633	1	1	1
1.8188	1	1	1
1.44	1	1	1
1.1716	1	1	1
1.8428	1	1	1
1.2826	1	1	1
1.8005	1	1	1
1.5073	1	1	1
1.4444	1	1	1
1.3622	1	1	1
1.5119	1	1	1
1.6183	1	1	1
1.4448	1	1	1
1.5257	1	1	1
1.3746	1	1	1
1.8186	1	1	1
1.7136	1	1	1
1.5653	1	1	1
1.8434	1	1	1
1.6112	1	1	1
1.2034	1	1	1
1.7088	1	1	1
1.8014	1	1	1
1.7662	1	1	1
1.8768	1	1	1
1.914	1	1	1
1.9958	1	1	1
2.0399	1	1	1
1.8705	1	1	1
1.7116	1	1	1
1.8899	1	1	1
1.8321	1	1	1
1.7642	1	1	1
1.9303	1	1	1
1.6865	1	1	1
1.7173	1	1	1
1.3888	1	1	1
1.6751	1	1	1
1.3922	1	1	1
1.532	1	1	1
1.3995	1	1	1
1.597	1	1	1
1.3538	1	1	1
1.3768	1	1	1
1.2892	1	1	1
1.3623	1	1	1
1.2344	1	1	1
1.1823	1	1	1
2.1128	1	1	1
2.1433	1	1	1
1.597	1	1	1
1.9438	1	1	1
2.1565	1	1	1
2.5303	1	1	1
2.1876	1	1	1
2.1141	1	1	1
2.1873	1	1	1
1.8874	1	1	1
2.1107	1	1	1
2.0975	1	1	1
2.193	1	1	1
2.1433	1	1	1
1.5364	1	1	1
2.1024	1	1	1
1.9889	1	1	1
1.6454	1	1	1
1.7986	1	1	1
2.0791	1	1	1
1.7317	1	1	1
1.8969	1	1	1
2.0553	1	1	1
1.9457	1	1	1
1.3973	1	1	1
1.1829	1	1	1
2.2964	1	1	1
1.8155	1	1	1
1.5225	1	1	1
2.2332	1	1	1
1.8747	1	1	1
2.0273	1	1	1
1.9933	1	1	1
2.0765	1	1	1
2.1235	1	1	1
2.053	1	1	1
1.8992	1	1	1
0.86832	1	1	2
0.85631	1	1	2
1.2999	1	1	2
1.7361	1	1	2
1.434	1	1	2
1.6196	1	1	2
1.8383	1	1	2
1.319	1	1	2
1.1262	1	1	2
1.7933	1	1	2
1.0804	1	1	2
1.0648	1	1	2
0.83682	1	1	2
1.3256	1	1	2
1.7297	1	1	2
2.09	1	1	2
1.8115	1	1	2
1.4999	1	1	2
1.2885	1	1	2
0.89488	1	1	2
1.2666	1	1	2
1.5083	1	1	2
1.7905	1	1	2
1.8642	1	1	2
1.8691	1	1	2
1.6646	1	1	2
1.9484	1	1	2
1.5111	1	1	2
1.1081	1	1	2
1.5944	1	1	2
1.7196	1	1	2
1.8449	1	1	2
1.9101	1	1	2
2.2315	1	1	2
2.0768	1	1	2
1.636	1	1	2
2.2191	1	1	2
1.8569	1	1	2
1.5813	1	1	2
2.198	1	1	2
2.2586	1	1	2
2.2721	1	1	2
2.1937	1	1	2
2.2003	1	1	2
2.3664	1	1	2
2.2029	1	1	2
1.9868	1	1	2
2.0287	1	1	2
2.237	1	1	2
2.0531	1	1	2
2.1602	1	1	2
2.185	1	1	2
2.2494	1	1	2
2.1973	1	1	2
2.2872	1	1	2
2.1045	1	1	2
2.2845	1	1	2
1.6547	1	1	2
2.0472	1	1	2
2.1988	1	1	2
2.3583	1	1	2
2.4366	1	1	2
2.3819	1	1	2
2.2675	1	1	2
2.3206	1	1	2
2.528	1	1	2
2.343	1	1	2
2.4016	1	1	2
2.5378	1	1	2
2.2232	1	1	2
2.362	1	1	2
2.3287	1	1	2
2.4917	1	1	2
2.4599	1	1	2
2.4519	1	1	2
2.1801	1	1	2
2.3871	1	1	2
2.5303	1	1	2
1.9936	1	1	2
2.296	1	1	2
2.428	1	1	2
1.9787	1	1	2
2.369	1	1	2
2.4327	1	1	2
2.3293	1	1	2
2.029	1	1	2
1.7743	1	1	2
2.4267	1	1	2
2.3415	1	1	2
1.8342	1	1	2
1.4734	1	1	2
2.4582	1	1	2
2.2043	1	1	2
2.2263	1	1	2
2.2163	1	1	2
2.3562	1	1	2
2.4694	1	1	2
2.3922	1	1	2
2.4079	1	1	2
1.9774	1	1	2
1.325	1	1	2
2.4208	1	1	2
2.0925	1	1	2
1.0959	1	1	2
1.3409	1	1	2
1.6843	1	1	2
2.1032	1	1	2
1.1982	1	1	2
1.404	1	1	2
1.5436	1	1	2
1.5603	1	1	2
1.2454	1	1	2
1.6209	1	1	2
1.8829	1	1	2
1.8802	1	1	2
1.6384	1	1	2
1.5415	1	1	2
1.4479	1	1	2
1.7877	1	1	2
1.8627	1	1	2
1.6953	1	1	2
1.5437	1	1	2
1.8216	1	1	2
1.8565	1	1	2
2.2357	1	1	2
2.4467	1	1	2
1.907	1	1	2
2.0211	1	1	2
2.0288	1	1	2
1.8539	1	1	2
1.7236	1	1	2
1.513	1	1	2
2.3933	1	1	2
2.0399	1	1	2
2.1842	1	1	2
2.3222	1	1	2
2.0554	1	1	2
2.0524	1	1	2
1.7853	1	1	2
1.7297	1	1	2
2.1477	1	1	2
2.1982	1	1	2
2.3073	1	1	2
2.1233	1	1	2
2.1327	1	1	2
1.8701	1	1	2
2.0557	1	1	2
1.6594	1	1	2
1.8596	1	1	2
1.6953	1	1	2
2.0173	1	1	2
1.9153	1	1	2
2.1712	1	1	2
2.011	1	1	2
1.7008	1	1	2
1.6402	1	1	2
2.1146	1	1	2
1.8336	1	1	2
1.6205	1	1	2
1.9864	1	1	2
1.5866	1	1	2
1.8176	1	1	2
1.951	1	1	2
2.1525	1	1	2
2.2681	1	1	2
2.1307	1	1	2
2.0838	1	1	2
2.0127	1	1	2
1.7708	1	1	2
1.9589	1	1	2
2.0046	1	1	2
1.879	1	1	2
2.2066	1	1	2
1.8745	1	1	2
1.9423	1	1	2
2.0798	1	1	2
2.117	1	1	2
1.8586	1	1	2
1.583	1	1	2
1.9619	1	1	2
1.6736	1	1	2
2.1924	1	1	2
1.966	1	1	2
1.9749	1	1	2
2.18	1	1	2
1.7845	1	1	2
1.9924	1	1	2
2.0256	1	1	2
2.1157	1	1	2
1.9638	1	1	2
1.8845	1	1	2
1.962	1	1	2
1.9953	1	1	2
2.0298	1	1	2
1.8369	1	1	2
1.6136	1	1	2
2.3485	1	1	2
2.075	1	1	2
1.998	1	1	2
2.1317	1	1	2
1.8815	1	1	2
2.078	1	1	2
2.2049	1	1	2
2.0555	1	1	2
2.0126	1	1	2
1.7231	1	1	2
2.1863	1	1	2
1.826	1	1	2
1.7036	1	1	2
1.993	1	1	2
2.1127	1	1	2
2.1968	1	1	2
2.1271	1	1	2
1.9739	1	1	2
2.1683	1	1	2
1.9578	1	1	2
1.7817	1	1	2
2.0218	1	1	2
1.8682	1	1	2
2.0273	1	1	2
1.8539	1	1	2
2.1512	1	1	2
1.8357	1	1	2
1.5154	1	1	2
1.8321	1	1	2
1.8149	1	1	2
1.9716	1	1	2
1.9239	1	1	2
1.4256	1	1	2
1.2668	1	1	2
1.8017	1	1	2
1.3157	1	1	2
1.4614	1	1	2
0.89027	1	1	2
1.3471	1	1	2
1.5588	1	1	2
2.1908	1	1	2
1.5284	1	1	2
2.0835	1	1	2
1.816	1	1	2
1.5798	1	1	2
1.5438	1	1	2
1.693	1	1	2
1.7502	1	1	2
1.709	1	1	2
1.7804	1	1	2
1.4888	1	1	2
1.1246	1	1	2
1.7042	1	1	2
1.6205	1	1	2
1.481	1	1	2
1.2549	1	1	2
1.3145	1	1	2
1.6236	1	1	2
2.0709	1	1	2
1.3831	1	1	2
1.408	1	1	2
1.5833	1	1	2
1.9985	1	1	2
2.0624	1	1	2
1.9408	1	1	2
1.7782	1	1	2
1.9135	1	1	2
2.0676	1	1	2
1.3326	1	1	2
1.8119	1	1	2
2.0018	1	1	2
1.3621	1	1	2
1.882	1	1	2
1.945	1	1	2
1.7143	1	1	2
1.3941	1	1	2
2.3005	1	1	2
1.8221	1	1	2
1.2105	1	1	2
1.3511	1	1	2
1.4574	1	1	2
2.1625	1	1	2
1.1838	1	1	2
1.7329	1	1	2
1.3505	1	1	2
1.0345	1	1	2
1.4249	1	1	2
2.2207	1	1	2
1.7672	1	1	2
1.5383	1	1	2
1.3594	1	1	2
1.8155	1	1	2
1.2423	1	1	2
1.5641	1	1	2
1.8116	1	1	2
1.6791	1	1	2
1.9267	1	1	2
1.8284	1	1	2
1.6747	1	1	2
1.5143	1	1	2
1.7845	1	1	2
1.3264	1	1	2
1.904	1	1	2
1.4972	1	1	2
1.8229	1	1	2
1.7729	1	1	2
2.0214	1	1	2
2.0108	1	1	2
1.6501	1	1	2
1.8304	1	1	2
1.685	1	1	2
1.8152	1	1	2
2.0703	1	1	2
1.5185	1	1	2
1.2056	1	1	2
1.8516	1	1	2
1.9995	1	1	2
2.0459	1	1	2
1.2432	1	1	2
2.1414	1	1	2
1.9761	1	1	2
1.4909	1	1	2
1.2251	1	1	2
1.6002	1	1	2
0.90064	1	1	2
1.7415	1	1	2
1.8955	1	1	2
1.8367	1	1	2
2.0054	1	1	2
1.1704	1	1	2
1.8398	1	1	2
1.8348	1	1	2
1.5567	1	1	2
2.2508	1	1	2
1.7385	1	1	2
2.1114	1	1	2
2.0605	1	1	2
2.0381	1	1	2
1.5053	1	1	2
2.039	1	1	2
1.9429	1	1	2
1.9292	1	1	2
1.8719	1	1	2
2.0908	1	1	2
2.0814	1	1	2
1.9651	1	1	2
1.3262	1	1	2
2.0746	1	1	2
1.8273	1	1	2
1.806	1	1	2
1.5678	1	1	2
1.8647	1	1	2
1.9226	1	1	2
2.0846	1	1	2
2.0746	1	1	2
1.9308	1	1	2
1.4619	1	1	2
2.2476	1	1	2
1.7047	1	1	2
1.3723	1	1	2
1.8456	1	1	2
1.5589	1	1	2
1.8819	1	1	2
1.8502	1	1	2
1.1051	1	1	2
1.1617	1	1	2
1.5136	1	1	2
1.4276	1	1	2
1.7212	1	1	2
1.9581	1	1	2
1.979	1	1	2
1.2453	1	1	2
1.5266	1	1	2
1.5094	1	1	2
1.8584	1	1	2
0.98392	1	1	2
1.2138	1	1	2
1.6931	1	1	2
1.8777	1	1	2
2.0285	1	1	2
1.7335	1	1	2
1.9589	1	1	2
2.0628	1	1	2
0.99288	1	1	2
1.5378	1	1	2
2.3347	1	1	2
1.8412	1	1	2
1.9892	1	1	2
1.5231	1	1	2
1.1568	1	1	2
1.8876	1	1	2
2.0522	1	1	2
1.6964	1	1	2
1.5605	1	1	2
1.7574	1	1	2
1.5577	1	1	2
1.1632	1	1	2
1.1305	1	1	2
1.1902	1	1	2
1.6045	1	1	2
1.7257	1	1	2
1.5648	1	1	2
1.2541	1	1	3
1.0542	1	1	3
1.5343	1	1	3
1.158	1	1	3
1.4757	1	1	3
1.2349	1	1	3
1.2555	1	1	3
0.86094	1	1	3
0.90543	1	1	3
1.3696	1	1	3
1.3165	1	1	3
1.3415	1	1	3
1.0766	1	1	3
1.3031	1	1	3
2.1247	1	1	3
1.5167	1	1	3
1.938	1	1	3
1.9882	1	1	3
1.5836	1	1	3
1.6855	1	1	3
2.1209	1	1	3
1.8765	1	1	3
1.2099	1	1	3
1.4673	1	1	3
1.4474	1	1	3
1.6675	1	1	3
1.3664	1	1	3
1.5408	1	1	3
1.6982	1	1	3
1.5191	1	1	3
1.5866	1	1	3
1.5235	1	1	3
1.7689	1	1	3
1.2938	1	1	3
1.6868	1	1	3
1.8811	1	1	3
1.4107	1	1	3
1.3063	1	1	3
1.5253	1	1	3
1.7235	1	1	3
1.649	1	1	3
1.4989	1	1	3
1.6614	1	1	3
1.4248	1	1	3
1.7955	1	1	3
1.7578	1	1	3
1.8653	1	1	3
1.8137	1	1	3
1.7786	1	1	3
1.7703	1	1	3
1.9589	1	1	3
1.6136	1	1	3
1.7176	1	1	3
1.5793	1	1	3
1.6211	1	1	3
1.7573	1	1	3
1.8871	1	1	3
1.7436	1	1	3
1.6462	1	1	3
1.7261	1	1	3
1.8297	1	1	3
1.5108	1	1	3
1.7522	1	1	3
1.6698	1	1	3
1.6602	1	1	3
2.1364	1	1	3
1.9981	1	1	3
1.8487	1	1	3
1.9496	1	1	3
2.1274	1	1	3
1.7482	1	1	3
1.9178	1	1	3
2.0607	1	1	3
1.799	1	1	3
2.0575	1	1	3
2.1841	1	1	3
2.178	1	1	3
2.2623	1	1	3
1.963	1	1	3
1.9044	1	1	3
2.1002	1	1	3
2.127	1	1	3
2.3055	1	1	3
2.2871	1	1	3
2.1172	1	1	3
2.1971	1	1	3
2.0549	1	1	3
2.0269	1	1	3
2.1026	1	1	3
[truncated: 16,203 more rows]
