# Supplementary material for: Breakdown of local information processing may underlie isoflurane anesthesia effects
Source: PLoS Comput Biol. 2017 Jun 1;13(6):e1005511. doi: 10.1371/journal.pcbi.1005511 (PMC5453425; doi:10.1371/journal.pcbi.1005511)
Supplement: S1 Dataset — (ZIP) [file pcbi.1005511.s001.zip › ferret_2_ais_ksg_raw_median.csv]

raw data	data z_scored	factor direction	factor anesthesia
1.2648	-1.5544	1	1
1.2959	-1.494	1	1
0.78315	-2.489	1	1
1.1511	-1.775	1	1
0.82358	-2.4105	1	1
1.7154	-0.68012	2	1
1.8611	-0.39743	2	1
1.8872	-0.34688	2	1
1.8724	-0.37567	2	1
2.0074	-0.11374	2	1
1.5517	-0.99784	1	2
1.8798	-0.3613	1	2
1.5982	-0.9076	1	2
1.6458	-0.81521	1	2
1.476	-1.1447	1	2
1.5891	-0.92531	1	2
2.246	0.34923	2	2
2.3774	0.60426	2	2
2.1473	0.15774	2	2
2.1333	0.13051	2	2
1.9994	-0.12916	2	2
2.1508	0.16457	2	2
2.689	1.2088	1	3
2.3596	0.56964	1	3
1.8241	-0.46937	1	3
1.8747	-0.37121	1	3
1.8333	-0.4515	1	3
2.534	0.90806	1	3
2.1635	0.18921	1	3
2.6242	1.083	1	3
2.7331	1.2944	1	3
2.7737	1.3732	1	3
2.7079	1.2455	1	3
2.4599	0.76418	2	3
2.3079	0.46938	2	3
2.4251	0.69671	2	3
2.4638	0.77175	2	3
2.4555	0.75573	2	3
2.5591	0.95668	2	3
2.5291	0.89849	2	3
2.5381	0.91593	2	3
2.5225	0.88569	2	3
2.5374	0.91461	2	3
2.5312	0.90269	2	3
