# Supplementary material for: Breakdown of local information processing may underlie isoflurane anesthesia effects
Source: PLoS Comput Biol. 2017 Jun 1;13(6):e1005511. doi: 10.1371/journal.pcbi.1005511 (PMC5453425; doi:10.1371/journal.pcbi.1005511)
Supplement: S1 Dataset — (ZIP) [file pcbi.1005511.s001.zip › ferret_2_ais_nsb_mean_param_interaction.csv]

mean PFC	sem PFC	mean V1	sem V1
1.7517	0.0088781	1.6688	0.029499
1.8044	0.012101	1.764	0.0081408
1.764	0.014703	1.7747	0.0060894
