# Supplementary material for: Breakdown of local information processing may underlie isoflurane anesthesia effects
Source: PLoS Comput Biol. 2017 Jun 1;13(6):e1005511. doi: 10.1371/journal.pcbi.1005511 (PMC5453425; doi:10.1371/journal.pcbi.1005511)
Supplement: S1 Dataset — (ZIP) [file pcbi.1005511.s001.zip › ferret_2_ais_nsb_raw_mean.csv]

raw data	factor direction	factor anesthesia
1.7272	1	1
1.7539	1	1
1.756	1	1
1.7696	1	1
1.7211	2	1
1.59	2	1
1.706	2	1
1.6579	2	1
1.8162	1	2
1.8332	1	2
1.8185	1	2
1.7654	1	2
1.7889	1	2
1.7721	2	2
1.7838	2	2
1.7746	2	2
1.7483	2	2
1.7415	2	2
1.8023	1	3
1.8297	1	3
1.79	1	3
1.7945	1	3
1.7605	1	3
1.7996	1	3
1.7432	1	3
1.6925	1	3
1.7028	1	3
1.7253	1	3
1.7413	2	3
1.7988	2	3
1.7958	2	3
1.8021	2	3
1.7705	2	3
1.7579	2	3
1.7655	2	3
1.7678	2	3
1.7758	2	3
1.7715	2	3
