# Supplementary material for: Breakdown of local information processing may underlie isoflurane anesthesia effects
Source: PLoS Comput Biol. 2017 Jun 1;13(6):e1005511. doi: 10.1371/journal.pcbi.1005511 (PMC5453425; doi:10.1371/journal.pcbi.1005511)
Supplement: S1 Dataset — (ZIP) [file pcbi.1005511.s001.zip › ferret_2_h_ksg_median_param_interaction.csv]

mean PFC	sem PFC	mean V1	sem V1
1.8156	0.23658	0.37568	0.099461
0.85547	0.1026	-0.062599	0.10353
-0.56831	0.25563	-0.86022	0.071461
