# Supplementary material for: Breakdown of local information processing may underlie isoflurane anesthesia effects
Source: PLoS Comput Biol. 2017 Jun 1;13(6):e1005511. doi: 10.1371/journal.pcbi.1005511 (PMC5453425; doi:10.1371/journal.pcbi.1005511)
Supplement: S1 Dataset — (ZIP) [file pcbi.1005511.s001.zip › ferret_2_h_ksg_raw_lmm.csv]

raw data	factor anesthesia	factor direction	factor recording
-14.935	1	0	1
-8.0921	1	0	1
-1.1715	1	0	1
-6.4074	1	0	1
2.2842	1	0	1
1.4592	1	0	1
1.3366	1	0	1
-0.27919	1	0	1
-1.5393	1	0	1
-6.0742	1	0	1
-1.1325	1	0	1
0.0077766	1	0	1
-2.9434	1	0	1
2.5942	1	0	1
3.7691	1	0	1
-5.7631	1	0	1
-4.7135	1	0	1
-2.6628	1	0	1
-7.2249	1	0	1
-1.771	1	0	1
-3.3308	1	0	1
-7.544	1	0	1
2.7273	1	0	1
-0.26155	1	0	1
1.8088	1	0	1
3.7805	1	0	1
-1.7374	1	0	1
-13.103	1	0	1
-8.3887	1	0	1
-6.9265	1	0	1
0.47709	1	0	1
-4.6607	1	0	1
0.51584	1	0	1
3.3402	1	0	1
1.5246	1	0	1
-5.3464	1	0	1
-9.5061	1	0	1
-5.1812	1	0	1
-3.4686	1	0	1
-1.276	1	0	1
-0.33241	1	0	1
-8.1686	1	0	1
-7.8838	1	0	1
-12.189	1	0	1
-6.6971	1	0	1
-11.959	1	0	1
4.1283	1	0	1
-1.8696	1	0	1
-10.808	1	0	1
1.1116	1	0	1
-7.8461	1	0	1
-4.9141	1	0	1
0.45083	1	0	1
1.9107	1	0	1
-7.9694	1	0	1
-9.2347	1	0	1
1.9302	1	0	1
-4.2844	1	0	1
-4.7429	1	0	1
-7.1583	1	0	1
-11.5	1	0	1
-3.3718	1	0	1
3.0259	1	0	1
0.14616	1	0	1
-3.867	1	0	1
-9.1388	1	0	1
-4.8076	1	0	1
-13.928	1	0	1
-7.0274	1	0	1
-4.7116	1	0	1
0.13691	1	0	1
-2.4846	1	0	1
-4.6447	1	0	1
-2.7631	1	0	1
-3.1786	1	0	1
-10.418	1	0	1
-10.039	1	0	1
-7.6072	1	0	1
-12.639	1	0	1
-6.1274	1	0	1
-4.5778	1	0	1
-0.050313	1	0	1
-10.203	1	0	1
-5.1907	1	0	1
-1.7275	1	0	1
1.5442	1	0	1
-2.8092	1	0	1
2.6663	1	0	1
-0.092619	1	0	1
0.097202	1	0	1
-0.30503	1	0	1
-11.263	1	0	1
-0.10978	1	0	1
-6.171	1	0	1
1.5074	1	0	1
0.52543	1	0	1
6.1709	1	0	1
3.7336	1	0	1
-0.43842	1	0	1
-3.3992	1	0	1
-1.4279	1	0	1
1.4286	1	0	1
-2.4144	1	0	1
-1.7534	1	0	1
-0.13345	1	0	1
-1.554	1	0	1
0.31257	1	0	1
-7.6186	1	0	1
-8.5701	1	0	1
-2.0754	1	0	1
-4.2408	1	0	1
-7.2518	1	0	1
-4.2822	1	0	1
-3.5444	1	0	1
-11.882	1	0	1
-5.9188	1	0	1
-0.087206	1	0	1
-6.476	1	0	1
-8.4822	1	0	1
-9.8984	1	0	1
-3.0699	1	0	1
-3.1222	1	0	1
-2.7086	1	0	1
1.7121	1	0	1
-6.3752	1	0	1
-3.9701	1	0	1
5.7264	1	0	1
1.0126	1	0	1
1.3069	1	0	1
1.8048	1	0	1
-0.97039	1	0	1
-2.2618	1	0	1
0.87275	1	0	1
5.8489	1	0	1
-2.028	1	0	1
2.9733	1	0	1
5.121	1	0	1
-9.4829	1	0	1
-7.1813	1	0	1
1.4439	1	0	1
-1.6743	1	0	1
-1.3332	1	0	1
0.84478	1	0	1
-2.4201	1	0	1
0.88043	1	0	1
-4.5221	1	0	1
-6.4229	1	0	1
-7.2205	1	0	1
-7.8614	1	0	1
-4.6651	1	0	1
0.85321	1	0	1
0.13072	1	0	1
-5.9599	1	0	1
-8.074	1	0	1
-8.2248	1	0	1
-8.5592	1	0	1
-11.885	1	0	1
-9.2524	1	0	1
-7.3468	1	0	1
-10.739	1	0	1
-1.6138	1	0	1
2.2202	1	0	1
4.7715	1	0	1
-2.2888	1	0	1
0.16728	1	0	1
-0.66038	1	0	1
-6.9187	1	0	1
-19.896	1	0	1
-8.1277	1	0	1
-2.9322	1	0	1
-2.4638	1	0	1
-0.3834	1	0	1
-5.2969	1	0	1
-2.495	1	0	1
-0.66148	1	0	1
-0.17005	1	0	1
-7.8602	1	0	1
-4.2404	1	0	1
2.2883	1	0	1
0.28629	1	0	1
-7.0393	1	0	1
-11.504	1	0	1
1.6376	1	0	1
-0.11451	1	0	1
-0.81262	1	0	1
-2.5243	1	0	1
-4.9707	1	0	1
-3.6108	1	0	1
-5.9445	1	0	1
-4.4964	1	0	1
-7.5377	1	0	1
-5.7671	1	0	1
-6.7107	1	0	1
-14.536	1	0	1
-3.5089	1	0	1
1.9216	1	0	1
-5.2409	1	0	1
4.0654	1	0	1
-3.2574	1	0	1
-0.66359	1	0	1
3.0363	1	0	1
-3.3918	1	0	2
0.59374	1	0	2
-0.029001	1	0	2
-7.1179	1	0	2
-5.7183	1	0	2
-4.47	1	0	2
-1.3821	1	0	2
0.44116	1	0	2
-11.264	1	0	2
-9.6189	1	0	2
-8.5139	1	0	2
2.337	1	0	2
4.6085	1	0	2
0.022021	1	0	2
3.8769	1	0	2
3.7192	1	0	2
-2.6263	1	0	2
-1.4021	1	0	2
-1.2804	1	0	2
-0.31364	1	0	2
-2.5263	1	0	2
3.6429	1	0	2
-11.841	1	0	2
1.8971	1	0	2
1.755	1	0	2
-18.121	1	0	2
-2.7891	1	0	2
-5.1355	1	0	2
-8.2045	1	0	2
-11.849	1	0	2
-4.519	1	0	2
-10.972	1	0	2
-7.2787	1	0	2
-9.6644	1	0	2
1.8281	1	0	2
4.0109	1	0	2
-11.158	1	0	2
-5.2015	1	0	2
-15.305	1	0	2
-3.734	1	0	2
-3.3352	1	0	2
-11.437	1	0	2
-6.3102	1	0	2
-6.7947	1	0	2
-12.001	1	0	2
-17.321	1	0	2
-13.358	1	0	2
-0.83608	1	0	2
-9.2526	1	0	2
-10.669	1	0	2
-8.7442	1	0	2
-4.5057	1	0	2
-5.8249	1	0	2
-8.012	1	0	2
-14.407	1	0	2
-0.50318	1	0	2
-3.6284	1	0	2
-3.9777	1	0	2
0.0080638	1	0	2
-0.29506	1	0	2
-9.7509	1	0	2
-6.2026	1	0	2
-3.3825	1	0	2
2.924	1	0	2
-0.062514	1	0	2
-0.61699	1	0	2
-6.319	1	0	2
-6.8466	1	0	2
-7.2966	1	0	2
-8.3743	1	0	2
-1.2062	1	0	2
-6.0334	1	0	2
-3.5568	1	0	2
-2.9749	1	0	2
-9.6125	1	0	2
-7.1675	1	0	2
-2.0131	1	0	2
0.087891	1	0	2
-4.1995	1	0	2
0.014514	1	0	2
-2.8721	1	0	2
-0.65707	1	0	2
-7.7055	1	0	2
-12.465	1	0	2
-12.734	1	0	2
-9.0728	1	0	2
-1.1957	1	0	2
2.1251	1	0	2
-12.055	1	0	2
-15.244	1	0	2
1.5288	1	0	2
1.0989	1	0	2
-1.3566	1	0	2
-10.269	1	0	2
-3.7026	1	0	2
-8.5853	1	0	2
-3.9729	1	0	2
-13.508	1	0	2
2.1263	1	0	2
-1.6828	1	0	2
-5.6629	1	0	2
-12.319	1	0	2
-2.0315	1	0	2
-1.7137	1	0	2
-11.021	1	0	2
-10.47	1	0	2
-5.5406	1	0	2
-5.9523	1	0	2
-10.144	1	0	2
-7.2395	1	0	2
-13.217	1	0	2
1.7101	1	0	2
-12.312	1	0	2
-7.3598	1	0	2
-7.1019	1	0	2
-6.4858	1	0	2
-4.8297	1	0	2
0.073423	1	0	2
-0.42211	1	0	2
4.1598	1	0	2
0.22309	1	0	2
-5.1618	1	0	2
-5.7838	1	0	2
-0.41871	1	0	2
-7.7693	1	0	2
-5.2748	1	0	2
-0.53403	1	0	2
-4.661	1	0	2
-4.1448	1	0	2
-1.9597	1	0	2
-4.5471	1	0	2
-2.6119	1	0	2
-3.6028	1	0	2
-2.6747	1	0	2
-6.618	1	0	2
1.7654	1	0	2
-1.8251	1	0	2
2.1339	1	0	2
1.0398	1	0	2
-3.696	1	0	2
-2.236	1	0	2
-2.0899	1	0	2
-6.9377	1	0	2
-7.6863	1	0	2
-4.1208	1	0	2
-4.6051	1	0	2
-0.36872	1	0	2
1.832	1	0	2
1.506	1	0	2
-3.7923	1	0	2
-5.0926	1	0	2
-2.5795	1	0	2
-2.4467	1	0	2
-1.4183	1	0	2
-1.9302	1	0	2
3.8306	1	0	2
2.4237	1	0	2
-5.7824	1	0	2
-7.1529	1	0	2
-14.458	1	0	2
-4.6356	1	0	2
-3.6284	1	0	2
-8.2157	1	0	2
-12.388	1	0	2
1.6504	1	0	2
-6.0154	1	0	2
-6.2535	1	0	2
-8.7332	1	0	2
-9.8505	1	0	2
-2.4291	1	0	2
-10.027	1	0	2
-1.9149	1	0	2
-1.9688	1	0	2
-4.2948	1	0	2
-6.7375	1	0	2
-1.7472	1	0	2
-6.5403	1	0	2
-3.203	1	0	2
0.6671	1	0	2
-0.26647	1	0	2
0.71384	1	0	2
-0.46182	1	0	2
-0.80125	1	0	2
-10.486	1	0	2
-3.8819	1	0	2
1.1877	1	0	2
-1.7532	1	0	2
-5.4575	1	0	2
-6.0807	1	0	2
3.1511	1	0	2
-4.6267	1	0	2
-3.2331	1	0	2
-7.2352	1	0	2
-1.8572	1	0	2
-8.0976	1	0	2
-11.782	1	0	2
1.3634	1	0	2
0.13607	1	0	2
-7.1344	1	0	2
-10.029	1	0	2
0.38611	1	0	2
-2.9004	1	0	2
-5.1387	1	0	2
-3.5715	1	0	2
-5.4335	1	0	2
-5.625	1	0	2
-10.26	1	0	2
-5.2874	1	0	2
-5.6288	1	0	2
-8.5492	1	0	2
-13.821	1	0	2
-9.387	1	0	2
-3.3578	1	0	2
-3.9965	1	0	2
-4.4134	1	0	2
-1.4499	1	0	2
-2.5477	1	0	2
-7.8565	1	0	2
-6.6155	1	0	2
-0.24253	1	0	2
-4.176	1	0	2
-0.093454	1	0	2
-6.5875	1	0	2
-0.2969	1	0	2
-6.7256	1	0	2
-9.6928	1	0	2
-4.3393	1	0	2
-4.2512	1	0	2
-10.244	1	0	2
-4.4655	1	0	2
-5.7793	1	0	2
-5.0549	1	0	2
4.5645	1	0	2
-0.044591	1	0	2
3.2052	1	0	2
0.022535	1	0	2
-7.3893	1	0	2
-2.0268	1	0	2
0.66649	1	0	2
-8.1216	1	0	2
-6.1419	1	0	2
-9.6613	1	0	2
-1.6711	1	0	2
-3.1473	1	0	2
-4.0387	1	0	2
-2.5968	1	0	2
-9.8763	1	0	2
-8.7703	1	0	2
1.6946	1	0	2
-4.5243	1	0	2
-13.523	1	0	2
-2.6173	1	0	2
-5.2445	1	0	2
-16.935	1	0	2
-4.9584	1	0	2
1.338	1	0	2
-4.9823	1	0	2
-4.1316	1	0	2
-6.8103	1	0	2
0.55077	1	0	2
-5.9698	1	0	2
-7.9434	1	0	2
-7.459	1	0	2
-9.569	1	0	2
-2.3258	1	0	2
-1.7276	1	0	2
1.536	1	0	2
-16.51	1	0	2
-11.254	1	0	2
-3.7223	1	0	2
-2.8231	1	0	2
0.82421	1	0	2
0.095636	1	0	2
-6.0902	1	0	2
-7.8366	1	0	2
1.1982	1	0	2
-3.2611	1	0	2
-3.4307	1	0	2
-17.428	1	0	2
0.95508	1	0	2
-3.2071	1	0	2
2.1463	1	0	2
-2.7597	1	0	2
4.8445	1	0	2
-1.2737	1	0	2
0.63089	1	0	2
-8.3073	1	0	2
-0.23952	1	0	2
-0.29187	1	0	2
-8.4558	1	0	2
3.137	1	0	2
-0.88243	1	0	2
0.2497	1	0	2
-0.50693	1	0	2
3.2267	1	0	2
-3.1731	1	0	2
-5.8849	1	0	2
-8.2078	1	0	2
-4.4358	1	0	2
4.1898	1	0	2
1.9973	1	0	2
-3.4103	1	0	2
-7.2373	1	0	2
-4.0017	1	0	2
-4.5471	1	0	2
-6.326	1	0	2
-0.2108	1	0	2
-2.6469	1	0	2
-6.9747	1	0	2
-7.7881	1	0	2
2.3164	1	0	2
-5.1768	1	0	2
-4.3894	1	0	2
-2.5496	1	0	2
1.8797	1	0	2
-9.1503	1	0	2
-5.2939	1	0	2
-1.6152	1	0	2
0.7177	1	0	2
-9.5959	1	0	2
1.9877	1	0	2
-9.0558	1	0	2
-7.9666	1	0	2
-1.4815	1	0	2
-2.2469	1	0	2
1.9887	1	0	2
-4.5206	1	0	2
-4.3288	1	0	2
-1.4976	1	0	2
0.13774	1	0	2
0.25537	1	0	2
-0.47017	1	0	2
-0.93281	1	0	2
-5.7717	1	0	2
3.3422	1	0	2
1.5777	1	0	2
-7.4789	1	0	2
-3.0098	1	0	2
-5.8618	1	0	2
-4.6807	1	0	2
-0.080142	1	0	2
1.6132	1	0	2
-1.8127	1	0	2
1.8308	1	0	2
-3.1498	1	0	2
-0.32761	1	0	2
0.85119	1	0	2
2.5954	1	0	2
3.732	1	0	2
2.8325	1	0	2
-0.23073	1	0	2
-3.3146	1	0	2
-7.5219	1	0	2
-5.7833	1	0	2
1.6194	1	0	2
1.9104	1	0	2
3.0828	1	0	2
-1.9313	1	0	2
-1.9714	1	0	2
0.21848	1	0	2
1.7904	1	0	2
4.22	1	0	2
-6.4529	1	0	2
-0.097481	1	0	2
0.01998	1	0	2
-7.0769	1	0	2
1.0488	1	0	2
3.1635	1	0	2
0.55575	1	0	2
-0.98931	1	0	2
-4.3172	1	0	2
1.0578	1	0	2
-8.8246	1	0	2
-1.5997	1	0	2
-5.5571	1	0	2
-11.375	1	0	2
-8.5175	1	0	2
-6.5276	1	0	2
-3.2616	1	0	2
4.2298	1	0	2
1.5584	1	0	2
-1.2013	1	0	2
-2.8033	1	0	2
-4.3193	1	0	2
2.0742	1	0	2
-1.9618	1	0	2
-4.3706	1	0	2
-4.4571	1	0	2
-4.31	1	0	2
-4.3107	1	0	2
-4.7064	1	0	2
-5.1757	1	0	2
-1.5369	1	0	2
0.73532	1	0	2
0.51642	1	0	2
3.7329	1	0	2
2.4681	1	0	2
-2.2229	1	0	2
-10.574	1	0	2
-2.4687	1	0	2
-5.3537	1	0	2
-3.8139	1	0	2
-1.5077	1	0	2
-3.6842	1	0	2
-6.5494	1	0	2
-0.91855	1	0	2
-6.9596	1	0	2
-2.8628	1	0	2
-5.276	1	0	2
-2.2715	1	0	2
-2.3066	1	0	2
-5.8769	1	0	2
-6.7713	1	0	2
-1.1768	1	0	2
-10.784	1	0	2
1.2588	1	0	2
-1.1787	1	0	2
-3.1084	1	0	2
-3.3312	1	0	2
-6.8209	1	0	2
-11.615	1	0	2
-5.9693	1	0	2
-6.5284	1	0	2
-3.4135	1	0	2
-6.731	1	0	2
1.5047	1	0	2
4.5903	1	0	2
-3.2119	1	0	2
3.0826	1	0	2
-8.3134	1	0	2
-11.963	1	0	2
5.871	1	0	3
1.0876	1	0	3
5.8068	1	0	3
6.9356	1	0	3
5.9181	1	0	3
8.0732	1	0	3
7.5608	1	0	3
8.0448	1	0	3
8.1511	1	0	3
7.1947	1	0	3
5.6752	1	0	3
1.868	1	0	3
7.8674	1	0	3
7.6399	1	0	3
4.7652	1	0	3
6.4201	1	0	3
6.2627	1	0	3
5.6488	1	0	3
7.8298	1	0	3
7.3164	1	0	3
6.4091	1	0	3
6.314	1	0	3
7.7207	1	0	3
5.8698	1	0	3
7.5582	1	0	3
7.6215	1	0	3
5.9012	1	0	3
7.2511	1	0	3
6.1028	1	0	3
7.3953	1	0	3
6.7312	1	0	3
7.2676	1	0	3
7.4583	1	0	3
4.6117	1	0	3
6.963	1	0	3
7.2836	1	0	3
7.2483	1	0	3
7.641	1	0	3
4.981	1	0	3
6.1913	1	0	3
6.0307	1	0	3
7.5661	1	0	3
7.1942	1	0	3
7.3401	1	0	3
6.7275	1	0	3
6.6481	1	0	3
7.5836	1	0	3
7.9061	1	0	3
7.4177	1	0	3
7.0803	1	0	3
7.3181	1	0	3
7.1181	1	0	3
7.4456	1	0	3
5.9093	1	0	3
6.3978	1	0	3
6.3777	1	0	3
6.336	1	0	3
5.3617	1	0	3
8.0146	1	0	3
5.8947	1	0	3
6.8645	1	0	3
7.7944	1	0	3
7.3413	1	0	3
6.6156	1	0	3
7.4459	1	0	3
5.8118	1	0	3
6.4106	1	0	3
7.731	1	0	3
7.8088	1	0	3
6.6272	1	0	3
7.2624	1	0	3
6.9173	1	0	3
7.1715	1	0	3
7.3799	1	0	3
4.8472	1	0	3
6.6385	1	0	3
7.255	1	0	3
6.2412	1	0	3
6.3691	1	0	3
6.4697	1	0	3
6.941	1	0	3
6.3184	1	0	3
0.6638	1	0	3
3.5347	1	0	3
5.2464	1	0	3
5.9058	1	0	3
1.7022	1	0	3
4.5891	1	0	3
5.0883	1	0	3
4.2683	1	0	3
1.7905	1	0	3
6.4997	1	0	3
7.1508	1	0	3
6.7354	1	0	3
5.871	1	0	3
5.8933	1	0	3
4.5764	1	0	3
4.5301	1	0	3
6.2766	1	0	3
2.3212	1	0	3
5.2701	1	0	3
3.6454	1	0	3
6.02	1	0	3
5.7612	1	0	3
5.3652	1	0	3
5.3288	1	0	3
5.1387	1	0	3
7.1225	1	0	3
1.0726	1	0	3
2.1832	1	0	3
6.9465	1	0	3
6.8101	1	0	3
4.5023	1	0	3
-0.3632	1	0	3
7.2618	1	0	3
7.4653	1	0	3
5.2721	1	0	3
8.0081	1	0	3
6.6788	1	0	3
8.065	1	0	3
-2.4003	1	0	3
4.7604	1	0	3
7.4779	1	0	3
7.585	1	0	3
7.7936	1	0	3
7.0534	1	0	3
7.1244	1	0	3
6.8998	1	0	3
6.8463	1	0	3
6.8598	1	0	3
4.393	1	0	3
6.0077	1	0	3
4.0253	1	0	3
5.1102	1	0	3
6.1911	1	0	3
5.5684	1	0	3
6.3822	1	0	3
7.2517	1	0	3
3.1651	1	0	3
6.1272	1	0	3
7.1182	1	0	3
6.8462	1	0	3
6.1907	1	0	3
6.6456	1	0	3
4.0822	1	0	3
7.1318	1	0	3
5.8633	1	0	3
6.3995	1	0	3
7.061	1	0	3
7.3735	1	0	3
7.7851	1	0	3
6.2092	1	0	3
4.4013	1	0	3
4.8144	1	0	3
7.46	1	0	3
5.1066	1	0	3
7.2201	1	0	3
4.6499	1	0	3
6.0805	1	0	3
6.4289	1	0	3
6.8036	1	0	3
7.2676	1	0	3
7.6785	1	0	3
6.8833	1	0	3
5.0511	1	0	3
6.8862	1	0	3
6.2466	1	0	3
6.6359	1	0	3
6.954	1	0	3
6.2571	1	0	3
6.5206	1	0	3
6.0787	1	0	3
5.5418	1	0	3
7.2017	1	0	3
7.1914	1	0	3
7.4367	1	0	3
7.069	1	0	3
7.5583	1	0	3
5.4609	1	0	3
7.087	1	0	3
6.7863	1	0	3
6.5562	1	0	3
5.7962	1	0	3
4.2499	1	0	3
6.7179	1	0	3
4.0789	1	0	3
5.5876	1	0	3
6.4233	1	0	3
4.3405	1	0	3
5.8749	1	0	3
6.1625	1	0	3
4.1667	1	0	3
5.8657	1	0	3
6.1111	1	0	3
6.3709	1	0	3
5.757	1	0	3
6.38	1	0	3
6.0747	1	0	3
7.3208	1	0	3
2.5642	1	0	3
4.6675	1	0	3
5.6163	1	0	3
4.7037	1	0	3
5.3261	1	0	3
4.5321	1	0	3
4.6509	1	0	3
7.621	1	0	3
7.7554	1	0	3
7.5545	1	0	3
7.2644	1	0	3
7.8081	1	0	3
5.7348	1	0	3
4.1882	1	0	3
6.7109	1	0	3
6.4602	1	0	3
6.8239	1	0	3
5.0104	1	0	3
4.7608	1	0	3
6.8515	1	0	3
7.545	1	0	3
6.9337	1	0	3
5.9722	1	0	3
6.5145	1	0	3
5.4038	1	0	3
6.3054	1	0	3
5.5573	1	0	3
3.7461	1	0	3
6.7566	1	0	3
6.9198	1	0	3
6.2028	1	0	3
5.2521	1	0	3
4.2571	1	0	3
5.5219	1	0	3
3.7985	1	0	3
4.3705	1	0	3
4.6343	1	0	3
2.1149	1	0	3
0.98579	1	0	3
-7.2714	1	0	3
1.0003	1	0	3
5.5374	1	0	3
1.7186	1	0	3
5.252	1	0	3
0.79523	1	0	3
7.2266	1	0	3
6.5057	1	0	3
0.12861	1	0	3
0.97426	1	0	3
0.89768	1	0	3
7.8831	1	0	3
6.802	1	0	3
4.2991	1	0	3
-0.60292	1	0	3
3.5302	1	0	3
3.1784	1	0	3
-0.96047	1	0	3
4.3829	1	0	3
7.3071	1	0	3
5.7919	1	0	3
7.7707	1	0	3
6.6347	1	0	3
6.7524	1	0	3
6.9662	1	0	3
2.9382	1	0	3
5.8652	1	0	3
5.3083	1	0	3
-5.3872	1	0	3
5.236	1	0	3
6.3234	1	0	3
3.0393	1	0	3
4.5206	1	0	3
1.9055	1	0	3
2.776	1	0	3
-0.24335	1	0	3
7.6494	1	0	3
7.6638	1	0	3
7.7404	1	0	3
6.0191	1	0	3
1.9139	1	0	3
4.604	1	0	3
7.2062	1	0	3
6.8285	1	0	3
7.1598	1	0	3
7.263	1	0	3
8.0444	1	0	3
5.7369	1	0	3
5.5702	1	0	3
3.8191	1	0	3
2.5037	1	0	3
6.4716	1	0	3
7.0617	1	0	3
-0.082079	1	0	3
-0.0076782	1	0	3
4.9438	1	0	3
8.1967	1	0	3
8.0433	1	0	3
7.6984	1	0	3
7.4543	1	0	3
3.5504	1	0	3
5.0598	1	0	3
7.2432	1	0	3
5.981	1	0	3
7.1646	1	0	3
7.9126	1	0	3
3.8089	1	0	3
6.9705	1	0	3
7.5821	1	0	3
7.3075	1	0	3
7.4406	1	0	3
6.8349	1	0	3
5.842	1	0	3
7.744	1	0	3
-0.75538	1	0	3
4.1364	1	0	3
7.0787	1	0	3
-0.61021	1	0	3
1.1264	1	0	3
5.748	1	0	3
0.47512	1	0	3
5.6719	1	0	3
7.4486	1	0	3
7.287	1	0	3
6.7693	1	0	3
-6.9709	1	0	3
4.076	1	0	3
6.5153	1	0	3
7.541	1	0	3
6.9927	1	0	3
8.162	1	0	3
7.8763	1	0	3
6.2262	1	0	3
6.8956	1	0	3
6.87	1	0	3
6.8137	1	0	3
7.2061	1	0	3
3.5597	1	0	3
3.2609	1	0	3
-0.74327	1	0	4
-9.9898	1	0	4
0.68936	1	0	4
-9.9979	1	0	4
0.92273	1	0	4
0.49715	1	0	4
4.2619	1	0	4
6.4224	1	0	4
-0.8194	1	0	4
0.13032	1	0	4
-1.8842	1	0	4
0.51888	1	0	4
-4.499	1	0	4
1.3717	1	0	4
5.4605	1	0	4
-2.0908	1	0	4
2.41	1	0	4
2.9888	1	0	4
-5.9802	1	0	4
-3.7435	1	0	4
-4.8094	1	0	4
-9.6739	1	0	4
0.71472	1	0	4
0.43921	1	0	4
-3.1959	1	0	4
3.3434	1	0	4
-5.704	1	0	4
-3.6269	1	0	4
-11.562	1	0	4
-3.1424	1	0	4
3.3527	1	0	4
-11.433	1	0	4
-7.8774	1	0	4
-8.8785	1	0	4
0.34557	1	0	4
4.215	1	0	4
-1.2023	1	0	4
2.1247	1	0	4
2.9493	1	0	4
2.1172	1	0	4
4.3755	1	0	4
6.2444	1	0	4
3.3784	1	0	4
2.6384	1	0	4
2.3476	1	0	4
1.2003	1	0	4
-2.4278	1	0	4
1.8599	1	0	4
5.5225	1	0	4
2.5725	1	0	4
-4.8236	1	0	4
-1.7036	1	0	4
7.8547	1	0	4
3.2571	1	0	4
0.32685	1	0	4
-4.9205	1	0	4
3.5513	1	0	4
3.9412	1	0	4
1.2246	1	0	4
3.4529	1	0	4
-1.3711	1	0	4
-3.2767	1	0	4
-3.3823	1	0	4
-7.5108	1	0	4
-0.042899	1	0	4
-2.1534	1	0	4
1.9011	1	0	4
0.67835	1	0	4
6.2046	1	0	4
5.9285	1	0	4
6.307	1	0	4
0.80756	1	0	4
-1.5389	1	0	4
5.5933	1	0	4
1.9371	1	0	4
4.6589	1	0	4
0.74553	1	0	4
4.4664	1	0	4
-1.3248	1	0	4
-2.1892	1	0	4
2.3337	1	0	4
-2.478	1	0	4
2.781	1	0	4
5.1111	1	0	4
-0.0028154	1	0	4
0.12251	1	0	4
2.2891	1	0	4
1.1694	1	0	4
-0.22122	1	0	4
1.0586	1	0	4
2.4443	1	0	4
-3.0529	1	0	4
3.4157	1	0	4
-0.017567	1	0	4
0.71723	1	0	4
1.1386	1	0	4
-2.5243	1	0	4
0.4254	1	0	4
3.5775	1	0	4
1.8849	1	0	4
0.21643	1	0	4
0.68136	1	0	4
-6.2872	1	0	4
-9.4488	1	0	4
-6.8838	1	0	4
-4.9347	1	0	4
-6.1846	1	0	4
-7.5767	1	0	4
-9.1818	1	0	4
-0.31826	1	0	4
-9.0782	1	0	4
-5.2172	1	0	4
-7.0415	1	0	4
3.6316	1	0	4
0.18616	1	0	4
-5.4053	1	0	4
-3.9697	1	0	4
-0.20849	1	0	4
0.13794	1	0	4
2.8501	1	0	4
-1.5917	1	0	4
-3.6703	1	0	4
-5.4211	1	0	4
1.6249	1	0	4
-2.5209	1	0	4
-6.512	1	0	4
-0.051618	1	0	4
-1.6738	1	0	4
0.50401	1	0	4
1.4944	1	0	4
0.77714	1	0	4
-5.6055	1	0	4
-1.289	1	0	4
-7.0483	1	0	4
-1.9397	1	0	4
2.027	1	0	4
-2.6653	1	0	4
-10.476	1	0	4
1.9661	1	0	4
-1.6964	1	0	4
-2.5815	1	0	4
-3.7777	1	0	4
1.6194	1	0	4
-10.06	1	0	4
1.213	1	0	4
-3.2634	1	0	4
-5.4934	1	0	4
0.45322	1	0	4
-2.7638	1	0	4
-10.977	1	0	4
0.46014	1	0	4
-5.2723	1	0	4
-2.3271	1	0	4
-7.4102	1	0	4
-8.2321	1	0	4
3.5832	1	0	4
-1.5159	1	0	4
-3.5282	1	0	4
0.8753	1	0	4
5.8602	1	0	4
2.2022	1	0	4
3.8333	1	0	4
1.4191	1	0	4
1.2934	1	0	4
-1.2147	1	0	4
-1.1717	1	0	4
1.9637	1	0	4
3.8472	1	0	4
5.0414	1	0	4
5.5565	1	0	4
3.8931	1	0	4
-6.929	1	0	4
4.4283	1	0	4
0.14253	1	0	4
-0.3247	1	0	4
2.8699	1	0	4
-1.9624	1	0	4
5.8076	1	0	4
0.30552	1	0	4
0.31114	1	0	4
-2.6605	1	0	4
2.7179	1	0	4
1.7373	1	0	4
-1.7786	1	0	4
2.4835	1	0	4
-1.3643	1	0	4
1.7288	1	0	4
2.4154	1	0	4
-0.13749	1	0	4
-9.0175	1	0	4
-4.8532	1	0	4
-6.284	1	0	4
-3.6506	1	0	4
-3.6813	1	0	4
0.61451	1	0	5
2.3622	1	0	5
1.9997	1	0	5
8.0326	1	0	5
7.8901	1	0	5
5.1621	1	0	5
7.227	1	0	5
7.2612	1	0	5
1.0402	1	0	5
8.1516	1	0	5
7.202	1	0	5
4.3679	1	0	5
0.73973	1	0	5
6.1878	1	0	5
4.4279	1	0	5
4.3194	1	0	5
-2.2364	1	0	5
4.609	1	0	5
6.0782	1	0	5
7.3027	1	0	5
6.6687	1	0	5
6.894	1	0	5
7.2235	1	0	5
2.8359	1	0	5
7.6686	1	0	5
6.9401	1	0	5
7.1459	1	0	5
2.0488	1	0	5
-2.4613	1	0	5
-0.69247	1	0	5
3.7034	1	0	5
3.3293	1	0	5
7.0976	1	0	5
-2.9805	1	0	5
-2.1586	1	0	5
6.4921	1	0	5
5.2806	1	0	5
8.1878	1	0	5
5.4868	1	0	5
7.8941	1	0	5
7.6647	1	0	5
7.8549	1	0	5
7.0574	1	0	5
3.6893	1	0	5
7.3266	1	0	5
7.8366	1	0	5
7.5258	1	0	5
7.6833	1	0	5
8.0436	1	0	5
7.5325	1	0	5
6.036	1	0	5
7.1787	1	0	5
7.9358	1	0	5
7.7777	1	0	5
7.1637	1	0	5
8.0506	1	0	5
6.6002	1	0	5
7.7952	1	0	5
7.8727	1	0	5
7.8882	1	0	5
6.1657	1	0	5
7.479	1	0	5
8.072	1	0	5
7.4024	1	0	5
7.7845	1	0	5
6.0816	1	0	5
6.032	1	0	5
5.9536	1	0	5
4.0153	1	0	5
6.3672	1	0	5
4.4272	1	0	5
3.404	1	0	5
6.175	1	0	5
7.6728	1	0	5
7.4343	1	0	5
6.155	1	0	5
3.3379	1	0	5
6.8135	1	0	5
7.8804	1	0	5
3.696	1	0	5
5.8039	1	0	5
2.6911	1	0	5
0.51007	1	0	5
0.12202	1	0	5
-4.2146	1	0	5
-1.3692	1	0	5
-1.4975	1	0	5
-3.1477	1	0	5
-0.20263	1	0	5
3.7049	1	0	5
2.9405	1	0	5
6.9721	1	0	5
4.564	1	0	5
7.5711	1	0	5
4.3524	1	0	5
3.1868	1	0	5
4.8151	1	0	5
4.1902	1	0	5
5.5572	1	0	5
5.761	1	0	5
-0.15478	1	0	5
0.8968	1	0	5
5.9902	1	0	5
7.8482	1	0	5
7.6832	1	0	5
6.4913	1	0	5
5.9828	1	0	5
5.9152	1	0	5
7.9049	1	0	5
7.8723	1	0	5
-1.3475	1	0	5
6.5199	1	0	5
3.3403	1	0	5
7.729	1	0	5
6.9079	1	0	5
7.6056	1	0	5
6.7007	1	0	5
7.764	1	0	5
5.1007	1	0	5
1.7985	1	0	5
1.1105	1	0	5
5.0615	1	0	5
5.0351	1	0	5
4.5455	1	0	5
4.1475	1	0	5
-2.2422	1	0	5
1.931	1	0	5
4.7656	1	0	5
7.7392	1	0	5
5.0544	1	0	5
3.4297	1	0	5
4.1394	1	0	5
-0.5441	1	0	5
0.43582	1	0	5
3.2556	1	0	5
3.1796	1	0	5
0.0038408	1	0	5
6.3311	1	0	5
-3.0435	1	0	5
-10.342	1	0	5
6.0279	1	0	5
5.9967	1	0	5
7.4057	1	0	5
7.4094	1	0	5
7.6272	1	0	5
7.0746	1	0	5
-0.77105	1	0	5
5.5437	1	0	5
6.4936	1	0	5
1.9481	1	0	5
4.425	1	0	5
7.6104	1	0	5
7.5502	1	0	5
-6.2393	1	1	1
-11.743	1	1	1
-11.643	1	1	1
-14.453	1	1	1
-11.534	1	1	1
-13.92	1	1	1
-13.047	1	1	1
-10.968	1	1	1
-15.377	1	1	1
-14.605	1	1	1
-12.76	1	1	1
-12.077	1	1	1
-15.901	1	1	1
-12.255	1	1	1
-3.8906	1	1	1
-11.194	1	1	1
0.010355	1	1	1
-6.8655	1	1	1
-10.838	1	1	1
-11.538	1	1	1
-9.6843	1	1	1
-16.975	1	1	1
-11.164	1	1	1
-11.003	1	1	1
-7.5832	1	1	1
-7.1775	1	1	1
-15	1	1	1
-11.537	1	1	1
-10.633	1	1	1
-8.7771	1	1	1
-8.9295	1	1	1
-13.04	1	1	1
-12.681	1	1	1
-11.06	1	1	1
-8.6064	1	1	1
-1.7214	1	1	1
-14.828	1	1	1
-13.497	1	1	1
-11.607	1	1	1
-12.262	1	1	1
-4.825	1	1	1
-5.8058	1	1	1
-12.186	1	1	1
-12.422	1	1	1
-14.966	1	1	1
-15.921	1	1	1
-10.485	1	1	1
-10.07	1	1	1
-15.918	1	1	1
-13.693	1	1	1
-11.787	1	1	1
-7.4855	1	1	1
-0.046008	1	1	1
-13.995	1	1	1
-13.222	1	1	1
-12.465	1	1	1
-10.063	1	1	1
-8.2246	1	1	1
-3.8965	1	1	1
-8.4036	1	1	1
-13.667	1	1	1
-11.798	1	1	1
-6.9163	1	1	1
-4.493	1	1	1
-4.6307	1	1	1
-12.735	1	1	1
-9.7154	1	1	1
-4.8051	1	1	1
-7.1972	1	1	1
-0.22023	1	1	1
2.4884	1	1	1
-0.74	1	1	1
-3.1791	1	1	1
-2.5661	1	1	1
-1.3147	1	1	1
-0.4213	1	1	1
-2.6773	1	1	1
-3.9736	1	1	1
0.041688	1	1	1
0.82332	1	1	1
-4.9559	1	1	1
-6.3396	1	1	1
-5.3712	1	1	1
-6.2131	1	1	1
-3.8755	1	1	1
-4.8642	1	1	1
-2.946	1	1	1
-5.4785	1	1	1
-2.324	1	1	1
-3.681	1	1	1
-7.0348	1	1	1
0.78898	1	1	1
6.4834	1	1	1
4.1589	1	1	1
1.2857	1	1	1
5.1911	1	1	1
5.8843	1	1	1
2.6522	1	1	1
-2.9675	1	1	1
-11.482	1	1	1
-3.6617	1	1	1
-3.1037	1	1	1
-4.1595	1	1	1
-8.4046	1	1	1
-6.9036	1	1	1
6.9966	1	1	1
-2.468	1	1	1
4.0006	1	1	1
-1.1611	1	1	1
1.0051	1	1	1
0.55784	1	1	1
-7.9636	1	1	1
-10.919	1	1	1
-4.2861	1	1	1
0.93503	1	1	1
-10.308	1	1	1
-0.94235	1	1	1
-8.5885	1	1	1
-6.032	1	1	1
-3.8744	1	1	1
-1.9002	1	1	1
-4.5811	1	1	1
-7.1214	1	1	1
-4.9702	1	1	1
-5.4288	1	1	1
-3.2229	1	1	1
-9.2721	1	1	1
-7.5384	1	1	1
-6.1304	1	1	1
-10.69	1	1	1
-7.569	1	1	1
0.83594	1	1	1
-6.8357	1	1	1
-10.614	1	1	1
-8.7311	1	1	1
-12.371	1	1	1
-12.064	1	1	1
-13.229	1	1	1
-13.117	1	1	1
-12.129	1	1	1
-9.7985	1	1	1
-12.467	1	1	1
-10.074	1	1	1
-9.093	1	1	1
-11.203	1	1	1
-7.2308	1	1	1
-7.3171	1	1	1
-2.5475	1	1	1
-6.5362	1	1	1
-3.6664	1	1	1
-4.0351	1	1	1
-2.1505	1	1	1
-5.5139	1	1	1
-1.0942	1	1	1
-2.6802	1	1	1
-1.9305	1	1	1
-2.7137	1	1	1
-1.4042	1	1	1
-0.43946	1	1	1
-12.82	1	1	1
-15.117	1	1	1
-6.2957	1	1	1
-11.64	1	1	1
-14.626	1	1	1
-20.255	1	1	1
-14.46	1	1	1
-15.286	1	1	1
-15.41	1	1	1
-10.02	1	1	1
-13.858	1	1	1
-14.52	1	1	1
-17.325	1	1	1
-15.287	1	1	1
-6.6167	1	1	1
-14.363	1	1	1
-15.243	1	1	1
-8.2398	1	1	1
-8.1956	1	1	1
-15.003	1	1	1
-8.0341	1	1	1
-10.11	1	1	1
-14.115	1	1	1
-11.911	1	1	1
-3.9415	1	1	1
0.049436	1	1	1
-16.766	1	1	1
-10.38	1	1	1
-6.6869	1	1	1
-15.249	1	1	1
-13.097	1	1	1
-12.147	1	1	1
-13.203	1	1	1
-15.222	1	1	1
-17.105	1	1	1
-14.997	1	1	1
-10.84	1	1	1
6.4422	1	1	2
6.1385	1	1	2
-1.4793	1	1	2
-8.2742	1	1	2
-6.1233	1	1	2
-7.8653	1	1	2
-11.405	1	1	2
-3.3223	1	1	2
2.1781	1	1	2
-9.5981	1	1	2
-0.35258	1	1	2
2.3672	1	1	2
6.5408	1	1	2
-6.8469	1	1	2
-9.4279	1	1	2
-12.907	1	1	2
-11.803	1	1	2
-7.5962	1	1	2
-0.47292	1	1	2
5.8213	1	1	2
-0.36479	1	1	2
-7.3781	1	1	2
-10.017	1	1	2
-11.202	1	1	2
-11.828	1	1	2
-8.1216	1	1	2
-11.549	1	1	2
-5.1502	1	1	2
2.1846	1	1	2
-7.785	1	1	2
-10.217	1	1	2
-11.432	1	1	2
-10.427	1	1	2
-16.447	1	1	2
-15.19	1	1	2
-8.5079	1	1	2
-18.169	1	1	2
-8.8288	1	1	2
-8.123	1	1	2
-15.784	1	1	2
-17.599	1	1	2
-16.973	1	1	2
-17.339	1	1	2
-15.845	1	1	2
-18.739	1	1	2
-16.709	1	1	2
-13.194	1	1	2
-13.407	1	1	2
-16.448	1	1	2
-15.107	1	1	2
-15.831	1	1	2
-15.311	1	1	2
-17.891	1	1	2
-17.004	1	1	2
-18.275	1	1	2
-14.101	1	1	2
-17.841	1	1	2
-7.4307	1	1	2
-13.585	1	1	2
-15.718	1	1	2
-18.732	1	1	2
-19.733	1	1	2
-18.621	1	1	2
-17.425	1	1	2
-17.834	1	1	2
-21.185	1	1	2
-18.502	1	1	2
-20.291	1	1	2
-20.843	1	1	2
-15.451	1	1	2
-18.271	1	1	2
-18.344	1	1	2
-21.071	1	1	2
-21.162	1	1	2
-19.407	1	1	2
-16.757	1	1	2
-18.52	1	1	2
-21.125	1	1	2
-14.429	1	1	2
-16.19	1	1	2
-19.478	1	1	2
-10.797	1	1	2
-17.846	1	1	2
-20.159	1	1	2
-17.038	1	1	2
-13.157	1	1	2
-8.5996	1	1	2
-19.228	1	1	2
-18.777	1	1	2
-9.5243	1	1	2
-5.1613	1	1	2
-20.37	1	1	2
-16.534	1	1	2
-15.759	1	1	2
-15.278	1	1	2
-20.126	1	1	2
-20.875	1	1	2
-18.284	1	1	2
-18.624	1	1	2
-12.332	1	1	2
-5.2336	1	1	2
-18.369	1	1	2
-15.227	1	1	2
1.5916	1	1	2
-1.8499	1	1	2
-8.2301	1	1	2
-14.074	1	1	2
0.69942	1	1	2
-2.8144	1	1	2
-6.3362	1	1	2
-5.4581	1	1	2
-2.6861	1	1	2
-10.229	1	1	2
-14.008	1	1	2
-12.532	1	1	2
-6.4744	1	1	2
-4.9269	1	1	2
-3.856	1	1	2
-8.6373	1	1	2
-12.801	1	1	2
-7.2467	1	1	2
-5.8156	1	1	2
-9.9281	1	1	2
-13.798	1	1	2
-20.165	1	1	2
-19.661	1	1	2
-16.179	1	1	2
-16.059	1	1	2
-14.264	1	1	2
-11.983	1	1	2
-8.3871	1	1	2
-5.025	1	1	2
-18.923	1	1	2
-13.623	1	1	2
-14.7	1	1	2
-17.176	1	1	2
-13.994	1	1	2
-13.575	1	1	2
-11.971	1	1	2
-9.4793	1	1	2
-14.722	1	1	2
-15.297	1	1	2
-16.784	1	1	2
-15.559	1	1	2
-14.34	1	1	2
-12.139	1	1	2
-13.874	1	1	2
-8.4572	1	1	2
-9.7266	1	1	2
-9.8336	1	1	2
-13.684	1	1	2
-11.236	1	1	2
-15.757	1	1	2
-13.781	1	1	2
-10.029	1	1	2
-9.4386	1	1	2
-13.911	1	1	2
-12.649	1	1	2
-11.303	1	1	2
-14.511	1	1	2
-10.085	1	1	2
-12.11	1	1	2
-14.285	1	1	2
-14.991	1	1	2
-16.695	1	1	2
-15.527	1	1	2
-15.27	1	1	2
-14.333	1	1	2
-11.421	1	1	2
-11.609	1	1	2
-12.609	1	1	2
-13.054	1	1	2
-15.528	1	1	2
-11.208	1	1	2
-11.374	1	1	2
-15.352	1	1	2
-14.852	1	1	2
-12.446	1	1	2
-10.015	1	1	2
-15.617	1	1	2
-9.539	1	1	2
-15.87	1	1	2
-14.441	1	1	2
-12.639	1	1	2
-15.56	1	1	2
-11.062	1	1	2
-15.383	1	1	2
-12.205	1	1	2
-15.948	1	1	2
-14.504	1	1	2
-10.253	1	1	2
-14.693	1	1	2
-12.756	1	1	2
-15.324	1	1	2
-11.158	1	1	2
-8.7233	1	1	2
-17.09	1	1	2
-16.729	1	1	2
-12.954	1	1	2
-14.079	1	1	2
-12.92	1	1	2
-14.632	1	1	2
-15.495	1	1	2
-13.336	1	1	2
-15.007	1	1	2
-8.9416	1	1	2
-16.144	1	1	2
-12.995	1	1	2
-10.112	1	1	2
-12.41	1	1	2
-15.905	1	1	2
-15.862	1	1	2
-15.034	1	1	2
-16.084	1	1	2
-16.372	1	1	2
-13.133	1	1	2
-12.711	1	1	2
-13.402	1	1	2
-12.69	1	1	2
-13.13	1	1	2
-12.785	1	1	2
-14.412	1	1	2
-13.249	1	1	2
-8.9946	1	1	2
-11.262	1	1	2
-8.9045	1	1	2
-14.93	1	1	2
-13.065	1	1	2
-2.4759	1	1	2
-9.2219	1	1	2
-12.831	1	1	2
-1.7623	1	1	2
-7.8199	1	1	2
3.5878	1	1	2
-1.6676	1	1	2
-13.2	1	1	2
-15.839	1	1	2
-5.9251	1	1	2
-14.193	1	1	2
-12.997	1	1	2
-5.9803	1	1	2
-8.8929	1	1	2
-8.3726	1	1	2
-12.524	1	1	2
-12.237	1	1	2
-13.774	1	1	2
-5.615	1	1	2
-0.35249	1	1	2
-12.348	1	1	2
-6.6487	1	1	2
-4.9742	1	1	2
-2.1171	1	1	2
-1.8566	1	1	2
-7.0939	1	1	2
-15.4	1	1	2
-2.6376	1	1	2
-2.9651	1	1	2
-5.6267	1	1	2
-12.826	1	1	2
-15.035	1	1	2
-14.312	1	1	2
-10.006	1	1	2
-11.054	1	1	2
-13.863	1	1	2
-4.2132	1	1	2
-12.507	1	1	2
-13.728	1	1	2
-5.7239	1	1	2
-16.727	1	1	2
-11.851	1	1	2
-10.487	1	1	2
-2.431	1	1	2
-17.299	1	1	2
-10.311	1	1	2
-1.1127	1	1	2
-4.2348	1	1	2
-4.092	1	1	2
-17.8	1	1	2
-1.0539	1	1	2
-12.666	1	1	2
-2.4496	1	1	2
2.4791	1	1	2
-5.8674	1	1	2
-15.911	1	1	2
-13.165	1	1	2
-11.201	1	1	2
-3.3237	1	1	2
-14.824	1	1	2
0.14794	1	1	2
-9.1653	1	1	2
-13.23	1	1	2
-8.522	1	1	2
-14.301	1	1	2
-13.064	1	1	2
-7.3598	1	1	2
-5.4778	1	1	2
-9.3082	1	1	2
-5.7666	1	1	2
-15.098	1	1	2
-10.461	1	1	2
-9.5049	1	1	2
-12.607	1	1	2
-13.942	1	1	2
-13.973	1	1	2
-8.3713	1	1	2
-9.8192	1	1	2
-9.8014	1	1	2
-13.674	1	1	2
-13.442	1	1	2
-5.1329	1	1	2
0.096872	1	1	2
-13.367	1	1	2
-12.651	1	1	2
-13.11	1	1	2
-1.7853	1	1	2
-16.806	1	1	2
-15.451	1	1	2
-7.8994	1	1	2
-0.24224	1	1	2
-6.4042	1	1	2
3.5478	1	1	2
-10.442	1	1	2
-13.26	1	1	2
-13.885	1	1	2
-15.406	1	1	2
-1.2416	1	1	2
-14.037	1	1	2
-12.192	1	1	2
-6.3419	1	1	2
-16.989	1	1	2
-10.231	1	1	2
-15.803	1	1	2
-14.837	1	1	2
-15.911	1	1	2
-7.0969	1	1	2
-14.198	1	1	2
-13.917	1	1	2
-11.952	1	1	2
-13.56	1	1	2
-14.735	1	1	2
-15.999	1	1	2
-12.875	1	1	2
-2.678	1	1	2
-14.145	1	1	2
-10.339	1	1	2
-12.528	1	1	2
-9.9417	1	1	2
-15.757	1	1	2
-14.964	1	1	2
-15.419	1	1	2
-14.44	1	1	2
-15.642	1	1	2
-3.919	1	1	2
-16.29	1	1	2
-11.613	1	1	2
-5.583	1	1	2
-10.827	1	1	2
-6.7478	1	1	2
-11.645	1	1	2
-10.748	1	1	2
1.0795	1	1	2
0.72016	1	1	2
-3.5896	1	1	2
-3.635	1	1	2
-7.5326	1	1	2
-13.007	1	1	2
-13.21	1	1	2
-0.52308	1	1	2
-4.6931	1	1	2
-7.6478	1	1	2
-10.841	1	1	2
3.2361	1	1	2
-1.9169	1	1	2
-10.966	1	1	2
-12.696	1	1	2
-16.084	1	1	2
-11.208	1	1	2
-15.838	1	1	2
-16.029	1	1	2
3.0904	1	1	2
-4.6216	1	1	2
-18.34	1	1	2
-15.439	1	1	2
-14.395	1	1	2
-3.9809	1	1	2
-0.10142	1	1	2
-14.221	1	1	2
-15.875	1	1	2
-12.907	1	1	2
-9.613	1	1	2
-15.914	1	1	2
-5.546	1	1	2
1.1914	1	1	2
0.95133	1	1	2
-0.13926	1	1	2
-9.9052	1	1	2
-9.3569	1	1	2
-5.1315	1	1	2
-2.1038	1	1	3
1.7443	1	1	3
-4.9079	1	1	3
0.69341	1	1	3
-3.3157	1	1	3
-0.18984	1	1	3
-0.41241	1	1	3
4.3797	1	1	3
4.1836	1	1	3
-6.0862	1	1	3
-3.8587	1	1	3
-1.6646	1	1	3
1.9243	1	1	3
-5.1477	1	1	3
-13.695	1	1	3
-9.5261	1	1	3
-13.027	1	1	3
-13.805	1	1	3
-10.271	1	1	3
-11.878	1	1	3
-14.532	1	1	3
-13.15	1	1	3
-0.053346	1	1	3
-4.4361	1	1	3
-3.4343	1	1	3
-7.0549	1	1	3
-2.9827	1	1	3
-5.262	1	1	3
-6.8703	1	1	3
-5.8764	1	1	3
-6.0757	1	1	3
-6.1174	1	1	3
-8.8269	1	1	3
-2.2019	1	1	3
-8.0294	1	1	3
-13.251	1	1	3
-4.0487	1	1	3
-1.84	1	1	3
-6.4089	1	1	3
-9.1795	1	1	3
-9.2627	1	1	3
-5.2833	1	1	3
-6.8901	1	1	3
-4.4412	1	1	3
-11.079	1	1	3
-8.5583	1	1	3
-10.437	1	1	3
-9.5999	1	1	3
-10.764	1	1	3
-11.94	1	1	3
-11.307	1	1	3
-8.573	1	1	3
-9.8527	1	1	3
-5.8939	1	1	3
-9.2022	1	1	3
-8.1558	1	1	3
-10.829	1	1	3
-10.559	1	1	3
-6.9255	1	1	3
-11.5	1	1	3
-10.037	1	1	3
-5.9747	1	1	3
-8.5964	1	1	3
-6.8008	1	1	3
-7.0965	1	1	3
-15.181	1	1	3
-12.534	1	1	3
-9.5079	1	1	3
-10.751	1	1	3
-14.471	1	1	3
-11.697	1	1	3
-11.918	1	1	3
-13.439	1	1	3
-9.702	1	1	3
-13.612	1	1	3
-15.149	1	1	3
-15.54	1	1	3
-16.402	1	1	3
-13.639	1	1	3
-11.468	1	1	3
-15.617	1	1	3
-15.774	1	1	3
-17.985	1	1	3
-18.234	1	1	3
-14.731	1	1	3
-16.123	1	1	3
-13.972	1	1	3
-13.154	1	1	3
-14.132	1	1	3
[truncated: 16,203 more rows]
