# Supplementary material for: Breakdown of local information processing may underlie isoflurane anesthesia effects
Source: PLoS Comput Biol. 2017 Jun 1;13(6):e1005511. doi: 10.1371/journal.pcbi.1005511 (PMC5453425; doi:10.1371/journal.pcbi.1005511)
Supplement: S1 Dataset — (ZIP) [file pcbi.1005511.s001.zip › ferret_2_h_ksg_raw_median.csv]

raw data	data z_scored	factor direction	factor anesthesia
-2.9434	1.3572	1	1
-3.6028	1.2841	1	1
6.3691	2.3899	1	1
0.14023	1.6992	1	1
5.9902	2.3479	1	1
-8.4041	0.7516	2	1
-12.65	0.28074	2	1
-12.718	0.27316	2	1
-11.672	0.38916	2	1
-13.524	0.18376	2	1
-6.8244	0.92679	1	2
-11.738	0.38189	1	2
-6.9383	0.91416	1	2
-7.6346	0.83694	1	2
-5.0021	1.1289	1	2
-6.6673	0.94421	1	2
-17.062	-0.20857	2	2
-19.21	-0.44671	2	2
-15.156	0.002869	2	2
-14.841	0.03775	2	2
-12.393	0.30928	2	2
-15.815	-0.070213	2	2
-25.602	-1.1556	1	3
-20.087	-0.54396	1	3
-9.0455	0.68047	1	3
-9.8609	0.59005	1	3
-9.4489	0.63573	1	3
-24.087	-0.98755	1	3
-17.418	-0.24802	1	3
-25.596	-1.1549	1	3
-27.532	-1.3697	1	3
-27.915	-1.4121	1	3
-26.777	-1.2859	1	3
-22.654	-0.82873	2	3
-20.356	-0.57379	2	3
-19.321	-0.45901	2	3
-21.366	-0.68583	2	3
-21.355	-0.6846	2	3
-23.611	-0.9348	2	3
-22.967	-0.86335	2	3
-24.616	-1.0463	2	3
-25.409	-1.1342	2	3
-25.37	-1.1299	2	3
-25.298	-1.122	2	3
