# Supplementary material for: Breakdown of local information processing may underlie isoflurane anesthesia effects
Source: PLoS Comput Biol. 2017 Jun 1;13(6):e1005511. doi: 10.1371/journal.pcbi.1005511 (PMC5453425; doi:10.1371/journal.pcbi.1005511)
Supplement: S1 Dataset — (ZIP) [file pcbi.1005511.s001.zip › ferret_2_h_nsb_mean_param_interaction.csv]

mean PFC	sem PFC	mean V1	sem V1
14.347	0.21922	17.35	0.82418
14.572	0.10012	15.632	0.21135
13.596	0.14401	14.699	0.80639
