# Supplementary material for: Breakdown of local information processing may underlie isoflurane anesthesia effects
Source: PLoS Comput Biol. 2017 Jun 1;13(6):e1005511. doi: 10.1371/journal.pcbi.1005511 (PMC5453425; doi:10.1371/journal.pcbi.1005511)
Supplement: S1 Dataset — (ZIP) [file pcbi.1005511.s001.zip › ferret_2_h_nsb_raw_mean.csv]

raw data	factor direction	factor anesthesia
14.544	1	1
14.87	1	1
14.039	1	1
13.936	1	1
15.789	2	1
19.456	2	1
16.326	2	1
17.83	2	1
14.309	1	2
14.635	1	2
14.789	1	2
14.554	1	2
15.474	2	2
15.395	2	2
15.395	2	2
16.263	2	2
13.23	1	3
13.935	1	3
13.61	1	3
13.61	1	3
12.281	2	3
15.571	2	3
15.435	2	3
15.508	2	3
