# Supplementary material for: Breakdown of local information processing may underlie isoflurane anesthesia effects
Source: PLoS Comput Biol. 2017 Jun 1;13(6):e1005511. doi: 10.1371/journal.pcbi.1005511 (PMC5453425; doi:10.1371/journal.pcbi.1005511)
Supplement: S1 Dataset — (ZIP) [file pcbi.1005511.s001.zip › ferret_2_te_ksg_median_param_interaction.csv]

mean FB	sem FB	mean FF	sem FF
1.3576	0.070992	0.97673	0.34336
0.42055	0.2188	0.32942	0.090369
-0.94603	0.13953	-0.52409	0.27229
