# Supplementary material for: Breakdown of local information processing may underlie isoflurane anesthesia effects
Source: PLoS Comput Biol. 2017 Jun 1;13(6):e1005511. doi: 10.1371/journal.pcbi.1005511 (PMC5453425; doi:10.1371/journal.pcbi.1005511)
Supplement: S1 Dataset — (ZIP) [file pcbi.1005511.s001.zip › ferret_2_te_ksg_raw_lmm.csv]

raw data	factor anesthesia	factor direction	factor recording
-0.017858	1	0	1
-0.019006	1	0	1
-0.021746	1	0	1
-0.030945	1	0	1
-0.017741	1	0	1
-0.029618	1	0	1
-0.022041	1	0	1
-0.018375	1	0	1
-0.017726	1	0	1
-0.032033	1	0	1
-0.029635	1	0	1
-0.031344	1	0	1
-0.022986	1	0	1
-0.014371	1	0	1
-0.015134	1	0	1
-0.025298	1	0	1
-0.015702	1	0	1
-0.011554	1	0	1
-0.036229	1	0	1
-0.014358	1	0	1
-0.019656	1	0	1
-0.02203	1	0	1
-0.0085929	1	0	1
-0.028945	1	0	1
-0.0066567	1	0	1
-0.018885	1	0	1
-0.0076729	1	0	1
-0.030188	1	0	1
-0.020951	1	0	1
-0.024024	1	0	1
-0.026592	1	0	1
-0.018557	1	0	1
-0.019053	1	0	1
-0.014433	1	0	1
-0.014327	1	0	1
-0.01907	1	0	1
-0.040813	1	0	1
-0.024914	1	0	1
-0.023931	1	0	1
-0.010942	1	0	1
-0.03018	1	0	1
-0.017473	1	0	1
-0.034848	1	0	1
-0.044549	1	0	1
-0.030751	1	0	1
-0.031602	1	0	1
-0.014025	1	0	1
-0.032884	1	0	1
-0.023978	1	0	1
-0.018888	1	0	1
-0.00891	1	0	1
-0.0197	1	0	1
-0.0095977	1	0	1
-0.021475	1	0	1
-0.025321	1	0	1
-0.018725	1	0	1
-0.019201	1	0	1
-0.030587	1	0	1
-0.038019	1	0	1
-0.016425	1	0	1
-0.043782	1	0	1
-0.012774	1	0	1
-0.026911	1	0	1
-0.024776	1	0	1
-0.022472	1	0	1
-0.028867	1	0	1
-0.039812	1	0	1
-0.034745	1	0	1
-0.026885	1	0	1
-0.02687	1	0	1
-0.024584	1	0	1
-0.020817	1	0	1
-0.015884	1	0	1
-0.0137	1	0	1
-0.023843	1	0	1
-0.019694	1	0	1
-0.034058	1	0	1
-0.019864	1	0	1
-0.019644	1	0	1
-0.01752	1	0	1
-0.016915	1	0	1
-0.031616	1	0	1
-0.018546	1	0	1
-0.018278	1	0	1
-0.022755	1	0	1
-0.017949	1	0	1
-0.015316	1	0	1
-0.023173	1	0	1
-0.024682	1	0	1
-0.017449	1	0	1
-0.02481	1	0	1
-0.012614	1	0	1
-0.012513	1	0	1
-0.012729	1	0	1
-0.0074413	1	0	1
-0.010817	1	0	1
-0.025194	1	0	1
-0.028908	1	0	1
-0.024172	1	0	1
-0.045872	1	0	1
-0.012638	1	0	1
-0.0064034	1	0	1
-0.019959	1	0	1
-0.004514	1	0	1
-0.015496	1	0	1
-0.0098639	1	0	1
-0.008278	1	0	1
-0.022107	1	0	1
-0.020722	1	0	1
-0.02489	1	0	1
-0.015445	1	0	1
-0.032049	1	0	1
-0.013956	1	0	1
-0.019307	1	0	1
-0.024581	1	0	1
-0.037082	1	0	1
-0.026016	1	0	1
-0.021571	1	0	1
-0.030954	1	0	1
-0.016125	1	0	1
-0.019567	1	0	1
-0.024868	1	0	1
-0.010265	1	0	1
-0.01031	1	0	1
-0.011375	1	0	1
-0.012757	1	0	1
-0.010275	1	0	1
-0.020868	1	0	1
-0.0093419	1	0	1
-0.01829	1	0	1
-0.011007	1	0	1
-0.011029	1	0	1
-0.019463	1	0	1
-0.019078	1	0	1
-0.013968	1	0	1
-0.020016	1	0	1
-0.013623	1	0	1
-0.022763	1	0	1
-0.01127	1	0	1
-0.0089098	1	0	1
-0.015799	1	0	1
-0.025925	1	0	1
-0.020102	1	0	1
-0.025865	1	0	1
-0.047489	1	0	1
-0.015768	1	0	1
-0.026645	1	0	1
-0.025374	1	0	1
-0.020946	1	0	1
-0.018065	1	0	1
-0.017819	1	0	1
-0.013875	1	0	1
-0.020774	1	0	1
-0.03034	1	0	1
-0.022127	1	0	1
-0.020381	1	0	1
-0.014652	1	0	1
-0.022499	1	0	1
-0.023622	1	0	1
-0.023364	1	0	1
-0.014471	1	0	1
-0.022117	1	0	1
-0.038297	1	0	1
-0.044909	1	0	1
-0.020193	1	0	1
-0.023295	1	0	1
-0.017509	1	0	1
-0.02939	1	0	1
-0.014129	1	0	1
-0.030053	1	0	1
-0.038747	1	0	1
-0.03358	1	0	1
-0.026593	1	0	1
-0.013245	1	0	1
-0.035424	1	0	1
-0.010352	1	0	1
-0.023695	1	0	1
-0.011362	1	0	1
-0.01592	1	0	1
-0.018988	1	0	1
-0.011645	1	0	1
-0.016342	1	0	1
-0.015587	1	0	1
-0.023007	1	0	1
-0.032869	1	0	1
-0.021889	1	0	1
-0.028727	1	0	1
-0.028701	1	0	1
-0.023064	1	0	1
-0.033232	1	0	1
-0.0093566	1	0	1
-0.02302	1	0	1
-0.011081	1	0	1
-0.032402	1	0	1
-0.018818	1	0	1
-0.018253	1	0	1
-0.010398	1	0	2
-0.017275	1	0	2
-0.012792	1	0	2
-0.024506	1	0	2
-0.018384	1	0	2
-0.024316	1	0	2
-0.025674	1	0	2
-0.025544	1	0	2
-0.010452	1	0	2
-0.021666	1	0	2
0.0059657	1	0	2
-0.0086052	1	0	2
-0.011334	1	0	2
-0.012062	1	0	2
-0.025594	1	0	2
-0.0084099	1	0	2
-0.025694	1	0	2
-0.024179	1	0	2
-0.012731	1	0	2
-0.039965	1	0	2
-0.016015	1	0	2
-0.02747	1	0	2
-0.022662	1	0	2
-0.028322	1	0	2
-0.015398	1	0	2
-0.0054315	1	0	2
-0.022574	1	0	2
-0.01918	1	0	2
-0.014924	1	0	2
-0.022028	1	0	2
-0.02541	1	0	2
-0.013747	1	0	2
-0.018569	1	0	2
-0.0024446	1	0	2
-0.022702	1	0	2
-0.022573	1	0	2
-0.012191	1	0	2
-0.017269	1	0	2
-0.014638	1	0	2
-0.022633	1	0	2
-0.014417	1	0	2
-0.024131	1	0	2
-0.01584	1	0	2
-0.0095664	1	0	2
-0.027356	1	0	2
-0.020811	1	0	2
-0.030012	1	0	2
-0.02194	1	0	2
-0.019345	1	0	2
-0.020358	1	0	2
-0.040154	1	0	2
-0.012829	1	0	2
-0.021299	1	0	2
-0.011733	1	0	2
-0.013931	1	0	2
-0.018092	1	0	2
-0.012578	1	0	2
-0.022002	1	0	2
-0.016628	1	0	2
-0.023552	1	0	2
-0.007924	1	0	2
-0.02346	1	0	2
-0.011994	1	0	2
-0.023258	1	0	2
-0.022063	1	0	2
-0.02716	1	0	2
-0.014404	1	0	2
-0.022153	1	0	2
-0.017169	1	0	2
-0.018849	1	0	2
-0.017206	1	0	2
-0.018597	1	0	2
-0.024995	1	0	2
-0.01328	1	0	2
-0.025393	1	0	2
-0.034114	1	0	2
-0.015671	1	0	2
-0.028444	1	0	2
-0.011793	1	0	2
-0.02557	1	0	2
-0.02631	1	0	2
-0.0024471	1	0	2
-0.023544	1	0	2
-0.013422	1	0	2
-0.0093172	1	0	2
-0.012458	1	0	2
-0.019359	1	0	2
-0.032781	1	0	2
-0.017879	1	0	2
-0.003682	1	0	2
-0.022871	1	0	2
-0.017247	1	0	2
-0.027784	1	0	2
-0.022373	1	0	2
-0.020446	1	0	2
-0.021654	1	0	2
-0.018138	1	0	2
-0.020405	1	0	2
-0.010304	1	0	2
-0.011167	1	0	2
-0.0049636	1	0	2
-0.01019	1	0	2
-0.022079	1	0	2
-0.0089333	1	0	2
-0.01901	1	0	2
-0.037152	1	0	2
-0.021378	1	0	2
-0.013052	1	0	2
-0.019466	1	0	2
-0.01966	1	0	2
-0.039295	1	0	2
-0.029529	1	0	2
-0.036642	1	0	2
-0.018927	1	0	2
-0.0052506	1	0	2
-0.02389	1	0	2
-0.012969	1	0	2
-0.027745	1	0	2
-0.019949	1	0	2
-0.018736	1	0	2
-0.019468	1	0	2
-0.016908	1	0	2
-0.018216	1	0	2
-0.017833	1	0	2
-0.020722	1	0	2
-0.02257	1	0	2
-0.01102	1	0	2
-0.0068654	1	0	2
-0.021702	1	0	2
-0.007489	1	0	2
-0.017522	1	0	2
-0.031737	1	0	2
-0.020242	1	0	2
-0.027027	1	0	2
-0.019109	1	0	2
-0.015669	1	0	2
-0.016647	1	0	2
-0.025421	1	0	2
-0.016619	1	0	2
-0.022253	1	0	2
-0.018777	1	0	2
-0.023916	1	0	2
-0.015777	1	0	2
-0.0075963	1	0	2
-0.014144	1	0	2
-0.031676	1	0	2
-0.0087247	1	0	2
-0.02072	1	0	2
-0.026464	1	0	2
-0.0051174	1	0	2
-0.035895	1	0	2
-0.013507	1	0	2
-0.015504	1	0	2
-0.026094	1	0	2
-0.029182	1	0	2
-0.010042	1	0	2
-0.013227	1	0	2
-0.01955	1	0	2
-0.011657	1	0	2
-0.026834	1	0	2
-0.029645	1	0	2
-0.016554	1	0	2
-0.016817	1	0	2
-0.013631	1	0	2
-0.027592	1	0	2
-0.0068673	1	0	2
-0.01507	1	0	2
-0.014105	1	0	2
-0.018109	1	0	2
-0.022821	1	0	2
-0.016386	1	0	2
-0.020317	1	0	2
-0.021211	1	0	2
-0.029988	1	0	2
-0.022325	1	0	2
-0.024513	1	0	2
-0.017481	1	0	2
-0.021976	1	0	2
-0.012891	1	0	2
-0.021767	1	0	2
-0.012338	1	0	2
-0.039498	1	0	2
-0.015547	1	0	2
-0.014708	1	0	2
-0.0085395	1	0	2
-0.0074703	1	0	2
-0.026599	1	0	2
-0.011946	1	0	2
-0.042841	1	0	2
-0.010183	1	0	2
-0.01113	1	0	2
-0.022197	1	0	2
-0.018455	1	0	2
-0.024086	1	0	2
-0.027008	1	0	2
-0.016628	1	0	2
-0.02201	1	0	2
-0.030613	1	0	2
-0.013812	1	0	2
-0.013079	1	0	2
-0.009509	1	0	2
-0.016354	1	0	2
-0.016253	1	0	2
-0.01349	1	0	2
-0.020748	1	0	2
-0.024697	1	0	2
-0.015172	1	0	2
-0.021854	1	0	2
-0.021673	1	0	2
-0.012561	1	0	2
-0.017223	1	0	2
-0.0181	1	0	2
-0.015555	1	0	2
-0.024552	1	0	2
-0.029286	1	0	2
-0.02435	1	0	2
-0.027219	1	0	2
-0.0072798	1	0	2
-0.027447	1	0	2
-0.013761	1	0	2
-0.029528	1	0	2
-0.015591	1	0	2
-0.026122	1	0	2
-0.022858	1	0	2
-0.015601	1	0	2
-0.020425	1	0	2
-0.0052456	1	0	2
-0.019327	1	0	2
-0.009544	1	0	2
-0.024199	1	0	2
-0.0065825	1	0	2
-0.033245	1	0	2
-0.02231	1	0	2
-0.021299	1	0	2
-0.037807	1	0	2
-0.030121	1	0	2
0.00083904	1	0	2
-0.013604	1	0	2
-0.018363	1	0	2
-0.0047311	1	0	2
-0.023275	1	0	2
-0.017648	1	0	2
-0.01804	1	0	2
-0.018769	1	0	2
-0.014178	1	0	2
-0.022447	1	0	2
-0.027384	1	0	2
-3.1948e-06	1	0	2
-0.010835	1	0	2
-0.023765	1	0	2
-0.013637	1	0	2
-0.016466	1	0	2
-0.015837	1	0	2
-0.036401	1	0	2
-0.0033072	1	0	2
-0.022633	1	0	2
-0.006444	1	0	2
-0.0053993	1	0	2
-0.029893	1	0	2
-0.012493	1	0	2
-0.023098	1	0	2
-0.014477	1	0	2
-5.6799e-05	1	0	2
-0.015979	1	0	2
-0.014061	1	0	2
-0.023771	1	0	2
-0.012302	1	0	2
-0.03379	1	0	2
-0.017573	1	0	2
-0.02534	1	0	2
-0.021588	1	0	2
-0.034204	1	0	2
-0.018174	1	0	2
-0.0099529	1	0	2
-0.013391	1	0	2
-0.031873	1	0	2
-0.025123	1	0	2
-0.010053	1	0	2
-0.020809	1	0	2
-0.010483	1	0	2
-0.015922	1	0	2
-0.010415	1	0	2
-0.018671	1	0	2
-0.024274	1	0	2
-0.002694	1	0	2
-0.018639	1	0	2
-0.03921	1	0	2
-0.034812	1	0	2
-0.019183	1	0	2
-0.012839	1	0	2
-0.02286	1	0	2
-0.013373	1	0	2
-0.020918	1	0	2
-0.018281	1	0	2
-0.0212	1	0	2
-0.022402	1	0	2
-0.028235	1	0	2
-0.015318	1	0	2
-0.013282	1	0	2
-0.019437	1	0	2
-0.011889	1	0	2
-0.021982	1	0	2
-0.012427	1	0	2
-0.023195	1	0	2
-0.014775	1	0	2
-0.010646	1	0	2
-0.017942	1	0	2
-0.010398	1	0	2
-0.015543	1	0	2
-0.018384	1	0	2
-0.011208	1	0	2
-0.022903	1	0	2
-0.018587	1	0	2
-0.017554	1	0	2
-0.018062	1	0	2
-0.030086	1	0	2
-0.0083386	1	0	2
-0.011375	1	0	2
-0.022006	1	0	2
-0.022597	1	0	2
-0.019592	1	0	2
-0.014866	1	0	2
-0.0060087	1	0	2
-0.013903	1	0	2
-0.014246	1	0	2
-0.0074	1	0	2
-0.034653	1	0	2
-0.018628	1	0	2
-0.015271	1	0	2
-0.014573	1	0	2
-0.015969	1	0	2
-0.016554	1	0	2
-0.0098095	1	0	2
-0.0088706	1	0	2
-0.011676	1	0	2
-0.020694	1	0	2
-0.026895	1	0	2
-0.015907	1	0	2
-0.029047	1	0	2
-0.019089	1	0	2
-0.025281	1	0	2
-0.0089197	1	0	2
-0.024053	1	0	2
-0.022664	1	0	2
-0.025002	1	0	2
-0.023802	1	0	2
-0.025076	1	0	2
-0.023171	1	0	2
-0.017277	1	0	2
-0.0098777	1	0	2
-0.015527	1	0	2
-0.020375	1	0	2
-0.015192	1	0	2
-0.030824	1	0	2
-0.012821	1	0	2
-0.017152	1	0	2
-0.034904	1	0	2
-0.011521	1	0	2
-0.02669	1	0	2
-0.015569	1	0	2
-0.013963	1	0	2
-0.0071784	1	0	2
-0.011854	1	0	2
-0.018345	1	0	2
-0.01576	1	0	2
-0.032005	1	0	2
-0.023957	1	0	2
-0.015719	1	0	2
-0.020911	1	0	2
-0.020987	1	0	2
-0.020248	1	0	2
-0.020246	1	0	2
-0.025214	1	0	2
-0.026157	1	0	2
-0.016772	1	0	2
-0.019458	1	0	2
-0.018714	1	0	2
-0.030731	1	0	2
-0.021184	1	0	2
-0.031767	1	0	2
-0.026014	1	0	2
-0.024626	1	0	2
-0.015542	1	0	2
-0.022102	1	0	2
-0.019895	1	0	2
-0.020529	1	0	2
-0.021361	1	0	2
-0.027615	1	0	2
-0.030583	1	0	2
-0.011947	1	0	2
-0.016649	1	0	2
-0.013725	1	0	2
-0.0098358	1	0	2
-0.017697	1	0	2
-0.0070732	1	0	2
-0.0174	1	0	2
-0.013825	1	0	2
-0.033235	1	0	2
-0.0063205	1	0	3
-0.014067	1	0	3
-0.011086	1	0	3
-0.0046393	1	0	3
-0.015423	1	0	3
-0.01024	1	0	3
-0.030229	1	0	3
-0.013215	1	0	3
-0.030692	1	0	3
-0.020938	1	0	3
-0.018212	1	0	3
-0.063278	1	0	3
-0.02562	1	0	3
-0.039311	1	0	3
-0.019401	1	0	3
-0.0213	1	0	3
-0.0092454	1	0	3
-0.016933	1	0	3
-0.018569	1	0	3
-0.027532	1	0	3
-0.0090264	1	0	3
-0.0086298	1	0	3
-0.02425	1	0	3
-0.025184	1	0	3
-0.0037628	1	0	3
-0.029841	1	0	3
-0.02248	1	0	3
-0.023435	1	0	3
-0.017709	1	0	3
-0.0049152	1	0	3
-0.019613	1	0	3
-0.017976	1	0	3
-0.014789	1	0	3
-0.0072981	1	0	3
-0.02225	1	0	3
-0.016938	1	0	3
-0.019071	1	0	3
-0.0064894	1	0	3
-0.0096288	1	0	3
-0.034993	1	0	3
-0.029659	1	0	3
-0.02133	1	0	3
-0.024533	1	0	3
-0.020739	1	0	3
-0.025258	1	0	3
-0.015022	1	0	3
-0.012601	1	0	3
-0.024357	1	0	3
-0.019738	1	0	3
-0.028655	1	0	3
-0.011983	1	0	3
-0.029532	1	0	3
-0.026357	1	0	3
-0.037355	1	0	3
-0.026525	1	0	3
-0.026943	1	0	3
-0.026359	1	0	3
-0.02742	1	0	3
-0.02729	1	0	3
-0.036289	1	0	3
-0.015656	1	0	3
-0.032783	1	0	3
-0.022594	1	0	3
-0.020015	1	0	3
-0.018229	1	0	3
-0.032317	1	0	3
-0.025224	1	0	3
-0.017021	1	0	3
-0.012724	1	0	3
-0.039912	1	0	3
-0.035088	1	0	3
-0.01854	1	0	3
-0.019311	1	0	3
-0.022077	1	0	3
-0.017881	1	0	3
-0.018483	1	0	3
-0.029068	1	0	3
-0.020866	1	0	3
-0.025667	1	0	3
-0.021432	1	0	3
-0.035187	1	0	3
-0.019863	1	0	3
-0.036347	1	0	3
-0.023713	1	0	3
-0.015538	1	0	3
-0.022926	1	0	3
-0.024226	1	0	3
-0.022974	1	0	3
-0.016783	1	0	3
-0.014345	1	0	3
-0.033196	1	0	3
-0.028199	1	0	3
-0.0096318	1	0	3
-0.009884	1	0	3
-0.012645	1	0	3
-0.029308	1	0	3
-0.021914	1	0	3
-0.012391	1	0	3
-0.023172	1	0	3
-0.037616	1	0	3
-0.0078445	1	0	3
-0.035821	1	0	3
-0.020443	1	0	3
-0.02856	1	0	3
-0.030435	1	0	3
-0.04684	1	0	3
-0.012121	1	0	3
-0.029844	1	0	3
-0.024821	1	0	3
-0.0087549	1	0	3
-0.0085523	1	0	3
-0.039176	1	0	3
-0.020814	1	0	3
-0.024832	1	0	3
-0.024858	1	0	3
-0.020807	1	0	3
-0.031172	1	0	3
-0.036732	1	0	3
-0.02719	1	0	3
-0.036795	1	0	3
-0.042969	1	0	3
-0.024195	1	0	3
-0.014701	1	0	3
-0.010382	1	0	3
-0.028554	1	0	3
-0.027398	1	0	3
-0.015916	1	0	3
-0.032802	1	0	3
-0.015548	1	0	3
-0.0081854	1	0	3
-0.018763	1	0	3
-0.023966	1	0	3
-0.042005	1	0	3
-0.019927	1	0	3
-0.02774	1	0	3
-0.024649	1	0	3
-0.021398	1	0	3
-0.031514	1	0	3
-0.025285	1	0	3
-0.02205	1	0	3
-0.013282	1	0	3
-0.029516	1	0	3
-0.028682	1	0	3
-0.021056	1	0	3
-0.041655	1	0	3
-0.011779	1	0	3
-0.044927	1	0	3
-0.032532	1	0	3
-0.030307	1	0	3
-0.020971	1	0	3
-0.047505	1	0	3
-0.030932	1	0	3
-0.027697	1	0	3
-0.022387	1	0	3
-0.021328	1	0	3
-0.028646	1	0	3
-0.020562	1	0	3
-0.043231	1	0	3
-0.015813	1	0	3
-0.024415	1	0	3
-0.034156	1	0	3
-0.016321	1	0	3
-0.039026	1	0	3
-0.029002	1	0	3
-0.0249	1	0	3
-0.011854	1	0	3
-0.010787	1	0	3
-0.021662	1	0	3
-0.0125	1	0	3
-0.035597	1	0	3
-0.024732	1	0	3
-0.017544	1	0	3
-0.038548	1	0	3
-0.031756	1	0	3
-0.029917	1	0	3
-0.018875	1	0	3
-0.026343	1	0	3
-0.025545	1	0	3
-0.042976	1	0	3
-0.027808	1	0	3
-0.018883	1	0	3
-0.017054	1	0	3
-0.030485	1	0	3
-0.025326	1	0	3
-0.033237	1	0	3
-0.012311	1	0	3
-0.022159	1	0	3
-0.018794	1	0	3
-0.040581	1	0	3
-0.030662	1	0	3
-0.014325	1	0	3
-0.023015	1	0	3
-0.034173	1	0	3
-0.003869	1	0	3
-0.015606	1	0	3
-0.019366	1	0	3
-0.046269	1	0	3
-0.019547	1	0	3
-0.0090832	1	0	3
-0.039022	1	0	3
-0.029004	1	0	3
-0.042851	1	0	3
-0.042292	1	0	3
-0.021926	1	0	3
-0.016421	1	0	3
-0.041826	1	0	3
-0.037927	1	0	3
-0.026073	1	0	3
-0.025678	1	0	3
-0.035647	1	0	3
-0.033926	1	0	3
-0.043983	1	0	3
-0.020547	1	0	3
-0.010983	1	0	3
-0.017879	1	0	3
-0.023879	1	0	3
-0.0058147	1	0	3
-0.033549	1	0	3
-0.011533	1	0	3
-0.028449	1	0	3
-0.027988	1	0	3
-0.025652	1	0	3
-0.042454	1	0	3
-0.022152	1	0	3
-0.028544	1	0	3
-0.027505	1	0	3
-0.027289	1	0	3
-0.018362	1	0	3
-0.043706	1	0	3
-0.02328	1	0	3
-0.031975	1	0	3
-0.020877	1	0	3
-0.038139	1	0	3
-0.031247	1	0	3
-0.024804	1	0	3
-0.025328	1	0	3
-0.032596	1	0	3
-0.021996	1	0	3
-0.030678	1	0	3
-0.027926	1	0	3
-0.046164	1	0	3
-0.042778	1	0	3
-0.0065277	1	0	3
-0.02996	1	0	3
-0.035426	1	0	3
-0.045416	1	0	3
-0.041928	1	0	3
-0.050255	1	0	3
-0.013859	1	0	3
-0.028726	1	0	3
-0.0087101	1	0	3
-0.027687	1	0	3
-0.0072369	1	0	3
-0.027352	1	0	3
-0.045385	1	0	3
-0.040461	1	0	3
-0.02498	1	0	3
-0.037118	1	0	3
-0.021151	1	0	3
-0.053199	1	0	3
-0.041442	1	0	3
-0.036715	1	0	3
-0.038172	1	0	3
-0.017193	1	0	3
-0.026409	1	0	3
-0.016635	1	0	3
-0.026437	1	0	3
-0.029251	1	0	3
-0.031188	1	0	3
-0.01981	1	0	3
-0.016211	1	0	3
-0.032231	1	0	3
-0.032058	1	0	3
-0.038007	1	0	3
-0.024624	1	0	3
-0.017737	1	0	3
-0.039525	1	0	3
-0.033183	1	0	3
-0.041878	1	0	3
-0.034207	1	0	3
-0.010323	1	0	3
-0.0044457	1	0	3
-0.015548	1	0	3
-0.035058	1	0	3
-0.035035	1	0	3
-0.016503	1	0	3
-0.0058198	1	0	3
-0.02238	1	0	3
-0.02722	1	0	3
-0.023453	1	0	3
-0.026684	1	0	3
-0.039515	1	0	3
-0.02882	1	0	3
-0.018443	1	0	3
-0.022412	1	0	3
-0.040742	1	0	3
-0.04431	1	0	3
-0.043267	1	0	3
-0.020231	1	0	3
-0.026612	1	0	3
-0.038583	1	0	3
-0.018998	1	0	3
-0.032957	1	0	3
-0.015517	1	0	3
-0.011389	1	0	3
-0.0077231	1	0	3
-0.047818	1	0	3
-0.0085783	1	0	3
-0.018524	1	0	3
-0.026264	1	0	3
-0.038661	1	0	3
-0.028663	1	0	3
-0.018387	1	0	3
-0.024238	1	0	3
-0.010318	1	0	3
-0.020129	1	0	3
-0.064495	1	0	3
-0.025548	1	0	3
-0.025722	1	0	3
-0.035495	1	0	3
-0.010725	1	0	3
-0.036811	1	0	3
-0.044578	1	0	3
-0.052574	1	0	3
-0.063685	1	0	3
-0.018709	1	0	3
-0.01126	1	0	3
-0.035542	1	0	3
-0.054455	1	0	3
-0.041419	1	0	3
-0.028353	1	0	3
-0.0093211	1	0	3
-0.037252	1	0	3
-0.039548	1	0	3
-0.027206	1	0	3
-0.034947	1	0	3
-0.02736	1	0	3
-0.038345	1	0	3
-0.0044767	1	0	3
-0.028334	1	0	3
-0.022167	1	0	3
-0.012127	1	0	4
-0.018127	1	0	4
-0.0071733	1	0	4
-0.015557	1	0	4
-0.015229	1	0	4
-0.017706	1	0	4
-0.02482	1	0	4
-0.012603	1	0	4
-0.02142	1	0	4
-0.019646	1	0	4
-0.032606	1	0	4
-0.022287	1	0	4
-0.013918	1	0	4
-0.023786	1	0	4
-0.0087968	1	0	4
-0.016648	1	0	4
-0.021802	1	0	4
-0.031547	1	0	4
-0.032337	1	0	4
-0.010965	1	0	4
-0.035488	1	0	4
-0.011596	1	0	4
-0.018485	1	0	4
-0.010842	1	0	4
-0.018062	1	0	4
-0.028847	1	0	4
-0.030976	1	0	4
-0.035351	1	0	4
-0.011097	1	0	4
-0.017907	1	0	4
-0.034163	1	0	4
-0.019993	1	0	4
-0.037333	1	0	4
-0.019199	1	0	4
-0.017123	1	0	4
-0.012104	1	0	4
-0.01465	1	0	4
-0.020324	1	0	4
-0.011796	1	0	4
-0.032156	1	0	4
-0.034616	1	0	4
-0.022714	1	0	4
-0.019833	1	0	4
-0.016362	1	0	4
-0.02112	1	0	4
-0.009488	1	0	4
-0.016801	1	0	4
-0.01688	1	0	4
-0.015064	1	0	4
-0.014601	1	0	4
-0.016587	1	0	4
-0.040757	1	0	4
-0.01531	1	0	4
-0.0179	1	0	4
-0.020303	1	0	4
-0.016251	1	0	4
-0.025252	1	0	4
-0.021939	1	0	4
-0.02894	1	0	4
-0.027379	1	0	4
-0.017297	1	0	4
-0.020023	1	0	4
-0.031018	1	0	4
-0.036528	1	0	4
-0.018509	1	0	4
-0.023733	1	0	4
-0.034654	1	0	4
-0.013374	1	0	4
-0.026952	1	0	4
-0.015054	1	0	4
-0.015728	1	0	4
-0.01927	1	0	4
-0.03328	1	0	4
-0.012608	1	0	4
-0.023396	1	0	4
-0.017264	1	0	4
-0.01264	1	0	4
-0.0045633	1	0	4
-0.010842	1	0	4
-0.014486	1	0	4
-0.011974	1	0	4
-0.014345	1	0	4
-0.016349	1	0	4
-0.023975	1	0	4
-0.012509	1	0	4
-0.018654	1	0	4
-0.0075281	1	0	4
-0.010724	1	0	4
-0.017937	1	0	4
-0.034333	1	0	4
-0.018537	1	0	4
-0.010521	1	0	4
-0.018443	1	0	4
-0.021924	1	0	4
-0.035129	1	0	4
-0.032452	1	0	4
-0.022096	1	0	4
-0.026692	1	0	4
-0.030832	1	0	4
-0.032389	1	0	4
-0.017423	1	0	4
-0.018263	1	0	4
-0.035088	1	0	4
-0.023343	1	0	4
-0.021995	1	0	4
-0.013374	1	0	4
-0.010309	1	0	4
-0.01766	1	0	4
-0.01492	1	0	4
-0.018537	1	0	4
-0.025046	1	0	4
-0.012965	1	0	4
-0.017532	1	0	4
-0.013727	1	0	4
-0.02207	1	0	4
-0.01883	1	0	4
-0.020994	1	0	4
-0.036128	1	0	4
-0.019548	1	0	4
-0.017957	1	0	4
-0.011954	1	0	4
-0.019542	1	0	4
-0.019353	1	0	4
-0.016426	1	0	4
-0.036515	1	0	4
-0.017108	1	0	4
-0.018253	1	0	4
-0.021652	1	0	4
-0.026608	1	0	4
-0.019108	1	0	4
-0.025318	1	0	4
-0.01935	1	0	4
-0.0088087	1	0	4
-0.035386	1	0	4
-0.023117	1	0	4
-0.032686	1	0	4
-0.032194	1	0	4
-0.025679	1	0	4
-0.020819	1	0	4
-0.034964	1	0	4
-0.039777	1	0	4
-0.015899	1	0	4
-0.014462	1	0	4
-0.036785	1	0	4
-0.023554	1	0	4
-0.016304	1	0	4
-0.0056969	1	0	4
-0.024358	1	0	4
-0.030245	1	0	4
-0.025093	1	0	4
-0.012774	1	0	4
-0.011203	1	0	4
-0.0050796	1	0	4
-0.016849	1	0	4
-0.014034	1	0	4
-0.014457	1	0	4
-0.02334	1	0	4
-0.026002	1	0	4
-0.010059	1	0	4
-0.016062	1	0	4
-0.0091723	1	0	4
-0.039568	1	0	4
-0.016317	1	0	4
-0.0066847	1	0	4
-0.022037	1	0	4
-0.02278	1	0	4
-0.031711	1	0	4
-0.019773	1	0	4
-0.01072	1	0	4
-0.012812	1	0	4
-0.017027	1	0	4
-0.012964	1	0	4
-0.025832	1	0	4
-0.020124	1	0	4
-0.015324	1	0	4
-0.044462	1	0	4
-0.013267	1	0	4
-0.018326	1	0	4
-0.032431	1	0	4
-0.032734	1	0	4
-0.039449	1	0	4
-0.02689	1	0	4
-0.021235	1	0	4
-0.019847	1	0	4
-0.031244	1	0	4
-0.0087843	1	0	4
-0.020036	1	0	4
-0.024132	1	0	4
-0.017678	1	0	4
-0.014604	1	0	4
-0.013776	1	0	4
-0.016471	1	0	4
-0.024632	1	0	4
-0.014359	1	0	4
-0.015986	1	0	4
-0.043194	1	0	5
-0.022447	1	0	5
-0.030174	1	0	5
-0.029488	1	0	5
-0.0187	1	0	5
-0.064046	1	0	5
-0.014242	1	0	5
-0.015922	1	0	5
-0.034469	1	0	5
-0.036683	1	0	5
-0.037321	1	0	5
-0.03759	1	0	5
-0.012048	1	0	5
-0.010437	1	0	5
-0.034779	1	0	5
-0.031659	1	0	5
-0.015656	1	0	5
-0.022627	1	0	5
-0.020834	1	0	5
-0.021363	1	0	5
-0.0055661	1	0	5
-0.026695	1	0	5
-0.06078	1	0	5
-0.039096	1	0	5
-0.011737	1	0	5
-0.014056	1	0	5
-0.015637	1	0	5
-0.027946	1	0	5
-0.015604	1	0	5
-0.019732	1	0	5
-0.013495	1	0	5
-0.01336	1	0	5
-0.012046	1	0	5
-0.045605	1	0	5
-0.024885	1	0	5
-0.010587	1	0	5
-0.0082341	1	0	5
-0.017794	1	0	5
-0.015215	1	0	5
-0.022083	1	0	5
-0.010707	1	0	5
-0.0070447	1	0	5
-0.022373	1	0	5
-0.016159	1	0	5
-0.012576	1	0	5
-0.0097606	1	0	5
-0.016702	1	0	5
-0.024156	1	0	5
-0.026594	1	0	5
-0.022474	1	0	5
-0.021255	1	0	5
-0.033054	1	0	5
-0.031088	1	0	5
-0.013468	1	0	5
-0.012638	1	0	5
-0.008243	1	0	5
-0.021423	1	0	5
-0.012917	1	0	5
-0.020124	1	0	5
-0.012903	1	0	5
-0.014955	1	0	5
-0.02882	1	0	5
-0.012275	1	0	5
-0.0032884	1	0	5
-0.012926	1	0	5
-0.015996	1	0	5
-0.0065141	1	0	5
-0.022246	1	0	5
-0.03847	1	0	5
-0.017514	1	0	5
-0.023136	1	0	5
-0.039152	1	0	5
-0.018367	1	0	5
-0.021454	1	0	5
-0.024124	1	0	5
-0.013107	1	0	5
-0.034873	1	0	5
-0.013774	1	0	5
-0.017833	1	0	5
-0.038355	1	0	5
-0.035954	1	0	5
-0.052519	1	0	5
-0.054134	1	0	5
-0.039044	1	0	5
-0.046493	1	0	5
-0.027821	1	0	5
-0.030965	1	0	5
-0.02147	1	0	5
-0.015948	1	0	5
-0.015184	1	0	5
-0.027653	1	0	5
-0.012519	1	0	5
-0.02867	1	0	5
-0.012	1	0	5
-0.0242	1	0	5
-0.051545	1	0	5
-0.02304	1	0	5
-0.010866	1	0	5
-0.0080283	1	0	5
-0.012442	1	0	5
-0.023016	1	0	5
-0.021609	1	0	5
-0.025186	1	0	5
-0.031029	1	0	5
-0.02059	1	0	5
-0.0090013	1	0	5
-0.026002	1	0	5
-0.025596	1	0	5
-0.04266	1	0	5
-0.011718	1	0	5
-0.016351	1	0	5
-0.019993	1	0	5
-0.025599	1	0	5
-0.035259	1	0	5
-0.0087422	1	0	5
-0.031003	1	0	5
-0.0072525	1	0	5
-0.020397	1	0	5
-0.0086385	1	0	5
-0.031152	1	0	5
-0.031684	1	0	5
-0.023202	1	0	5
-0.0020804	1	0	5
-0.017602	1	0	5
-0.0083365	1	0	5
-0.022479	1	0	5
-0.023913	1	0	5
-0.020613	1	0	5
-0.019451	1	0	5
-0.020423	1	0	5
-0.048874	1	0	5
-0.020302	1	0	5
-0.054953	1	0	5
-0.019206	1	0	5
-0.026512	1	0	5
-0.016285	1	0	5
-0.013394	1	0	5
-0.009823	1	0	5
-0.025184	1	0	5
-0.037404	1	0	5
-0.027987	1	0	5
-0.010451	1	0	5
-0.0068331	1	0	5
-0.023247	1	0	5
-0.017207	1	0	5
-0.010156	1	0	5
-0.016966	1	0	5
-0.031856	1	0	5
-0.022985	1	0	5
-0.017601	1	0	5
-0.015597	1	0	5
-0.020936	1	0	5
-0.016098	1	0	5
-0.040635	1	0	5
-0.013813	1	0	5
-0.028245	1	0	5
-0.018756	1	0	5
-0.048523	1	0	5
-0.016787	1	0	5
-0.044014	1	1	1
-0.065156	1	1	1
-0.039272	1	1	1
-0.13193	1	1	1
-0.016101	1	1	1
-0.029207	1	1	1
-0.014963	1	1	1
-0.029785	1	1	1
-0.010812	1	1	1
-0.059445	1	1	1
-0.022786	1	1	1
-0.0088077	1	1	1
-0.04772	1	1	1
-0.014686	1	1	1
-0.014715	1	1	1
-0.073606	1	1	1
-0.040772	1	1	1
-0.0738	1	1	1
-0.065252	1	1	1
-0.070732	1	1	1
-0.04929	1	1	1
-0.11121	1	1	1
-0.019005	1	1	1
-0.027267	1	1	1
-0.012079	1	1	1
-0.0094822	1	1	1
-0.011939	1	1	1
-0.10974	1	1	1
-0.02387	1	1	1
-0.018442	1	1	1
-0.052163	1	1	1
-0.054984	1	1	1
-0.073334	1	1	1
-0.0062757	1	1	1
-0.01496	1	1	1
-0.10254	1	1	1
-0.051621	1	1	1
-0.099225	1	1	1
-0.028721	1	1	1
-0.035006	1	1	1
-0.043168	1	1	1
-0.019741	1	1	1
-0.0070115	1	1	1
-0.015567	1	1	1
-0.12475	1	1	1
-0.14752	1	1	1
-0.020019	1	1	1
-0.02103	1	1	1
-0.10396	1	1	1
-0.047528	1	1	1
-0.033217	1	1	1
-0.029927	1	1	1
-0.021707	1	1	1
-0.015404	1	1	1
-0.12531	1	1	1
-0.14533	1	1	1
-0.01658	1	1	1
-0.073982	1	1	1
-0.050457	1	1	1
-0.094896	1	1	1
-0.084848	1	1	1
-0.093188	1	1	1
-0.0091493	1	1	1
-0.024956	1	1	1
-0.051507	1	1	1
-0.085331	1	1	1
-0.03853	1	1	1
-0.021676	1	1	1
-0.030839	1	1	1
-0.041265	1	1	1
-0.018425	1	1	1
-0.032965	1	1	1
-0.14317	1	1	1
-0.01913	1	1	1
-0.099045	1	1	1
-0.038458	1	1	1
-0.08153	1	1	1
-0.031899	1	1	1
-0.08312	1	1	1
-0.030659	1	1	1
-0.028149	1	1	1
-0.027546	1	1	1
-0.077849	1	1	1
-0.03499	1	1	1
-0.03616	1	1	1
-0.027238	1	1	1
-0.05798	1	1	1
-0.030819	1	1	1
-0.027454	1	1	1
-0.056637	1	1	1
-0.011149	1	1	1
-0.017355	1	1	1
-0.043619	1	1	1
-0.041006	1	1	1
-0.036053	1	1	1
-0.0098929	1	1	1
-0.012621	1	1	1
-0.021579	1	1	1
-0.025777	1	1	1
-0.020522	1	1	1
-0.039696	1	1	1
-0.068528	1	1	1
-0.019053	1	1	1
-0.019758	1	1	1
-0.084568	1	1	1
-0.098105	1	1	1
-0.0036723	1	1	1
-0.079113	1	1	1
-0.081269	1	1	1
-0.065621	1	1	1
-0.037144	1	1	1
-0.080548	1	1	1
-0.018491	1	1	1
-0.027083	1	1	1
-0.038439	1	1	1
-0.045121	1	1	1
-0.068001	1	1	1
-0.026228	1	1	1
-0.054697	1	1	1
-0.023897	1	1	1
-0.053833	1	1	1
-0.067712	1	1	1
-0.011627	1	1	1
-0.02041	1	1	1
-0.0095896	1	1	1
-0.015047	1	1	1
-0.022166	1	1	1
-0.022753	1	1	1
-0.016156	1	1	1
-0.041469	1	1	1
-0.028824	1	1	1
-0.020367	1	1	1
-0.011201	1	1	1
-0.034676	1	1	1
-0.016205	1	1	1
-0.0058982	1	1	1
-0.068309	1	1	1
-0.070442	1	1	1
-0.032663	1	1	1
-0.12593	1	1	1
-0.087842	1	1	1
-0.022098	1	1	1
-0.021038	1	1	1
-0.0082255	1	1	1
-0.024799	1	1	1
-0.03871	1	1	1
-0.017075	1	1	1
-0.046605	1	1	1
-0.074815	1	1	1
-0.020764	1	1	1
-0.023173	1	1	1
-0.019236	1	1	1
-0.018258	1	1	1
-0.07001	1	1	1
-0.030181	1	1	1
-0.10661	1	1	1
-0.024945	1	1	1
-0.032141	1	1	1
-0.033875	1	1	1
-0.011284	1	1	1
-0.01844	1	1	1
-0.0096094	1	1	1
-0.046116	1	1	1
-0.012458	1	1	1
-0.035225	1	1	1
-0.01973	1	1	1
-0.046929	1	1	1
-0.10319	1	1	1
-0.17406	1	1	1
-0.015868	1	1	1
-0.032262	1	1	1
-0.027712	1	1	1
-0.033195	1	1	1
-0.019123	1	1	1
-0.04587	1	1	1
-0.053195	1	1	1
-0.051745	1	1	1
-0.033596	1	1	1
-0.080904	1	1	1
-0.054181	1	1	1
-0.013646	1	1	1
-0.03085	1	1	1
-0.044494	1	1	1
-0.082087	1	1	1
-0.028143	1	1	1
-0.075472	1	1	1
-0.02549	1	1	1
-0.089582	1	1	1
-0.063071	1	1	1
-0.028993	1	1	1
-0.019676	1	1	1
-0.13272	1	1	1
-0.033027	1	1	1
-0.019804	1	1	1
-0.15276	1	1	1
-0.024071	1	1	1
-0.070885	1	1	1
-0.014677	1	1	1
-0.015521	1	1	1
-0.013442	1	1	1
-0.032139	1	1	1
-0.053878	1	1	2
-0.034948	1	1	2
-0.090551	1	1	2
-0.068119	1	1	2
-0.052994	1	1	2
-0.0591	1	1	2
-0.092196	1	1	2
-0.01278	1	1	2
-0.10167	1	1	2
-0.074036	1	1	2
-0.0097825	1	1	2
-0.017862	1	1	2
-0.013167	1	1	2
-0.018975	1	1	2
-0.015807	1	1	2
-0.012688	1	1	2
-0.11622	1	1	2
-0.050341	1	1	2
-0.019058	1	1	2
-0.018671	1	1	2
-0.031067	1	1	2
-0.024697	1	1	2
-0.088513	1	1	2
-0.016306	1	1	2
-0.013701	1	1	2
-0.061878	1	1	2
-0.07532	1	1	2
-0.023711	1	1	2
-0.088712	1	1	2
-0.12574	1	1	2
-0.048428	1	1	2
-0.065147	1	1	2
0.0048871	1	1	2
-0.04782	1	1	2
-0.016233	1	1	2
-0.015797	1	1	2
-9.0073e-05	1	1	2
-0.1016	1	1	2
-0.070261	1	1	2
-0.050659	1	1	2
-0.019483	1	1	2
-0.082994	1	1	2
-0.077192	1	1	2
-0.13946	1	1	2
-0.04229	1	1	2
-0.080794	1	1	2
-0.013109	1	1	2
-0.019657	1	1	2
-0.095871	1	1	2
-0.12374	1	1	2
-0.082795	1	1	2
-0.08716	1	1	2
-0.10318	1	1	2
-0.095008	1	1	2
-0.027949	1	1	2
-0.016802	1	1	2
-0.0047558	1	1	2
-0.030019	1	1	2
-0.038127	1	1	2
-0.008305	1	1	2
-0.094189	1	1	2
-0.036278	1	1	2
-0.045759	1	1	2
-0.011576	1	1	2
-0.020193	1	1	2
-0.012687	1	1	2
-0.042736	1	1	2
-0.029052	1	1	2
-0.05773	1	1	2
-0.053948	1	1	2
-0.016244	1	1	2
-0.014671	1	1	2
-0.024955	1	1	2
-0.026108	1	1	2
-0.031716	1	1	2
-0.018217	1	1	2
-0.014411	1	1	2
-0.034795	1	1	2
-0.046248	1	1	2
-0.048982	1	1	2
-0.015377	1	1	2
-0.010032	1	1	2
-0.041033	1	1	2
-0.12618	1	1	2
-0.095324	1	1	2
-0.14328	1	1	2
-0.033715	1	1	2
-0.0084502	1	1	2
-0.11358	1	1	2
-0.018055	1	1	2
-0.021977	1	1	2
-0.0067563	1	1	2
-0.013046	1	1	2
-0.14014	1	1	2
-0.023739	1	1	2
-0.029668	1	1	2
-0.028267	1	1	2
-0.081851	1	1	2
-0.016076	1	1	2
-0.024272	1	1	2
-0.037695	1	1	2
-0.14965	1	1	2
-0.11873	1	1	2
-0.0097453	1	1	2
-0.079549	1	1	2
-0.0031021	1	1	2
-0.037498	1	1	2
-0.012637	1	1	2
-0.0912	1	1	2
-0.048596	1	1	2
-0.092258	1	1	2
-0.022769	1	1	2
-0.096755	1	1	2
-0.069131	1	1	2
-0.16393	1	1	2
-0.00020109	1	1	2
-0.059445	1	1	2
-0.013667	1	1	2
-0.094676	1	1	2
-0.0085834	1	1	2
-0.021624	1	1	2
-0.012003	1	1	2
-0.01403	1	1	2
-0.048159	1	1	2
-0.03109	1	1	2
-0.044678	1	1	2
-0.020593	1	1	2
-0.059384	1	1	2
-0.069373	1	1	2
-0.01536	1	1	2
-0.045845	1	1	2
-0.037735	1	1	2
-0.0098321	1	1	2
-0.02169	1	1	2
-0.16502	1	1	2
-0.015954	1	1	2
-0.028741	1	1	2
-0.015796	1	1	2
-0.01909	1	1	2
-0.060573	1	1	2
-0.031751	1	1	2
-0.06568	1	1	2
-0.059711	1	1	2
-0.085333	1	1	2
-0.081925	1	1	2
-0.058515	1	1	2
-0.015917	1	1	2
-0.015305	1	1	2
-0.019975	1	1	2
-0.064391	1	1	2
-0.050514	1	1	2
-0.042465	1	1	2
-0.038482	1	1	2
-0.017669	1	1	2
-0.060432	1	1	2
-0.018179	1	1	2
-0.015673	1	1	2
-0.12248	1	1	2
-0.09561	1	1	2
-0.051588	1	1	2
-0.086264	1	1	2
-0.076912	1	1	2
-0.065991	1	1	2
-0.072936	1	1	2
-0.0085948	1	1	2
-0.13571	1	1	2
-0.011077	1	1	2
-0.019438	1	1	2
-0.14671	1	1	2
-0.020873	1	1	2
-0.11436	1	1	2
-0.046409	1	1	2
-0.026733	1	1	2
-0.080666	1	1	2
-0.090613	1	1	2
-0.012968	1	1	2
-0.13173	1	1	2
-0.10083	1	1	2
-0.05169	1	1	2
-0.034217	1	1	2
-0.0043042	1	1	2
-0.028444	1	1	2
-0.022562	1	1	2
-0.15452	1	1	2
-0.024332	1	1	2
-0.018046	1	1	2
-0.041464	1	1	2
-0.041742	1	1	2
-0.10114	1	1	2
-0.019189	1	1	2
-0.081335	1	1	2
-0.1631	1	1	2
-0.047358	1	1	2
-0.044146	1	1	2
-0.035829	1	1	2
-0.017984	1	1	2
-0.011851	1	1	2
-0.012413	1	1	2
-0.065633	1	1	2
-0.099932	1	1	2
-0.010185	1	1	2
-0.06175	1	1	2
-0.021986	1	1	2
-0.050869	1	1	2
-0.11857	1	1	2
-0.12682	1	1	2
-0.077192	1	1	2
-0.07043	1	1	2
-0.10921	1	1	2
-0.13002	1	1	2
-0.12326	1	1	2
-0.13769	1	1	2
-0.1008	1	1	2
-0.021388	1	1	2
-0.077122	1	1	2
-0.015006	1	1	2
-0.0379	1	1	2
-0.027892	1	1	2
-0.065222	1	1	2
-0.012808	1	1	2
-0.086284	1	1	2
-0.079313	1	1	2
-0.068011	1	1	2
-0.045922	1	1	2
-0.051092	1	1	2
-0.080398	1	1	2
-0.033715	1	1	2
-0.14722	1	1	2
-0.023071	1	1	2
-0.084331	1	1	2
-0.071046	1	1	2
-0.035424	1	1	2
-0.019838	1	1	2
-0.030431	1	1	2
-0.025007	1	1	2
-0.074368	1	1	2
-0.14085	1	1	2
-0.088736	1	1	2
-0.042758	1	1	2
-0.068467	1	1	2
-0.011613	1	1	2
-0.097641	1	1	2
-0.09925	1	1	2
-0.057391	1	1	2
-0.074279	1	1	2
-0.043248	1	1	2
-0.08945	1	1	2
-0.057279	1	1	2
-0.027937	1	1	2
-0.14351	1	1	2
0.01508	1	1	2
-0.024128	1	1	2
-0.0038891	1	1	2
-0.020938	1	1	2
-0.095581	1	1	2
-0.012275	1	1	2
-0.0090194	1	1	2
-0.057137	1	1	2
-0.13161	1	1	2
-0.01579	1	1	2
-0.038164	1	1	2
-0.015125	1	1	2
-0.042779	1	1	2
-0.036066	1	1	2
-0.033261	1	1	2
-0.078498	1	1	2
-0.035969	1	1	2
-0.027535	1	1	2
-0.14	1	1	2
-0.055914	1	1	2
-0.066645	1	1	2
-0.017449	1	1	2
-0.0077672	1	1	2
-0.022163	1	1	2
-0.014627	1	1	2
-0.049773	1	1	2
-0.018373	1	1	2
-0.071863	1	1	2
-0.031332	1	1	2
-0.0099507	1	1	2
-0.030968	1	1	2
-0.067831	1	1	2
0.0042018	1	1	2
-0.007378	1	1	2
-0.043457	1	1	2
-0.022226	1	1	2
-0.15475	1	1	2
-0.0060609	1	1	2
-0.06423	1	1	2
-0.059605	1	1	2
-0.010622	1	1	2
-0.072937	1	1	2
-0.011241	1	1	2
-0.024826	1	1	2
-0.016875	1	1	2
-0.01739	1	1	2
-0.1058	1	1	2
-0.034299	1	1	2
-0.0877	1	1	2
-0.011948	1	1	2
-0.040458	1	1	2
-0.077997	1	1	2
-0.1177	1	1	2
-0.069297	1	1	2
-0.14233	1	1	2
-0.068793	1	1	2
-0.16508	1	1	2
-0.062138	1	1	2
-0.11168	1	1	2
-0.03871	1	1	2
-0.03185	1	1	2
-0.11204	1	1	2
-0.073762	1	1	2
-0.055162	1	1	2
-0.06282	1	1	2
-0.12757	1	1	2
-0.14187	1	1	2
-0.064112	1	1	2
-0.045191	1	1	2
-0.11169	1	1	2
-0.032055	1	1	2
-0.083839	1	1	2
-0.1133	1	1	2
-0.13318	1	1	2
-0.033397	1	1	2
-0.034497	1	1	2
-0.083961	1	1	2
-0.15165	1	1	2
-0.02398	1	1	2
-0.016067	1	1	2
-0.05057	1	1	2
-0.013316	1	1	2
-0.1188	1	1	2
-0.13174	1	1	2
-0.012479	1	1	2
-0.013011	1	1	2
-0.12643	1	1	2
-0.080059	1	1	2
-0.031687	1	1	2
-0.093007	1	1	2
-0.022364	1	1	2
-0.016267	1	1	2
-0.0637	1	1	2
-0.010158	1	1	2
-0.08963	1	1	2
-0.025945	1	1	2
-0.035839	1	1	2
-0.0093067	1	1	2
-0.012324	1	1	2
-0.010139	1	1	2
-0.011458	1	1	2
-0.092836	1	1	2
-0.097893	1	1	2
-0.098507	1	1	2
-0.018732	1	1	2
-0.016105	1	1	2
-0.016724	1	1	2
-0.086308	1	1	2
-0.1046	1	1	2
-0.072777	1	1	2
-0.00014243	1	1	2
-0.010872	1	1	2
-0.047358	1	1	2
-0.058751	1	1	2
-0.010093	1	1	2
-0.10538	1	1	2
-0.022018	1	1	2
-0.019644	1	1	2
-0.0098236	1	1	2
-0.090328	1	1	2
-0.098507	1	1	2
-0.082783	1	1	2
-0.10786	1	1	2
-0.04767	1	1	2
-0.12015	1	1	2
-0.091803	1	1	2
-0.073566	1	1	2
-0.1197	1	1	2
-0.042717	1	1	2
-0.039489	1	1	2
-0.025371	1	1	2
-0.01898	1	1	2
-0.099203	1	1	2
-0.085855	1	1	2
-0.046223	1	1	2
-0.02517	1	1	2
-0.11415	1	1	2
-0.039269	1	1	2
-0.12199	1	1	2
-0.035418	1	1	2
-0.038664	1	1	2
-0.065591	1	1	2
-0.035621	1	1	2
-0.027281	1	1	2
-0.028797	1	1	2
-0.010333	1	1	2
-0.049398	1	1	2
-0.023139	1	1	2
-0.054962	1	1	2
-0.098316	1	1	2
-0.088786	1	1	2
-0.043413	1	1	2
-0.02142	1	1	2
-0.065348	1	1	2
-0.15255	1	1	2
-0.020538	1	1	2
-0.14773	1	1	2
-0.10007	1	1	2
-0.019974	1	1	2
-0.03081	1	1	2
-0.032833	1	1	2
-0.019043	1	1	2
-0.053543	1	1	2
-0.020004	1	1	2
-0.062392	1	1	2
-0.011418	1	1	2
-0.1107	1	1	2
-0.027448	1	1	2
-0.013962	1	1	2
-0.058506	1	1	2
-0.041312	1	1	2
-0.021339	1	1	2
-0.033473	1	1	2
-0.031014	1	1	2
-0.10556	1	1	2
-0.074596	1	1	2
-0.029734	1	1	2
-0.037989	1	1	2
-0.020623	1	1	2
-0.017076	1	1	2
-0.081936	1	1	2
-0.016495	1	1	3
-0.0035535	1	1	3
-0.0056811	1	1	3
-0.019335	1	1	3
-0.0062047	1	1	3
-0.00051998	1	1	3
-0.0081769	1	1	3
0.0019924	1	1	3
-0.021709	1	1	3
0.0068939	1	1	3
-0.0073097	1	1	3
-0.02881	1	1	3
-0.023437	1	1	3
-0.010612	1	1	3
-0.0080525	1	1	3
-0.015866	1	1	3
-0.0080418	1	1	3
-0.009971	1	1	3
-0.008025	1	1	3
-0.0042518	1	1	3
-0.0052846	1	1	3
-0.022585	1	1	3
-0.0072921	1	1	3
-0.013818	1	1	3
-0.0039916	1	1	3
-3.1199e-05	1	1	3
-0.017987	1	1	3
-0.016038	1	1	3
-0.01397	1	1	3
-0.01038	1	1	3
-0.0092419	1	1	3
-0.013566	1	1	3
-0.005503	1	1	3
-0.0072534	1	1	3
-0.0095632	1	1	3
-0.0069086	1	1	3
-0.051205	1	1	3
-0.016196	1	1	3
-0.0070856	1	1	3
-0.0095191	1	1	3
-0.018899	1	1	3
-0.0076739	1	1	3
-0.016284	1	1	3
-0.0086754	1	1	3
-0.0018844	1	1	3
-0.0031027	1	1	3
-0.0080028	1	1	3
-0.012563	1	1	3
-0.0073809	1	1	3
-0.010955	1	1	3
-0.0070394	1	1	3
-0.011087	1	1	3
-0.0122	1	1	3
-0.0055205	1	1	3
-0.016293	1	1	3
-0.02301	1	1	3
0.0043649	1	1	3
-0.019948	1	1	3
-0.014864	1	1	3
-0.00761	1	1	3
-0.012059	1	1	3
-0.01072	1	1	3
-0.0030548	1	1	3
-0.0096772	1	1	3
-0.0087171	1	1	3
-0.0083503	1	1	3
-0.0081912	1	1	3
-0.010094	1	1	3
-0.0043787	1	1	3
-0.01446	1	1	3
-0.0078863	1	1	3
-0.014025	1	1	3
-0.025176	1	1	3
-0.0099958	1	1	3
-0.009074	1	1	3
-0.017793	1	1	3
-0.010174	1	1	3
-0.010526	1	1	3
[truncated: 16,203 more rows]
