# Supplementary material for: Breakdown of local information processing may underlie isoflurane anesthesia effects
Source: PLoS Comput Biol. 2017 Jun 1;13(6):e1005511. doi: 10.1371/journal.pcbi.1005511 (PMC5453425; doi:10.1371/journal.pcbi.1005511)
Supplement: S1 Dataset — (ZIP) [file pcbi.1005511.s001.zip › ferret_2_te_ksg_raw_median.csv]

raw data	data z_scored	factor direction	factor anesthesia
-0.020148	1.3864	1	1
-0.018592	1.4781	1	1
-0.025184	1.0897	1	1
-0.018654	1.4745	1	1
-0.020613	1.359	1	1
-0.032663	0.64901	2	1
-0.042758	0.054213	2	1
-0.013074	1.8032	2	1
-0.033005	0.62886	2	1
-0.014006	1.7483	2	1
-0.035217	0.49855	1	2
-0.045111	-0.084419	1	2
-0.036455	0.42558	1	2
-0.032413	0.66379	1	2
-0.022438	1.2515	1	2
-0.04761	-0.23168	1	2
-0.037267	0.37776	2	2
-0.044473	-0.046825	2	2
-0.040158	0.20744	2	2
-0.035317	0.49265	2	2
-0.034023	0.56891	2	2
-0.037288	0.37655	2	2
-0.052931	-0.54521	1	3
-0.064934	-1.2524	1	3
-0.046592	-0.17168	1	3
-0.057874	-0.83646	1	3
-0.049599	-0.34888	1	3
-0.073821	-1.7761	1	3
-0.061777	-1.0664	1	3
-0.064694	-1.2383	1	3
-0.063	-1.1385	1	3
-0.057465	-0.81236	1	3
-0.064385	-1.2201	1	3
-0.034673	0.53061	2	3
-0.035631	0.47416	2	3
-0.040934	0.16172	2	3
-0.041105	0.15163	2	3
-0.040119	0.2097	2	3
-0.068003	-1.4333	2	3
-0.04554	-0.10972	2	3
-0.062254	-1.0945	2	3
-0.074142	-1.795	2	3
-0.068251	-1.4479	2	3
-0.067649	-1.4124	2	3
