# Supplementary material for: Breakdown of local information processing may underlie isoflurane anesthesia effects
Source: PLoS Comput Biol. 2017 Jun 1;13(6):e1005511. doi: 10.1371/journal.pcbi.1005511 (PMC5453425; doi:10.1371/journal.pcbi.1005511)
Supplement: S1 Dataset — (ZIP) [file pcbi.1005511.s001.zip › ferret_2_te_nsb_mean_param_interaction.csv]

mean FB	sem FB	mean FF	sem FF
0.066646	0.0055231	0.036363	0.008077
0.045781	0.0086439	0.030315	0.0026742
0.033204	0.0046317	0.022508	0.01211
