# Supplementary material for: Breakdown of local information processing may underlie isoflurane anesthesia effects
Source: PLoS Comput Biol. 2017 Jun 1;13(6):e1005511. doi: 10.1371/journal.pcbi.1005511 (PMC5453425; doi:10.1371/journal.pcbi.1005511)
Supplement: S1 Dataset — (ZIP) [file pcbi.1005511.s001.zip › ferret_2_te_nsb_raw_mean.csv]

raw data	factor direction	factor anesthesia
0.074966	1	1
0.0515	1	1
0.074757	1	1
0.065362	1	1
0.02609	2	1
0.059827	2	1
0.034226	2	1
0.025309	2	1
0.045813	1	2
0.029108	1	2
0.038608	1	2
0.069596	1	2
0.032072	2	2
0.023713	2	2
0.029037	2	2
0.036439	2	2
0.037512	1	3
0.019585	1	3
0.040101	1	3
0.035616	1	3
0.058418	2	3
0.0053663	2	3
0.013586	2	3
0.012662	2	3
