# Supplementary material for: Breakdown of local information processing may underlie isoflurane anesthesia effects
Source: PLoS Comput Biol. 2017 Jun 1;13(6):e1005511. doi: 10.1371/journal.pcbi.1005511 (PMC5453425; doi:10.1371/journal.pcbi.1005511)
Supplement: S1 Dataset — (ZIP) [file pcbi.1005511.s001.zip › ferret_2_te_opt_u.csv]

awake FB	awake FF	iso 0.5 FB	iso 0.5 FF	iso 1.0 FB	iso 1.0 FF
3	5	3	3	3	5
7	4	6	2	1	4
5	5	4	2	2	9
4	11	4	4	10	6
4	9	4	10	3	3
NaN	NaN	8	3	3	3
NaN	NaN	NaN	NaN	3	3
NaN	NaN	NaN	NaN	4	5
NaN	NaN	NaN	NaN	8	10
NaN	NaN	NaN	NaN	3	3
NaN	NaN	NaN	NaN	3	2
NaN	NaN	NaN	NaN	7	3
