# Supplementary material for: Breakdown of local information processing may underlie isoflurane anesthesia effects
Source: PLoS Comput Biol. 2017 Jun 1;13(6):e1005511. doi: 10.1371/journal.pcbi.1005511 (PMC5453425; doi:10.1371/journal.pcbi.1005511)
Supplement: S1 Dataset — (ZIP) [file pcbi.1005511.s001.zip › readme.txt]

 
The relation of local entropy and information transfer suggests an origin of isoflurane anesthesia effects in local information processing

Patricia Wollstadt, Kristin K. Sellers, Lucas Rudelt, Viola Priesemann, Axel Hutt, Flavio Froehlich, Michael Wibral

Data aggregated over trials/within recordings that entered the parametric testing (permutation ANOVA):

raw data entering the ANOVA

ferret_[number]_[measure]_[estimator]_raw_[aggregation_method].csv
ferret_[number]_[measure]_[estimator]_raw_[aggregation_method].csv,

where [number] is the animal number (1 or 2), [measure] is the information theoretic measure (AIS, TE, or H), [estimator] is the estimator used (either KSG for Kraskov-Stoegbauer-Grassberger, nearest-neighbor estimator, or NSB for Nemenman-Shafe-Bialek, Bayes-estimator), [aggregation_method] is the method used to aggregate data over trials within a recording (either median or mean). Results are shown in Table 1 and Table 3. Data consist of columns 'raw data' (estimated [measure] for each recording, aggregated over trials using [aggregation_method]) and 'data z_score' for KSG data (z-standardized raw data); 'factor direction', encoding the direction of interaction (for TE) or recording site (for AIS and H), respectively (2 levels); 'factor anesthesia' encoding the anesthesia level (3 levels).

Additionally, we provide data used to generate plots of ANOVA main effects and interactions in Figures 1 and 2: data for the interaction plots are provided in 

ferret_[number]_[measure]_[estimator]_[aggregation_method]_param_interaction,

where [number], [measure], [estimator], and [aggregation_method] are the same as above. Data consists of four columns with means and standard error of the means for both directions (FB for feedback, i.e., PFC -> V1, and FF for feedforward, i.e., V1 -> PFC); each column contains three values for the three anesthesia levels.

Data for the main effects are provided in 

ferret_[number]_[measure]_[estimator]_[aggregation_method]_param_main_effect,

where [number], [measure], [estimator], and [aggregation_method] are the same as above. Data consists of two columns with means and standard error of the means (sem); each column contains three values for the three anesthesia levels.

We provide non-aggregated raw data entering the linear mixed models described in Table 2:

ferret_[number]_[measure]_ksg_raw_lmm.csv,

where [number] and [measure] are the same as above. Data consists of four columns: 'raw data', estimated values for [measure], 'factor anesthesia', 'factor direction', 'factor recording', encoding the levels of each factor.

Last, we provide optimized embedding delays u for TE estimation for both animals in 

ferret_[number]_te_opt_u.csv.

Data consists of six columns with optimized u for both directions (FB and FF as aboev) and four anesthesia levels for each recording.
