# Supplementary material for: Breakdown of local information processing may underlie isoflurane anesthesia effects
Source: PLOS journal article supplement (doi:10.1371/journal.pcbi.1005511), 2017-06-01
Supplement: S3 (10.1371/journal.pcbi.1005511.s003) [file journal.pcbi.1005511.s003.pdf]

| <b>animal</b> | <b>isoflurane level</b> | <b>recording site</b> | $p$    | $\tilde{R}^2$ ( $max(R^2)$ ) |
|---------------|-------------------------|-----------------------|--------|------------------------------|
| 1             | iso 0.0 %               | PFC                   | 1.0000 | 0.087 (0.705)                |
|               |                         | V1                    | 1.0000 | 0.079 (0.452)                |
|               | iso 0.5 %               | PFC                   | 1.0000 | 0.036 (0.093)                |
|               |                         | V1                    | 1.0000 | 0.062 (0.217)                |
|               | iso 1.0 %               | PFC                   | 1.0000 | 0.010 (0.474)                |
|               |                         | V1                    | 1.0000 | 0.018 (0.083)                |
| 2             | iso 0.0 %               | PFC                   | 1.0000 | 0.042 (0.699)                |
|               |                         | V1                    | 1.0000 | 0.162 (0.363)                |
|               | iso 0.5 %               | PFC                   | 1.0000 | 0.041 (0.130)                |
|               |                         | V1                    | 1.0000 | 0.031 (0.289)                |
|               | iso 1.0 %               | PFC                   | 1.0000 | 0.118 (0.602)                |
|               |                         | V1                    | 1.0000 | 0.018 (0.578)                |

\* $p < 0.05$ ; \*\* $p < 0.01$ ; \*\*\* $p < 0.001$
