# Supplementary material for: Breakdown of local information processing may underlie isoflurane anesthesia effects
Source: PLOS journal article supplement (doi:10.1371/journal.pcbi.1005511), 2017-06-01
Supplement: S5 (10.1371/journal.pcbi.1005511.s005) [file journal.pcbi.1005511.s005.pdf]

| animal | level     | site | $\delta$  |                          | $\theta$  |                          | $\alpha$  |                          |
|--------|-----------|------|-----------|--------------------------|-----------|--------------------------|-----------|--------------------------|
|        |           |      | $p$       | $\tilde{R}^2 (max(R^2))$ | $p$       | $\tilde{R}^2 (max(R^2))$ | $p$       | $\tilde{R}^2 (max(R^2))$ |
| 1      | iso 0.0 % | PFC  | 1.0000    | 0.068 (0.418)            | 0.0000*** | 0.021 (0.201)            | 0.0000*** | 0.022 (0.258)            |
|        |           | V1   | 0.0000*** | 0.041 (0.275)            | 0.0003**  | 0.020 (0.160)            | 0.0000*** | 0.029 (0.166)            |
|        | iso 0.5 % | PFC  | 0.0000*** | 0.019 (0.174)            | 0.0000*** | 0.005 (0.040)            | 0.0000*** | 0.003 (0.075)            |
|        |           | V1   | 0.0000*** | 0.008 (0.129)            | 0.0093    | 0.024 (0.060)            | 0.0986    | 0.009 (0.090)            |
|        | iso 1.0 % | PFC  | 0.0000*** | 0.006 (0.036)            | 0.8710    | 0.005 (0.093)            | 0.0445    | 0.003 (0.028)            |
|        |           | V1   | 0.2751    | 0.010 (0.303)            | 0.0000*** | 0.002 (0.054)            | 0.0000*** | 0.002 (0.030)            |
| 2      | iso 0.0 % | PFC  | 0.0000*** | 0.158 (0.359)            | 0.0000*** | 0.044 (0.089)            | 0.0000*** | 0.025 (0.075)            |
|        |           | V1   | 0.0000*** | 0.005 (0.303)            | 0.0000*** | 0.023 (0.228)            | 0.0000*** | 0.042 (0.238)            |
|        | iso 0.5 % | PFC  | 0.0000*** | 0.019 (0.255)            | 0.0000*** | 0.007 (0.018)            | 0.0000*** | 0.006 (0.074)            |
|        |           | V1   | 0.0000*** | 0.025 (0.098)            | 0.6476    | 0.024 (0.068)            | 1.0000    | 0.017 (0.045)            |
|        | iso 1.0 % | PFC  | 0.0000*** | 0.005 (0.298)            | 0.9729    | 0.005 (0.021)            | 0.9999    | 0.004 (0.151)            |
|        |           | V1   | 0.0063*   | 0.043 (0.302)            | 0.7462    | 0.001 (0.039)            | 1.0000    | 0.003 (0.051)            |

| animal | level     | site | $\beta$   |                          | $\gamma$  |                          |
|--------|-----------|------|-----------|--------------------------|-----------|--------------------------|
|        |           |      | $p$       | $\tilde{R}^2 (max(R^2))$ | $p$       | $\tilde{R}^2 (max(R^2))$ |
| 1      | iso 0.0 % | PFC  | 0.1179    | 0.016 (0.154)            | 1.0000    | 0.036 (0.089)            |
|        |           | V1   | 0.0001*** | 0.039 (0.163)            | 1.0000    | 0.018 (0.331)            |
|        | iso 0.5 % | PFC  | 0.0000*** | 0.003 (0.023)            | 0.5147    | 0.007 (0.068)            |
|        |           | V1   | 0.9981    | 0.025 (0.081)            | 1.0000    | 0.005 (0.009)            |
|        | iso 1.0 % | PFC  | 0.7781    | 0.001 (0.044)            | 0.9392    | 0.004 (0.063)            |
|        |           | V1   | 0.1122    | 0.003 (0.045)            | 0.8076    | 0.003 (0.061)            |
| 2      | iso 0.0 % | PFC  | 0.0000*** | 0.005 (0.047)            | 1.0000    | 0.006 (0.077)            |
|        |           | V1   | 0.2450    | 0.015 (0.185)            | 1.0000    | 0.027 (0.060)            |
|        | iso 0.5 % | PFC  | 0.0000*** | 0.007 (0.094)            | 0.0000*** | 0.014 (0.088)            |
|        |           | V1   | 1.0000    | 0.036 (0.087)            | 1.0000    | 0.010 (0.080)            |
|        | iso 1.0 % | PFC  | 1.0000    | 0.007 (0.073)            | 1.0000    | 0.008 (0.227)            |
|        |           | V1   | 1.0000    | 0.001 (0.062)            | 1.0000    | 0.017 (0.147)            |

\* $p < 0.05$ ; \*\* $p < 0.01$ ; \*\*\* $p < 0.001$
