# Supplementary material for: Breakdown of local information processing may underlie isoflurane anesthesia effects
Source: PLOS journal article supplement (doi:10.1371/journal.pcbi.1005511), 2017-06-01
Supplement: S7 (10.1371/journal.pcbi.1005511.s007) [file journal.pcbi.1005511.s007.pdf]

| animal | level     | direction | $\delta$  |                          | $\theta$ |                          | $\alpha$ |                          |
|--------|-----------|-----------|-----------|--------------------------|----------|--------------------------|----------|--------------------------|
|        |           |           | $p$       | $\tilde{R}^2 (max(R^2))$ | $p$      | $\tilde{R}^2 (max(R^2))$ | $p$      | $\tilde{R}^2 (max(R^2))$ |
| 1      | iso 0.0 % | PFC → V1  | 1.0000    | 0.024 (0.101)            | 1.0000   | 0.034 (0.122)            | 1.0000   | 0.061 (0.146)            |
|        |           | V1 → PFC  | 0.9662    | 0.030 (0.230)            | 0.8389   | 0.009 (0.045)            | 1.0000   | 0.008 (0.047)            |
|        | iso 0.5 % | PFC → V1  | 1.0000    | 0.033 (0.090)            | 1.0000   | 0.073 (0.132)            | 1.0000   | 0.013 (0.117)            |
|        |           | V1 → PFC  | 0.1319    | 0.001 (0.010)            | 1.0000   | 0.018 (0.058)            | 0.9097   | 0.001 (0.015)            |
|        | iso 1.0 % | PFC → V1  | 1.0000    | 0.009 (0.058)            | 1.0000   | 0.009 (0.029)            | 1.0000   | 0.012 (0.038)            |
|        |           | V1 → PFC  | 0.0947    | 0.002 (0.024)            | 1.0000   | 0.003 (0.116)            | 0.9996   | 0.004 (0.058)            |
| 2      | iso 0.0 % | PFC → V1  | 1.0000    | 0.060 (0.102)            | 1.0000   | 0.055 (0.121)            | 1.0000   | 0.036 (0.052)            |
|        |           | V1 → PFC  | 0.9998    | 0.006 (0.038)            | 1.0000   | 0.012 (0.056)            | 0.9998   | 0.010 (0.040)            |
|        | iso 0.5 % | PFC → V1  | 1.0000    | 0.108 (0.157)            | 1.0000   | 0.115 (0.166)            | 1.0000   | 0.079 (0.160)            |
|        |           | V1 → PFC  | 1.0000    | 0.026 (0.149)            | 1.0000   | 0.015 (0.052)            | 0.6675   | 0.003 (0.009)            |
|        | iso 1.0 % | PFC → V1  | 0.0000*** | 0.009 (0.095)            | 1.0000   | 0.010 (0.037)            | 1.0000   | 0.007 (0.030)            |
|        |           | V1 → PFC  | 0.0153    | 0.008 (0.023)            | 1.0000   | 0.006 (0.035)            | 0.7369   | 0.001 (0.017)            |

| animal | level     | site     | $\beta$   |                          | $\gamma$  |                          |
|--------|-----------|----------|-----------|--------------------------|-----------|--------------------------|
|        |           |          | $p$       | $\tilde{R}^2 (max(R^2))$ | $p$       | $\tilde{R}^2 (max(R^2))$ |
| 1      | iso 0.0 % | PFC → V1 | 1.0000    | 0.069 (0.157)            | 0.0352    | 0.005 (0.044)            |
|        |           | V1 → PFC | 0.9612    | 0.010 (0.040)            | 0.0009**  | 0.010 (0.028)            |
|        | iso 0.5 % | PFC → V1 | 1.0000    | 0.033 (0.121)            | 0.0611    | 0.031 (0.038)            |
|        |           | V1 → PFC | 0.9991    | 0.010 (0.039)            | 0.0014**  | 0.021 (0.028)            |
|        | iso 1.0 % | PFC → V1 | 0.0000*** | 0.004 (0.019)            | 0.0000*** | 0.007 (0.054)            |
|        |           | V1 → PFC | 0.0912    | 0.002 (0.063)            | 0.0000*** | 0.006 (0.109)            |
| 2      | iso 0.0 % | PFC → V1 | 1.0000    | 0.021 (0.040)            | 0.3062    | 0.015 (0.036)            |
|        |           | V1 → PFC | 0.9998    | 0.002 (0.039)            | 0.2046    | 0.002 (0.041)            |
|        | iso 0.5 % | PFC → V1 | 1.0000    | 0.107 (0.132)            | 0.6054    | 0.006 (0.013)            |
|        |           | V1 → PFC | 0.0186    | 0.004 (0.019)            | 0.0000*** | 0.022 (0.041)            |
|        | iso 1.0 % | PFC → V1 | 0.9940    | 0.004 (0.039)            | 0.0025*   | 0.003 (0.027)            |
|        |           | V1 → PFC | 0.9122    | 0.002 (0.013)            | 0.0000*** | 0.002 (0.058)            |

\* $p < 0.05$ ; \*\* $p < 0.01$ ; \*\*\* $p < 0.001$
